# Supplementary material for: BAG6 restricts pancreatic cancer progression by suppressing the release of IL33-presenting extracellular vesicles and the activation of mast cells
Source: PubMed Central journal article supplement (PMC11291976; doi:10.1038/s41423-024-01195-1), 2024-06-28
Supplement: 41423_2024_1195_MOESM10_ESM.pdf [file 41423_2024_1195_MOESM10_ESM.pdf]

| Protein     | HMCs BAG6<br>KO EV_1<br>(NPX) | HMCs BAG6<br>KO EV_2<br>(NPX) | HMCs PBS<br>(NPX) | SD pooled<br>( $SD=\sqrt{(\sum(NPX_i - \text{mean})^2 / 3)}$ ) | Mean NPX BAG6<br>KO - NPX PBS |
|-------------|-------------------------------|-------------------------------|-------------------|----------------------------------------------------------------|-------------------------------|
| NT5E        | 4.796                         | 4.8973                        | -5.9273           | 3                                                              | 10.77395                      |
| IL13        | 7.7111                        | 7.8312                        | -2.8532           | 6.134265262                                                    | 10.62435                      |
| ALPP        | -2.0152                       | -1.7296                       | -9.9495           | 4.665501757                                                    | 8.0771                        |
| TGFBI       | 1.3896                        | 1.4707                        | -5.9637           | 4.269033877                                                    | 7.39385                       |
| CDCP1       | 4.3988                        | 4.3542                        | -2.9576           | 4.23440333                                                     | 7.3341                        |
| EPCAM       | 1.2407                        | 1.3728                        | -5.9566           | 4.194017208                                                    | 7.26335                       |
| EPHA2       | 1.8772                        | 2.025                         | -4.7267           | 3.856137812                                                    | 6.6778                        |
| HSPG2       | 3.2488                        | 3.4279                        | -3.3092           | 3.83900936                                                     | 6.64755                       |
| EGFR        | 0.7937                        | 0.8508                        | -5.4406           | 3.615970844                                                    | 6.26285                       |
| COL18A1     | 1.4155                        | 1.3847                        | -4.6256           | 3.478973602                                                    | 6.0257                        |
| PDGFB       | -2.0879                       | -2.1604                       | -8.1446           | 3.476097447                                                    | 6.02045                       |
| ENG         | 0.0963                        | 0.0838                        | -5.897            | 3.45663058                                                     | 5.98705                       |
| TFPI        | -0.366                        | -0.1477                       | -6.2307           | 3.450730598                                                    | 5.97385                       |
| CCN1        | -1.1446                       | -1.1807                       | -7.0807           | 3.416835437                                                    | 5.91805                       |
| ITGAV       | -1.1959                       | -1.0059                       | -6.9044           | 3.351998769                                                    | 5.8035                        |
| THY1        | -1.9817                       | -2.1262                       | -7.7503           | 3.289582725                                                    | 5.69635                       |
| CEACAM19    | -4.7261                       | -4.1672                       | -9.9781           | 3.205787267                                                    | 5.53145                       |
| SYT1        | 3.8096                        | 3.7674                        | -1.5787           | 3.098826201                                                    | 5.3672                        |
| ANXA2       | 4.1241                        | 4.1866                        | -1.1219           | 3.046981963                                                    | 5.27725                       |
| F3          | -1.659                        | -1.3467                       | -6.6976           | 3.003252461                                                    | 5.19475                       |
| EDIL3       | 2.2404                        | 2.2996                        | -2.4318           | 2.714746871                                                    | 4.7018                        |
| SUSD2       | -0.7171                       | -0.8574                       | -5.3716           | 2.647705169                                                    | 4.58435                       |
| ANGPTL4     | -2.0641                       | -1.8348                       | -6.4814           | 2.619033198                                                    | 4.53195                       |
| CD63        | -0.5976                       | -0.3567                       | -4.9591           | 2.590456872                                                    | 4.48195                       |
| CKAP4       | -2.6646                       | -2.321                        | -6.8683           | 2.532031198                                                    | 4.3755                        |
| ADAMTS15    | 0.391                         | 0.3696                        | -3.9013           | 2.47200607                                                     | 4.2816                        |
| TNFAIP8     | -1.6335                       | -4.0322                       | -7.0719           | 2.725488713                                                    | 4.23905                       |
| EFB4A_DEFBA | -7.1513                       | -8.8444                       | -11.9898          | 2.455307551                                                    | 3.99195                       |
| CST5        | -7.8423                       | -6.7848                       | -11.2918          | 2.356919087                                                    | 3.97825                       |
| NRP1        | -0.5515                       | -0.4526                       | -4.4376           | 2.272728882                                                    | 3.93555                       |
| ITGB5       | -0.324                        | -0.2982                       | -4.2344           | 2.265155044                                                    | 3.9233                        |
| CRIM1       | -0.5165                       | -0.2821                       | -4.2378           | 2.219255864                                                    | 3.8385                        |
| TNC         | 1.4872                        | 1.6412                        | -2.1913           | 2.169605744                                                    | 3.7555                        |
| EPHB4       | -1.0523                       | -1.0235                       | -4.7137           | 2.122272973                                                    | 3.6758                        |
| ICAM1       | 3.2236                        | 3.2078                        | -0.3919           | 2.082863813                                                    | 3.6076                        |
| VWA1        | -3.0153                       | -2.793                        | -6.5034           | 2.080998441                                                    | 3.59925                       |
| ITGA2       | -0.646                        | -0.5388                       | -4.1839           | 2.074246139                                                    | 3.5915                        |
| PXN         | -1.6891                       | -1.9261                       | -5.3745           | 2.062757245                                                    | 3.5669                        |
| CD109       | -0.1334                       | -0.1096                       | -3.4077           | 1.897325773                                                    | 3.2862                        |
| BSG         | -1.692                        | -1.5192                       | -4.8827           | 1.894006273                                                    | 3.2771                        |
| ITGA5       | 0.913                         | 1.0445                        | -2.2809           | 1.883108008                                                    | 3.25965                       |
| ANPEP       | 5.1537                        | 5.2626                        | 2.133             | 1.776273433                                                    | 3.07515                       |
| LAMA4       | -2.0032                       | -1.8522                       | -4.9922           | 1.770900054                                                    | 3.0645                        |
| TINAGL1     | -1.9885                       | -2.1416                       | -5.0579           | 1.729617571                                                    | 2.99285                       |
| IST1        | 0.7549                        | 1.1458                        | -1.995            | 1.711693969                                                    | 2.94535                       |
| F7          | -7.2242                       | -7.4007                       | -10.194           | 1.66600266                                                     | 2.88155                       |

|           |          |          |          |             |         |
|-----------|----------|----------|----------|-------------|---------|
| CD59      | 2.4664   | 2.5286   | -0.3817  | 1.662597794 | 2.8792  |
| VIM       | 0.2337   | 0.5193   | -2.3967  | 1.607463194 | 2.7732  |
| SERPINE1  | 0.3341   | 0.5235   | -2.3146  | 1.586731213 | 2.7434  |
| SLC16A1   | 2.3289   | 2.0778   | -0.5294  | 1.582741395 | 2.73275 |
| PDGFA     | 0.351    | 0.2484   | -2.4194  | 1.570711079 | 2.7191  |
| SPRR3     | -9.7635  | -4.9854  | -10.0833 | 2.855436221 | 2.70885 |
| ITGB1     | 3.3129   | 3.4911   | 0.7508   | 1.533262086 | 2.6512  |
| FGFBP1    | -3.2283  | -3.0807  | -5.7784  | 1.516705919 | 2.6239  |
| KRT19     | 0.5725   | 0.5323   | -2.0557  | 1.505921384 | 2.6081  |
| ITGB1BP2  | -1.0909  | -1.121   | -3.6807  | 1.486608788 | 2.57475 |
| ERBB2     | -4.0458  | -3.9308  | -6.5537  | 1.482250081 | 2.5654  |
| LGALS3    | -1.6384  | -1.5593  | -4.1061  | 1.44810165  | 2.50725 |
| ACP6      | -8.7696  | -7.8569  | -10.7935 | 1.502931139 | 2.48025 |
| MFGE8     | 7.1249   | 7.2731   | 4.7265   | 1.429420475 | 2.4725  |
| SPINT2    | -1.7935  | -1.6948  | -4.2165  | 1.428264774 | 2.47235 |
| CA2       | -4.599   | -3.9511  | -6.7442  | 1.461908858 | 2.46915 |
| KRT18     | -1.6203  | -1.1923  | -3.8016  | 1.399386781 | 2.3953  |
| MXRA8     | -3.0014  | -2.7078  | -5.2268  | 1.377435245 | 2.3722  |
| MATN2     | -3.2925  | -3.2925  | -5.6434  | 1.357292748 | 2.3509  |
| CTRL      | -6.3344  | -6.7481  | -8.8585  | 1.353761221 | 2.31725 |
| GLIPR1    | -4.2484  | -8.6378  | -8.7483  | 2.566714587 | 2.3052  |
| KLK14     | -8.4446  | -12.7135 | -12.8114 | 2.493392397 | 2.23235 |
| ARHGEF5   | -1.6513  | -1.886   | -4       | 1.293604253 | 2.23135 |
| CD86      | -6.0222  | -6.2136  | -8.3445  | 1.289085339 | 2.2266  |
| OCLN      | 3.7849   | 3.7382   | 1.6196   | 1.236875832 | 2.14195 |
| MCAM      | -0.6804  | -0.3163  | -2.6327  | 1.245642609 | 2.13435 |
| PODXL     | -4.8028  | -5.0784  | -7.0364  | 1.217831975 | 2.0958  |
| MITD1     | 3.633    | 3.4668   | 1.464    | 1.207158598 | 2.0859  |
| SERPINA12 | -6.1698  | -4.5155  | -7.4285  | 1.460970179 | 2.08585 |
| CA9       | -4.4513  | -4.3103  | -6.387   | 1.160423657 | 2.0062  |
| PPL       | -0.2231  | -0.0536  | -2.1283  | 1.152019776 | 1.98995 |
| CXADR     | -1.8843  | -1.8274  | -3.8251  | 1.137302916 | 1.96925 |
| ENAH      | 0.8277   | 1.0845   | -0.984   | 1.12745254  | 1.9401  |
| LTBP2     | -1.7261  | -1.8965  | -3.7414  | 1.1175961   | 1.9301  |
| CDH1      | -3.1038  | -2.8562  | -4.9075  | 1.119707636 | 1.9275  |
| TNFRSF10B | -0.3066  | -0.5787  | -2.3499  | 1.109524128 | 1.90725 |
| GCG       | -10.7302 | -7.4475  | -10.9816 | 1.971851248 | 1.89275 |
| PDIA5     | -0.901   | -0.6312  | -2.6527  | 1.097550848 | 1.8866  |
| AKAP12    | 1.5792   | 1.714    | -0.2349  | 1.088373485 | 1.8815  |
| FAS       | 0.2867   | 0.5812   | -1.4159  | 1.078114513 | 1.84985 |
| KIAA1549  | -0.7082  | -0.5318  | -2.3915  | 1.02657196  | 1.7715  |
| CYB5R2    | -3.9826  | -4.0543  | -5.7888  | 1.022740565 | 1.77035 |
| LTBP3     | -1.9665  | -2.3803  | -3.939   | 1.040154827 | 1.7656  |
| PER3      | 0.2287   | -1.1907  | -2.2145  | 1.226926311 | 1.7335  |
| MILR1     | -1.5864  | -1.5842  | -3.3176  | 1.000144476 | 1.7323  |
| HEG1      | -4.3721  | -4.262   | -6.0474  | 1.000533629 | 1.73035 |
| LXN       | -1.4603  | -1.2563  | -3.0773  | 0.997692839 | 1.719   |
| LGALS3BP  | 5.6549   | 5.6873   | 3.9674   | 0.983765048 | 1.7037  |
| PCSK7     | -2.7885  | -2.79    | -4.4648  | 0.967379534 | 1.67555 |
| FUT3_FUT5 | -7.6727  | -7.4114  | -9.2171  | 0.975875807 | 1.67505 |

|            |         |         |         |             |         |
|------------|---------|---------|---------|-------------|---------|
| CA13       | -1.1374 | -1.2413 | -2.8539 | 0.962431488 | 1.66455 |
| ADGRG2     | -5.4443 | -6.2912 | -7.4933 | 1.029618458 | 1.62555 |
| CHMP6      | 0.6853  | 0.7412  | -0.9031 | 0.933618575 | 1.61635 |
| LYPD8      | -4.9406 | -2.243  | -5.1921 | 1.634905136 | 1.6003  |
| TNPO1      | 0.9577  | -0.1097 | -1.1415 | 1.04965031  | 1.5655  |
| CEP112     | 0.9254  | 0.8263  | -0.6785 | 0.898771296 | 1.55435 |
| SCAMP3     | 2.3085  | 2.3815  | 0.8171  | 0.882888283 | 1.5279  |
| MAG        | -0.2751 | -0.2893 | -1.8015 | 0.877196998 | 1.5193  |
| TNFAIP2    | -1.5304 | -1.4198 | -2.987  | 0.87464581  | 1.5119  |
| YES1       | -0.3013 | -0.2414 | -1.7485 | 0.853358684 | 1.47715 |
| BAIAP2     | 4.1232  | 3.9935  | 2.5882  | 0.851265252 | 1.47015 |
| EZR        | 3.4161  | 3.275   | 1.8814  | 0.848266297 | 1.46415 |
| VAMP8      | -0.1937 | -0.8034 | -1.9444 | 0.888684944 | 1.44585 |
| NOTCH2     | -1.8939 | -1.6622 | -3.2172 | 0.838931143 | 1.43915 |
| CL8-OID201 | 3.7826  | 3.8466  | 2.3917  | 0.822134703 | 1.4229  |
| PLSCR3     | 1.9661  | 2.0808  | 0.6082  | 0.819105128 | 1.41525 |
| SLAMF7     | -3.7136 | -4.4453 | -5.4868 | 0.891099076 | 1.40735 |
| DIABLO     | 2.4519  | 2.6567  | 1.1668  | 0.807591797 | 1.3875  |
| TAGLN3     | -0.1729 | -0.4443 | -1.696  | 0.812428916 | 1.3874  |
| ANXA4      | 2.6007  | 2.7303  | 1.282   | 0.801388248 | 1.3835  |
| EPB41L5    | 1.0301  | 1.3309  | -0.1998 | 0.810984704 | 1.3803  |
| WASL       | 0.3709  | 1.1076  | -0.6317 | 0.873030941 | 1.37095 |
| CSPG4      | 0.0497  | 0.1702  | -1.2472 | 0.785863922 | 1.35715 |
| TNFRSF10A  | 0.12    | 0.0839  | -1.2533 | 0.782662117 | 1.35525 |
| CL8-OID206 | 1.251   | 1.3052  | -0.0681 | 0.777701243 | 1.3462  |
| AK2        | 0.3796  | 0.2917  | -1.006  | 0.775847822 | 1.34165 |
| JUN        | 1.4534  | 1.6649  | 0.2408  | 0.76846078  | 1.31835 |
| CD40       | 1.7408  | 1.7884  | 0.4666  | 0.749778483 | 1.298   |
| DSG3       | -6.5426 | -8.4123 | -8.7733 | 1.197366665 | 1.29585 |
| SNAP23     | 1.7432  | 1.8378  | 0.5     | 0.746570407 | 1.2905  |
| STOML2     | -0.3974 | -0.9396 | -1.9526 | 0.789387619 | 1.2841  |
| LONP1      | 3.2112  | 2.7323  | 1.6891  | 0.778288706 | 1.28265 |
| PADI2      | -0.3589 | -0.2939 | -1.5944 | 0.73280119  | 1.268   |
| ATP6V1G2   | -1.2013 | -1.1831 | -2.4525 | 0.727691446 | 1.2603  |
| CL8-OID209 | 1.2986  | 1.2398  | 0.0128  | 0.725978429 | 1.2564  |
| VNN1       | -5.3348 | -5.569  | -6.7013 | 0.730784416 | 1.2494  |
| LAT2       | -1.5923 | -1.5602 | -2.8076 | 0.711101406 | 1.23135 |
| BTLA       | 2.4695  | 2.2906  | 1.152   | 0.714635271 | 1.22805 |
| IGFBP1     | -5.4469 | -5.4213 | -6.6606 | 0.708235782 | 1.2265  |
| NBN        | 3.5221  | 3.6906  | 2.3863  | 0.709416706 | 1.22005 |
| PSIP1      | 2.4461  | 2.372   | 1.1919  | 0.703697906 | 1.21715 |
| CA14       | -8.1434 | -7.9657 | -9.2643 | 0.704078128 | 1.20975 |
| COL9A2     | -0.44   | 0.2716  | -1.2918 | 0.782747017 | 1.2076  |
| KYAT1      | 1.0755  | 0.8229  | -0.2475 | 0.702364094 | 1.1967  |
| HDGF       | 3.2761  | 3.332   | 2.1081  | 0.691047516 | 1.19595 |
| AGT        | -5.3603 | -5.3174 | -6.5121 | 0.677715739 | 1.17325 |
| CL8-OID214 | 1.1501  | 1.0669  | -0.0644 | 0.678450708 | 1.1729  |
| NUMB       | -0.774  | -0.7243 | -1.9166 | 0.6744855   | 1.16745 |
| PPY        | -7.1405 | -7.0268 | -8.2381 | 0.668942093 | 1.15445 |
| CD2AP      | 1.8115  | 1.6366  | 0.5715  | 0.671146782 | 1.15255 |

|          |         |         |          |             |         |
|----------|---------|---------|----------|-------------|---------|
| OSCAR    | -7.9917 | -8.8821 | -9.5836  | 0.79781577  | 1.1467  |
| PDCD6    | -0.6139 | -0.5067 | -1.6992  | 0.659725218 | 1.1389  |
| THBD     | -3.1527 | -3.2381 | -4.33    | 0.656451834 | 1.1346  |
| TP53I3   | -0.196  | -0.1589 | -1.3112  | 0.654833661 | 1.13375 |
| LAG3     | -4.4889 | -4.5298 | -5.6422  | 0.654370876 | 1.13285 |
| TGOLN2   | 1.1082  | 1.2107  | 0.0282   | 0.655135164 | 1.13125 |
| RALY     | 0.6125  | 0.6637  | -0.4843  | 0.64852341  | 1.1224  |
| ZCCHC8   | 4.5762  | 4.1992  | 3.2671   | 0.673879591 | 1.1206  |
| CEP290   | -0.1109 | 0.1844  | -1.0756  | 0.658969926 | 1.11235 |
| CD274    | -7.0688 | -5.3821 | -7.3378  | 1.060037765 | 1.11235 |
| LAMP1    | 1.4049  | 1.5479  | 0.3668   | 0.644605541 | 1.1096  |
| CD302    | -6.0338 | -7.0156 | -7.634   | 0.806947937 | 1.1093  |
| CD164    | 2.8772  | 2.8786  | 1.7765   | 0.635893972 | 1.1014  |
| PRKAR1A  | 0.3562  | 0.2878  | -0.7763  | 0.635025409 | 1.0983  |
| RBKS     | -2.7508 | -2.9395 | -3.9363  | 0.637001855 | 1.09115 |
| FOLR1    | -7.9902 | -6.8197 | -8.4952  | 0.85949554  | 1.09025 |
| EFHD1    | -1.4071 | -1.4818 | -2.5299  | 0.627796881 | 1.08545 |
| LILRB1   | -6.6693 | -7.0394 | -7.9391  | 0.653047489 | 1.08475 |
| CTSL     | -0.23   | -0.0201 | -1.2089  | 0.63450094  | 1.08385 |
| CEP20    | 1.0609  | 1.7477  | 0.3262   | 0.710884494 | 1.0781  |
| PINLYP   | -5.278  | -6.9444 | -7.1794  | 1.036615962 | 1.0682  |
| PTS      | -1.2225 | -1.1699 | -2.2594  | 0.614401961 | 1.0632  |
| SEMA4C   | -1.4218 | -1.8538 | -2.7007  | 0.650570112 | 1.0629  |
| CD58     | -3.1973 | -2.8728 | -4.0946  | 0.632882662 | 1.05955 |
| RGMA     | -7.9191 | -6.902  | -8.4676  | 0.794402083 | 1.05705 |
| YJU2     | 0.7825  | 0.8442  | -0.2431  | 0.610721369 | 1.05645 |
| FHIT     | -0.2194 | -0.5046 | -1.4121  | 0.622820009 | 1.0501  |
| GUSB     | -0.0484 | 0.0949  | -1.0219  | 0.607656616 | 1.04515 |
| NLGN1    | -0.0956 | -0.7813 | -1.4821  | 0.693263704 | 1.04365 |
| RGCC     | -1.2785 | -1.7385 | -2.5504  | 0.644012321 | 1.0419  |
| LATS1    | 0.4684  | 0.6741  | -0.4698  | 0.609786703 | 1.04105 |
| TNFSF12  | -8.7814 | -9.5174 | -10.1777 | 0.698491921 | 1.0283  |
| C19orf12 | 0.2219  | 0.4237  | -0.704   | 0.60134867  | 1.0268  |
| TCOF1    | 3.8283  | 3.7113  | 2.7462   | 0.593864101 | 1.0236  |
| CSRP3    | -0.6444 | -1.4677 | -2.0713  | 0.71626339  | 1.01525 |
| OSMR     | -2.1047 | -1.8317 | -2.9834  | 0.601810543 | 1.0152  |
| SORT1    | -5.2492 | -3.8784 | -5.579   | 0.901840806 | 1.0152  |
| C9       | -3.0006 | -3.3319 | -4.1742  | 0.605057289 | 1.00795 |
| LY75     | -5.1849 | -6.614  | -6.9056  | 0.920884164 | 1.00615 |
| PPP1R2   | 2.855   | 2.8364  | 1.8402   | 0.580600184 | 1.0055  |
| LPL      | -8.2918 | -7.3991 | -8.8445  | 0.72933437  | 0.99905 |
| EIF4G3   | -0.5868 | -0.0327 | -1.3037  | 0.637235359 | 0.99395 |
| AKR1B1   | -3.005  | -2.5368 | -3.759   | 0.616644155 | 0.9881  |
| GRPEL1   | 1.4331  | 1.4292  | 0.4489   | 0.567105654 | 0.98225 |
| MTR      | 1.0954  | 1.1684  | 0.1526   | 0.566576044 | 0.9793  |
| PNMA2    | 0.3265  | 0.0166  | -0.8067  | 0.585662465 | 0.97825 |
| STK4     | 2.1519  | 2.1224  | 1.159    | 0.564927756 | 0.97815 |
| NIT2     | 2.1454  | 1.6976  | 0.949    | 0.604469431 | 0.9725  |
| CCN5     | -4.3745 | -4.4877 | -5.3963  | 0.560125498 | 0.9652  |
| AHSP     | -5.41   | -5.3259 | -6.3328  | 0.558641247 | 0.96485 |

|              |          |         |          |             |         |
|--------------|----------|---------|----------|-------------|---------|
| NUDT16       | 1.462    | 1.5123  | 0.5244   | 0.556412656 | 0.96275 |
| SLC1A4       | 1.5715   | 1.2531  | 0.4503   | 0.57777675  | 0.962   |
| QDPR         | -2.3896  | -2.5377 | -3.4254  | 0.560182491 | 0.96175 |
| CPM          | -4.4095  | -4.2414 | -5.2834  | 0.559422741 | 0.95795 |
| FDX1         | 3.1177   | 1.6455  | 1.4249   | 0.920290628 | 0.9567  |
| CD69         | 1.5809   | 1.8346  | 0.7512   | 0.566645295 | 0.95655 |
| MDM1         | 0.2662   | 0.1009  | -0.7723  | 0.558015021 | 0.95585 |
| COL28A1      | -1.4219  | -2.0222 | -2.677   | 0.627747181 | 0.95495 |
| CD14         | -7.277   | -7.0577 | -8.1192  | 0.56038314  | 0.95185 |
| CLPS         | -6.74    | -6.9232 | -7.7821  | 0.556363769 | 0.9505  |
| SPINT3       | -7.0162  | -7.3941 | -8.1501  | 0.577360895 | 0.94495 |
| SCARB1       | 0.118    | -0.6412 | -1.2055  | 0.664137458 | 0.9439  |
| KLK6         | -10.3222 | -8.2773 | -10.2423 | 1.1582476   | 0.94255 |
| NMNAT1       | 2.9116   | 2.7989  | 1.913    | 0.546918955 | 0.94225 |
| EPS8L2       | -2.3476  | -2.182  | -3.2066  | 0.550016594 | 0.9418  |
| GOT1         | 2.2628   | 2.2182  | 1.3051   | 0.540513654 | 0.9354  |
| TIMM8A       | 4.0631   | 3.9592  | 3.0789   | 0.540736063 | 0.93225 |
| PTPRF        | -4.0504  | -4.4342 | -5.1717  | 0.569871679 | 0.9294  |
| PRKAR2A      | -0.2869  | -0.3487 | -1.2459  | 0.536728994 | 0.9281  |
| LBR          | 4.6341   | 4.6773  | 3.7323   | 0.53356263  | 0.9234  |
| LRRC25       | -4.9752  | -4.8496 | -5.834   | 0.535779208 | 0.9216  |
| LRP11        | -5.644   | -5.8071 | -6.6468  | 0.538099362 | 0.92125 |
| APOE         | -0.8053  | -0.4444 | -1.5441  | 0.560567323 | 0.91925 |
| HNMT         | -5.6542  | -6.7519 | -7.1185  | 0.761961869 | 0.91545 |
| EIF4B        | 0.7509   | 0.5458  | -0.2664  | 0.537995375 | 0.91475 |
| LAP3         | -0.4375  | -1.1355 | -1.6986  | 0.631751378 | 0.9121  |
| SETMAR       | -1.6767  | -1.71   | -2.6037  | 0.525854476 | 0.91035 |
| NACC1        | 2.4146   | 2.5096  | 1.5538   | 0.526554093 | 0.9083  |
| SIGLEC7      | -3.7032  | -4.0585 | -4.784   | 0.550865528 | 0.90315 |
| RBM19        | 1.8247   | 1.6562  | 0.8413   | 0.525916632 | 0.89915 |
| PPP1R14A     | -0.6869  | -1.0529 | -1.7625  | 0.546870417 | 0.8926  |
| ERMAP        | -3.0236  | -3.5149 | -4.1579  | 0.56883817  | 0.88865 |
| NAGPA        | -5.2087  | -5.0595 | -6.0215  | 0.517743257 | 0.8874  |
| CHI3L1       | -3.6001  | -4.1608 | -4.7652  | 0.582686574 | 0.88475 |
| TPR          | 4.195    | 4.1277  | 3.2769   | 0.511744979 | 0.88445 |
| HMOX1        | -2.441   | -2.4354 | -3.3204  | 0.509346104 | 0.8822  |
| ADGRE5       | 3.3336   | 3.4635  | 2.5239   | 0.509139185 | 0.87465 |
| CIT          | 5.573    | 5.2899  | 4.5569   | 0.524387551 | 0.87455 |
| SERPINB8     | -0.954   | -0.9779 | -1.8405  | 0.505063069 | 0.87455 |
| NDRG1        | -0.6666  | -0.9869 | -1.7013  | 0.52971117  | 0.87455 |
| MGLL         | -3.4669  | -3.4556 | -4.3339  | 0.503856392 | 0.87265 |
| CRIB-OID3104 | 1.3928   | 1.3427  | 0.504    | 0.499315054 | 0.86375 |
| SART1        | 2.973    | 2.7564  | 2.001    | 0.510282392 | 0.8637  |
| MYDGF        | 2.5476   | 2.4573  | 1.6388   | 0.500668516 | 0.86365 |
| EIF4G1       | 1.4409   | 1.6366  | 0.6752   | 0.508082169 | 0.86355 |
| LACTB2       | 2.8745   | 2.8717  | 2.012    | 0.497158288 | 0.8611  |
| LRP1         | -3.3392  | -2.5533 | -3.8063  | 0.633223265 | 0.86005 |
| STX4         | 2.1505   | 2.189   | 1.3118   | 0.495711573 | 0.85795 |
| ACY3         | -6.2188  | -5.8875 | -6.9082  | 0.520714339 | 0.85505 |
| UFD1         | -1.3838  | -1.7134 | -2.4036  | 0.520417179 | 0.855   |

|          |         |         |         |             |         |
|----------|---------|---------|---------|-------------|---------|
| AXL      | -2.7776 | -2.4883 | -3.4873 | 0.514031384 | 0.85435 |
| DFFA     | 1.2605  | 1.3861  | 0.4705  | 0.496353154 | 0.8528  |
| PGD      | 2.7207  | 2.6268  | 1.822   | 0.493994254 | 0.85175 |
| ITGB2    | -1.737  | -1.4886 | -2.4633 | 0.506500138 | 0.8505  |
| AKR1B10  | -1.3206 | -0.5268 | -1.7736 | 0.631115108 | 0.8499  |
| ANXA1    | -0.0611 | 0.1874  | -0.7839 | 0.504581639 | 0.84705 |
| ENPP7    | -7.6529 | -7.6195 | -8.4826 | 0.488954541 | 0.8464  |
| TPD52L2  | 2.1151  | 2.2518  | 1.3391  | 0.49225403  | 0.84435 |
| PLIN3    | 1.7489  | 1.6008  | 0.8325  | 0.491936219 | 0.84235 |
| EIF4EBP1 | 4.1331  | 4.051   | 3.2508  | 0.487427557 | 0.84125 |
| RCC1     | 2.3266  | 2.4186  | 1.5318  | 0.487610719 | 0.8408  |
| MTDH     | 0.6131  | 0.3286  | -0.3695 | 0.505599746 | 0.84035 |
| TNFRSF17 | -6.0935 | -5.4309 | -6.6023 | 0.587380365 | 0.8401  |
| PSMG3    | 1.0965  | 1.348   | 0.3844  | 0.499810567 | 0.83785 |
| PTGR1    | -0.4632 | -0.4657 | -1.3001 | 0.482464372 | 0.83565 |
| IL1A     | 1.6061  | 0.6495  | 0.2922  | 0.679347734 | 0.8356  |
| SPAG1    | -2.3997 | -2.3763 | -3.2231 | 0.482287148 | 0.8351  |
| RNF168   | 2.3619  | 2.0705  | 1.3834  | 0.502407972 | 0.8328  |
| GET3     | 2.2443  | 2.2843  | 1.4321  | 0.480886972 | 0.8322  |
| CCL5     | -2.1829 | -2.0954 | -2.9705 | 0.48196992  | 0.83135 |
| THTPA    | -0.7072 | -0.7079 | -1.5389 | 0.479980274 | 0.83135 |
| FABP2    | -6.6847 | -5.5091 | -6.9275 | 0.75860022  | 0.8306  |
| BTN2A1   | -1.1872 | -1.0597 | -1.9502 | 0.481562647 | 0.82675 |
| OXCT1    | -1.1726 | -1.0247 | -1.9243 | 0.482391173 | 0.82565 |
| ELOA     | 3.2922  | 3.3541  | 2.4989  | 0.476886349 | 0.82425 |
| PLXNB2   | 0.6054  | 0.7189  | -0.1615 | 0.478908833 | 0.82365 |
| SEC31A   | -0.0538 | -0.4909 | -1.0948 | 0.52272246  | 0.82245 |
| SHD      | -0.4168 | -0.5338 | -1.297  | 0.478001967 | 0.8217  |
| TP53BP1  | 1.4499  | 1.5283  | 0.6725  | 0.473091069 | 0.8166  |
| CDKN1A   | 0.7131  | 1.1042  | 0.0929  | 0.509956688 | 0.81575 |
| LYPLA2   | -0.9378 | -0.3006 | -1.4342 | 0.568255482 | 0.815   |
| ELOB     | 0.399   | 0.4102  | -0.4091 | 0.469823289 | 0.8137  |
| PIBF1    | 2.2113  | 2.2878  | 1.4361  | 0.471200626 | 0.81345 |
| CDA      | -4.8692 | -6.0562 | -6.274  | 0.756071963 | 0.8113  |
| IFNL2    | -0.0119 | -0.3254 | -0.9797 | 0.493799484 | 0.81105 |
| VSIG2    | -1.8356 | -1.5924 | -2.5243 | 0.483372103 | 0.8103  |
| PSMG4    | 0.2825  | 0.2499  | -0.541  | 0.466322103 | 0.8072  |
| COL6A3   | -5.6897 | -5.6217 | -6.462  | 0.466757499 | 0.8063  |
| ZFYVE19  | -0.7123 | -0.4804 | -1.3999 | 0.478200031 | 0.80355 |
| PMS1     | 1.3257  | 1.0587  | 0.3887  | 0.482728012 | 0.8035  |
| SERPINB1 | 3.1468  | 3.2573  | 2.3987  | 0.467093463 | 0.80335 |
| GCHFR    | -0.7817 | -0.5133 | -1.4504 | 0.482589311 | 0.8029  |
| TRIM24   | 2.0934  | 2.0886  | 1.2894  | 0.462810199 | 0.8016  |
| TRIM21   | 1.3111  | 1.3625  | 0.5366  | 0.462709956 | 0.8002  |
| CEND1    | 1.2267  | 1.2506  | 0.4439  | 0.459004709 | 0.79475 |
| MTUS1    | 2.043   | 1.9701  | 1.2121  | 0.460121944 | 0.79445 |
| CDH3     | -1.8503 | -1.9876 | -2.7117 | 0.462814228 | 0.79275 |
| SORD     | -4.4815 | -4.1553 | -5.1085 | 0.484445676 | 0.7901  |
| PRSS22   | -1.9665 | -3.6159 | -3.5808 | 0.94231248  | 0.7896  |
| LEP      | -5.3017 | -4.6399 | -5.7591 | 0.562702207 | 0.7883  |

|           |         |          |         |             |         |
|-----------|---------|----------|---------|-------------|---------|
| FOXJ3     | 1.1366  | 0.9146   | 0.2374  | 0.468409451 | 0.7882  |
| RNF4      | 0.3511  | 0.4268   | -0.399  | 0.456495005 | 0.78795 |
| AHNAK     | -0.9044 | -0.8057  | -1.6421 | 0.457075475 | 0.78705 |
| AIFM1     | 2.5382  | 2.3813   | 1.6774  | 0.458452008 | 0.78235 |
| IGSF3     | 2.8678  | 2.9104   | 2.1069  | 0.452105412 | 0.7822  |
| FAM3D     | -6.2233 | -6.2431  | -7.0148 | 0.451365554 | 0.7816  |
| JPT2      | 0.5131  | 0.5108   | -0.2695 | 0.451171833 | 0.78145 |
| MICB_MICA | -5.0819 | -5.615   | -6.1264 | 0.522287568 | 0.77795 |
| BCL2L15   | -3.725  | -4.1718  | -4.7216 | 0.499186311 | 0.7732  |
| MESD      | 6.9245  | 6.9429   | 6.164   | 0.444481724 | 0.7697  |
| IL1RN     | 0.3164  | 0.422    | -0.3998 | 0.447110918 | 0.769   |
| PRDX5     | -2.1516 | -1.7433  | -2.7161 | 0.488485581 | 0.76865 |
| CDSN      | -4.8323 | -3.7911  | -5.0802 | 0.684023715 | 0.7685  |
| SNRPB2    | 3.4044  | 3.3301   | 2.6002  | 0.444411997 | 0.76705 |
| OGFR      | 0.6195  | 0.7237   | -0.0951 | 0.445709965 | 0.7667  |
| SDC1      | -4.7106 | -4.3852  | -5.3133 | 0.470903752 | 0.7654  |
| GPR15L    | -5.7    | -2.324   | -4.7769 | 1.744811739 | 0.7649  |
| ATRAID    | -1.5357 | -1.4174  | -2.2411 | 0.445358608 | 0.76455 |
| KLB       | -3.4254 | -3.0614  | -4.0071 | 0.477007928 | 0.7637  |
| PDIA2     | 0.0161  | 0.1994   | -0.6539 | 0.449188116 | 0.76165 |
| PPIF      | 3.2739  | 3.139    | 2.4453  | 0.444596383 | 0.76115 |
| AMIGO2    | -5.0974 | -6.189   | -6.4016 | 0.699729348 | 0.7584  |
| MTHFD2    | 3.0079  | 3.0829   | 2.2879  | 0.438947605 | 0.7575  |
| GSTM4     | -1.2184 | -1.3171  | -2.0245 | 0.439688083 | 0.75675 |
| HEXIM1    | 3.4528  | 3.4272   | 2.6857  | 0.435683375 | 0.7543  |
| FNDC1     | -3.6673 | -3.8554  | -4.5149 | 0.4451119   | 0.75355 |
| FABP5     | 1.6943  | 1.6741   | 0.9358  | 0.432206968 | 0.7484  |
| CAT       | 2.307   | 2.2354   | 1.5233  | 0.433281791 | 0.7479  |
| S100A16   | -0.557  | -0.4749  | -1.2637 | 0.433660916 | 0.74775 |
| CHCHD10   | 0.5532  | 0.494    | -0.2238 | 0.432525622 | 0.7474  |
| IKBKG     | 1.9528  | 1.9215   | 1.1909  | 0.431131778 | 0.74625 |
| DECR1     | -1.3198 | -0.8912  | -1.8512 | 0.480916472 | 0.7457  |
| ERP44     | -2.1147 | -2.0934  | -2.8484 | 0.429882616 | 0.74435 |
| SLC9A3R2  | 0.421   | 0.4448   | -0.3109 | 0.429597979 | 0.7438  |
| S100A13   | 4.2955  | 4.2717   | 3.5432  | 0.427635745 | 0.7404  |
| TPRKB     | 0.6014  | -0.0651  | -0.4695 | 0.54076927  | 0.73765 |
| PDP1      | -2.3687 | -1.398   | -2.6202 | 0.645404728 | 0.73685 |
| LRRFIP1   | 1.4165  | 1.4808   | 0.7118  | 0.426633641 | 0.73685 |
| PRKRA     | 0.1503  | -0.2385  | -0.7808 | 0.467654064 | 0.7367  |
| LETM1     | 1.4663  | 1.4774   | 0.738   | 0.423724844 | 0.73385 |
| HSPB1     | 3.0006  | 3.2296   | 2.3818  | 0.438580909 | 0.7333  |
| CD55      | 6.0629  | 6.3445   | 5.4711  | 0.445786451 | 0.7326  |
| CXCL5     | -5.3012 | -5.1879  | -5.9761 | 0.426142805 | 0.73155 |
| PLAU      | 3.3007  | 3.4325   | 2.6368  | 0.426472535 | 0.7298  |
| TEX101    | -1.3154 | -1.8927  | -2.3327 | 0.510191889 | 0.72865 |
| TBCB      | 0.7204  | 0.5094   | -0.1137 | 0.433685258 | 0.7286  |
| OBP2B     | -7.6632 | -10.3261 | -9.7228 | 1.396242545 | 0.72815 |
| NCS1      | -0.7071 | -0.7804  | -1.4666 | 0.418943827 | 0.72285 |
| ACY1      | -0.1594 | -0.1921  | -0.8963 | 0.416330906 | 0.72055 |
| SHH       | 0.1784  | 0.7489   | -0.2516 | 0.501891506 | 0.71525 |

|         |         |         |         |             |         |
|---------|---------|---------|---------|-------------|---------|
| FEN1    | 0.3067  | 0.5057  | -0.308  | 0.424178575 | 0.7142  |
| ERP29   | 4.5874  | 4.3968  | 3.7783  | 0.422988065 | 0.7138  |
| GSTP1   | 2.7557  | 2.6477  | 1.9881  | 0.415520942 | 0.7136  |
| VEGFC   | -3.704  | -3.3111 | -4.2195 | 0.455576781 | 0.71195 |
| FDX2    | 1.5663  | 1.4118  | 0.7815  | 0.415744188 | 0.70755 |
| PALM    | -3.4661 | -3.222  | -4.0511 | 0.426070538 | 0.70705 |
| ENTPD2  | -0.3199 | -0.2736 | -1.0037 | 0.40881376  | 0.70695 |
| AMOTL2  | -0.2996 | 0.0108  | -0.8506 | 0.436264278 | 0.7062  |
| MDGA1   | -8.9761 | -8.4629 | -9.4256 | 0.481701114 | 0.7061  |
| ASPSCR1 | 0.5448  | -0.0533 | -0.458  | 0.504498685 | 0.70375 |
| KRT17   | 1.3459  | 0.2955  | 0.1172  | 0.663932067 | 0.7035  |
| TARM1   | -1.6413 | -0.8417 | -1.9438 | 0.569428196 | 0.7023  |
| TBCA    | 3.284   | 3.209   | 2.5452  | 0.406628594 | 0.7013  |
| CCAR2   | 0.5669  | 0.5588  | -0.1369 | 0.40402115  | 0.69975 |
| FOXO3   | 1.0483  | 0.6882  | 0.1688  | 0.442147905 | 0.69945 |
| ACADSB  | 0.4899  | 0.0503  | -0.4291 | 0.459643616 | 0.6992  |
| MNAT1   | 1.8578  | 1.7229  | 1.0914  | 0.409137145 | 0.69895 |
| RAB33A  | 0.5283  | 0.3     | -0.2844 | 0.419151035 | 0.69855 |
| PEPD    | 1.3563  | 1.4694  | 0.7168  | 0.405823981 | 0.69605 |
| TMCO5A  | -1.1503 | -0.4515 | -1.4965 | 0.532322095 | 0.6956  |
| THOP1   | 1.0623  | 1.1058  | 0.3886  | 0.402106905 | 0.69545 |
| F11R    | 5.0651  | 5.1849  | 4.4297  | 0.405876057 | 0.6953  |
| GMPR2   | 2.7692  | 2.7188  | 2.0489  | 0.40210659  | 0.6951  |
| FKBP5   | -0.4702 | -0.4429 | -1.1512 | 0.401288587 | 0.69465 |
| IGBP1   | 0.2468  | -0.0438 | -0.5923 | 0.426104334 | 0.6938  |
| TPK1    | -2.1852 | -2.1994 | -2.8857 | 0.400397632 | 0.6934  |
| PEBP1   | 5.3069  | 5.4722  | 4.6962  | 0.408749022 | 0.69335 |
| CENPF   | 3.2472  | 3.3683  | 2.6145  | 0.404802203 | 0.69325 |
| DBNL    | 1.7431  | 1.7921  | 1.0753  | 0.400449764 | 0.6923  |
| NAA80   | -0.9033 | -0.5751 | -1.4308 | 0.431700896 | 0.6916  |
| NMI     | 0.8708  | 0.7386  | 0.1152  | 0.40353351  | 0.6895  |
| L1CAM   | -3.065  | -2.9254 | -3.6843 | 0.403928595 | 0.6891  |
| PSCA    | -6.0512 | -5.5664 | -6.4979 | 0.465879845 | 0.6891  |
| CD200R1 | -9.9198 | -7.7639 | -9.5295 | 1.148737152 | 0.68765 |
| IGSF8   | 1.3166  | 1.5624  | 0.7552  | 0.413755048 | 0.6843  |
| CD46    | 4.8432  | 5.1735  | 4.325   | 0.427703476 | 0.68335 |
| IFNGR1  | -1.6342 | -1.239  | -2.1199 | 0.441224119 | 0.6833  |
| CLEC6A  | -2.3683 | -1.9137 | -2.8236 | 0.454950045 | 0.6826  |
| IL17A   | -0.6718 | -0.4885 | -1.2622 | 0.404306554 | 0.68205 |
| ECHS1   | -0.6371 | -0.7937 | -1.3969 | 0.401179478 | 0.6815  |
| NAGK    | -1.4343 | -1.2706 | -2.0337 | 0.401746118 | 0.68125 |
| BLMH    | 1.3718  | 1.2836  | 0.6465  | 0.395755762 | 0.6812  |
| STAMBP  | 0.3686  | 0.2477  | -0.3711 | 0.396796829 | 0.67925 |
| CNPY4   | -1.2431 | -1.9225 | -2.2618 | 0.518725769 | 0.679   |
| AP3B1   | 0.6093  | 1.0592  | 0.1571  | 0.451050489 | 0.67715 |
| STAT5B  | -1.5369 | -1.5861 | -2.2374 | 0.391005665 | 0.6759  |
| GATD3   | -1.8219 | -1.1277 | -2.1507 | 0.522263037 | 0.6759  |
| THAP12  | 1.253   | 1.3144  | 0.6081  | 0.391264118 | 0.6756  |
| SLC44A4 | -0.5473 | -0.6726 | -1.2846 | 0.394515606 | 0.67465 |
| TOP2B   | 3.4127  | 3.4783  | 2.771   | 0.390801642 | 0.6745  |



|          |         |         |         |             |         |
|----------|---------|---------|---------|-------------|---------|
| TAB2     | 1.4079  | 1.2971  | 0.6795  | 0.392486297 | 0.673   |
| SH3BGR2  | 0.3563  | 0.0902  | -0.4491 | 0.410350025 | 0.67235 |
| NECTIN1  | -0.7037 | -1.1091 | -1.5787 | 0.437892361 | 0.6723  |
| CCL4     | 3.9717  | 4.1147  | 3.371   | 0.394626232 | 0.6722  |
| S100A4   | 2.4251  | 2.4349  | 1.7594  | 0.387202096 | 0.6706  |
| MANF     | 2.3251  | 2.4303  | 1.7079  | 0.390270129 | 0.6698  |
| RAB10    | 2.9255  | 2.6833  | 2.1347  | 0.405172276 | 0.6697  |
| CD70     | -3.9853 | -3.5743 | -4.4494 | 0.437818421 | 0.6696  |
| AZI2     | 1.3891  | 0.9038  | 0.4779  | 0.45592257  | 0.66855 |
| ACTN4    | 2.1405  | 2.0984  | 1.4522  | 0.385811642 | 0.66725 |
| LILRA4   | -0.6799 | -0.6625 | -1.3377 | 0.384902291 | 0.6665  |
| MDH1     | 7.5192  | 7.5701  | 6.8783  | 0.385558223 | 0.66635 |
| TXNDC5   | 2.9797  | 2.9227  | 2.2855  | 0.385397301 | 0.6657  |
| NIT1     | -1.413  | -1.7294 | -2.2368 | 0.415573932 | 0.6656  |
| P4HB     | 0.3919  | 0.5354  | -0.2019 | 0.390896828 | 0.66555 |
| PLA2G4A  | -0.2829 | -0.3382 | -0.9754 | 0.384845896 | 0.66485 |
| LMNB2    | 1.7805  | 1.7727  | 1.1122  | 0.383611344 | 0.6644  |
| MCEMP1   | 1.1759  | 1.1993  | 0.5239  | 0.383365952 | 0.6637  |
| HAVCR2   | -3.8756 | -3.3651 | -4.2838 | 0.460298305 | 0.66345 |
| NHLRC3   | -1.2803 | -1.1109 | -1.8585 | 0.391985833 | 0.6629  |
| IL1B     | 2.4954  | 2.4466  | 1.8089  | 0.383041551 | 0.6621  |
| L3HYPDH  | 1.6547  | 1.26    | 0.7953  | 0.430174875 | 0.66205 |
| SPRY2    | 0.5231  | 0.7116  | -0.0422 | 0.392281952 | 0.65955 |
| PHLDB1   | 0.2186  | 0.5832  | -0.2586 | 0.422153258 | 0.6595  |
| CALCOCO2 | 3.359   | 3.3603  | 2.7002  | 0.38073419  | 0.65945 |
| AKR7L    | -1.5327 | -1.5112 | -2.1803 | 0.380250536 | 0.65835 |
| DNPEP    | -1.799  | -1.7374 | -2.4262 | 0.381142983 | 0.658   |
| PPP1R9B  | 0.1598  | 0.5522  | -0.3019 | 0.427518315 | 0.6579  |
| DCTD     | 2.5353  | 2.737   | 1.9788  | 0.392692072 | 0.65735 |
| IL16     | -3.0181 | -3.2238 | -3.7781 | 0.393099008 | 0.65715 |
| LYAR     | 2.628   | 2.9105  | 2.1134  | 0.404142677 | 0.65585 |
| SNU13    | 1.1669  | 1.1587  | 0.507   | 0.378648505 | 0.6558  |
| PARP1    | 2.2825  | 2.3304  | 1.6527  | 0.378201829 | 0.65375 |
| TBL1X    | 2.0193  | 2.284   | 1.498   | 0.399919946 | 0.65365 |
| ADGRE2   | 0.0078  | 0.1074  | -0.5951 | 0.380112882 | 0.6527  |
| CALB2    | 5.5991  | 5.4745  | 4.8842  | 0.381894676 | 0.6526  |
| HHEX     | 0.346   | 0.2803  | -0.3389 | 0.37789177  | 0.65205 |
| EPHA10   | -1.5916 | -1.9391 | -2.4172 | 0.414518037 | 0.65185 |
| DPY30    | 2.0749  | 2.2078  | 1.4901  | 0.381826038 | 0.65125 |
| LILRB2   | -5.9496 | -6.0973 | -6.6745 | 0.383069867 | 0.65105 |
| RRM2B    | 0.4363  | 0.3043  | -0.2803 | 0.38137836  | 0.6506  |
| VSIR     | -1.7389 | -1.4144 | -2.2266 | 0.408823593 | 0.64995 |
| UROD     | 1.3096  | 1.5174  | 0.7645  | 0.388838711 | 0.649   |
| CERT     | 2.5228  | 2.1495  | 1.6874  | 0.418485854 | 0.64875 |
| YTHDF3   | 0.5445  | 0.2478  | -0.251  | 0.402005925 | 0.64715 |
| RP2      | 0.3603  | 0.4036  | -0.2651 | 0.374201314 | 0.64705 |
| ENTR1    | 0.0732  | 0.0242  | -0.593  | 0.371294869 | 0.6417  |
| DCTN2    | 1.3933  | 0.9087  | 0.5096  | 0.442538823 | 0.6414  |
| PROK1    | -3.8324 | -3.5536 | -4.3342 | 0.395573221 | 0.6412  |
| DCTPP1   | 4.0553  | 4.0827  | 3.4282  | 0.370219624 | 0.6408  |

|         |         |         |         |             |         |
|---------|---------|---------|---------|-------------|---------|
| CRKL    | 1.7828  | 1.8617  | 1.1818  | 0.371862479 | 0.64045 |
| SNAP29  | 1.8762  | 1.9288  | 1.2621  | 0.370669318 | 0.6404  |
| DDC     | 0.1473  | 0.1532  | -0.4886 | 0.368852016 | 0.63885 |
| CRYBB1  | 3.7807  | 3.7464  | 3.1248  | 0.369181044 | 0.63875 |
| MVK     | -1.0559 | -0.8502 | -1.5913 | 0.382577848 | 0.63825 |
| ZBTB17  | 0.759   | 0.6685  | 0.0758  | 0.371089787 | 0.63795 |
| ENO2    | 2.4383  | 2.3606  | 1.7623  | 0.369904533 | 0.63715 |
| OPTC    | -1.9779 | -1.7101 | -2.4796 | 0.390629829 | 0.6356  |
| PRDX1   | 2.1564  | 2.0137  | 1.4503  | 0.373354179 | 0.63475 |
| PDIA4   | 5.297   | 5.4684  | 4.7483  | 0.376163453 | 0.6344  |
| TGM2    | -1.086  | -1.2692 | -1.8089 | 0.375815278 | 0.6313  |
| CD22    | -4.0596 | -3.9202 | -4.6204 | 0.370632127 | 0.6305  |
| MPIG6B  | -5.3698 | -4.0857 | -5.3575 | 0.737850407 | 0.62975 |
| PTPRB   | -5.0226 | -5.6047 | -5.9415 | 0.464874868 | 0.62785 |
| SUMF2   | 0.0787  | 0.1745  | -0.5005 | 0.36521119  | 0.6271  |
| ADGRG1  | -5.5023 | -4.5091 | -5.6326 | 0.614502045 | 0.6269  |
| ACRV1   | -1.4458 | -1.5996 | -2.1495 | 0.369963543 | 0.6268  |
| CASP8   | 0.1277  | 0.2745  | -0.4254 | 0.369082163 | 0.6265  |
| STIP1   | 6.6764  | 6.711   | 6.069   | 0.361085382 | 0.6247  |
| SRC     | -0.8273 | -0.6499 | -1.3609 | 0.370072227 | 0.6223  |
| IGF2R   | -0.2917 | -0.2975 | -0.9167 | 0.35918131  | 0.6221  |
| GLRX    | 0.4893  | 0.6095  | -0.0724 | 0.36399234  | 0.6218  |
| SGSH    | -1.6603 | -1.6868 | -2.2945 | 0.358750419 | 0.62095 |
| POLR2F  | 3.4644  | 3.3986  | 2.8107  | 0.359925858 | 0.6208  |
| RIDA    | -1.981  | -1.8965 | -2.5578 | 0.359897249 | 0.61905 |
| FBP1    | 1.9413  | 1.6269  | 1.1658  | 0.390055727 | 0.6183  |
| ASAH2   | -6.6859 | -6.5432 | -7.2328 | 0.364008026 | 0.61825 |
| PFDN6   | -1.7335 | -1.3864 | -2.1778 | 0.396693597 | 0.61785 |
| CD79B   | -8.8715 | -8.8876 | -9.4972 | 0.356691244 | 0.61765 |
| ZPR1    | 0.5956  | 0.6359  | -0.0012 | 0.356765735 | 0.61695 |
| LGALS1  | 3.9138  | 3.7604  | 3.2205  | 0.364163072 | 0.6166  |
| PAFAH2  | -0.2876 | -0.5412 | -1.0305 | 0.3776303   | 0.6161  |
| SCLY    | -4.5307 | -4.387  | -5.0746 | 0.36269148  | 0.61575 |
| NUDT5   | 6.2273  | 6.3266  | 5.6631  | 0.357867382 | 0.61385 |
| TWF2    | 5.3301  | 5.6744  | 4.8893  | 0.393537194 | 0.61295 |
| C9orf40 | -1.4794 | -1.0316 | -1.8681 | 0.418597814 | 0.6126  |
| FADD    | 2.107   | 2.2928  | 1.5885  | 0.365011959 | 0.6114  |
| CHMP1A  | 1.9885  | 1.7391  | 1.2526  | 0.374261811 | 0.6112  |
| TRIM5   | 1.4982  | 1.7557  | 1.0161  | 0.375440812 | 0.61085 |
| CRELD2  | -0.8047 | -0.7347 | -1.3802 | 0.354205802 | 0.6105  |
| MAPK9   | 0.7773  | 1.0021  | 0.2802  | 0.369410129 | 0.6095  |
| IGFBP6  | -5.0103 | -4.7587 | -5.4936 | 0.373487943 | 0.6091  |
| MYCBP2  | 1.55    | 1.5408  | 0.9366  | 0.351520943 | 0.6088  |
| SSC5D   | 0.249   | 0.5361  | -0.2152 | 0.379112943 | 0.60775 |
| RBM17   | 1.754   | 1.5251  | 1.0324  | 0.368749025 | 0.60715 |
| PON1    | -4.4105 | -4.8822 | -5.2523 | 0.421920636 | 0.60595 |
| S100A11 | 1.9931  | 1.9476  | 1.3646  | 0.35046909  | 0.60575 |
| PSMD9   | 0.0968  | -0.0303 | -0.5714 | 0.354832087 | 0.60465 |
| HTRA2   | -0.1373 | 0.0311  | -0.657  | 0.358684694 | 0.6039  |
| KIFBP   | 1.1023  | 1.5295  | 0.7126  | 0.408593429 | 0.6033  |

|           |         |         |         |             |         |
|-----------|---------|---------|---------|-------------|---------|
| ITIH5     | -0.3804 | -0.7349 | -1.1608 | 0.390743995 | 0.60315 |
| GTPBP2    | 0.5001  | 0.5604  | -0.0726 | 0.349359027 | 0.60285 |
| ARID4B    | 2.0121  | 1.9139  | 1.3612  | 0.350901539 | 0.6018  |
| NARS1     | 3.327   | 3.2216  | 2.673   | 0.351137941 | 0.6013  |
| TXNRD1    | 5.2943  | 5.3599  | 4.7265  | 0.348304407 | 0.6006  |
| CREB3     | -0.9003 | -0.2299 | -1.1638 | 0.481497252 | 0.5987  |
| CACNB3    | 0.7001  | 0.1736  | -0.1611 | 0.434145095 | 0.59795 |
| TNFRSF11A | -5.1545 | -5.2003 | -5.7753 | 0.345956471 | 0.5979  |
| LRPAP1    | 1.5067  | 1.597   | 0.954   | 0.348109269 | 0.59785 |
| AHCY      | 5.1895  | 5.0891  | 4.5419  | 0.348543101 | 0.5974  |
| DTYMK     | 2.7094  | 2.8637  | 2.1911  | 0.352333682 | 0.59545 |
| ACYP1     | 2.5577  | 2.7513  | 2.0591  | 0.357123639 | 0.5954  |
| QPCT      | -5.6021 | -5.5984 | -6.1956 | 0.343730461 | 0.59535 |
| ARL13B    | 0.1056  | 0.3735  | -0.3557 | 0.36884973  | 0.59525 |
| GSTT2B    | -4.7593 | -4.4802 | -5.2142 | 0.3704922   | 0.59445 |
| FAM3B     | -7.667  | -6.7475 | -7.8011 | 0.573517803 | 0.59385 |
| VPS4B     | 0.4349  | 0.4006  | -0.176  | 0.343230452 | 0.59375 |
| CORO1A    | 8.9597  | 9.0509  | 8.4118  | 0.345678237 | 0.5935  |
| DNAJA2    | 1.9364  | 2.1979  | 1.474   | 0.366566779 | 0.59315 |
| FGL1      | -4.264  | -4.7464 | -5.0977 | 0.418564439 | 0.5925  |
| ACOT13    | -0.0079 | -0.6218 | -0.9073 | 0.459583837 | 0.59245 |
| ENPP6     | -6.3917 | -6.9386 | -7.2569 | 0.437604376 | 0.59175 |
| TNFRSF9   | -3.2314 | -3.6799 | -4.0459 | 0.407945768 | 0.59025 |
| PRTFDC1   | -2.7599 | -1.118  | -2.529  | 0.888826138 | 0.59005 |
| SIRT1     | 1.1048  | 1.0747  | 0.5022  | 0.339555842 | 0.58755 |
| PDCD5     | 4.049   | 3.962   | 3.4183  | 0.341799449 | 0.5872  |
| CYTH3     | 0.7259  | 1.3714  | 0.4615  | 0.468062606 | 0.58715 |
| GGT1      | -0.3787 | -0.142  | -0.8474 | 0.359002261 | 0.58705 |
| PLPBP     | 2.256   | 2.4317  | 1.757   | 0.350021804 | 0.58685 |
| SUOX      | 0.1938  | 0.0554  | -0.4616 | 0.345444815 | 0.5862  |
| RNF43     | -1.9015 | -1.9719 | -2.5229 | 0.340268306 | 0.5862  |
| SCARB2    | -4.8774 | -4.773  | -5.4109 | 0.342159324 | 0.5857  |
| GSR       | 5.1581  | 5.2671  | 4.6271  | 0.342403758 | 0.5855  |
| DYNLT1    | 1.3976  | 1.4857  | 0.8569  | 0.340467213 | 0.58475 |
| ING1      | 3.1102  | 2.706   | 2.3238  | 0.393251285 | 0.5843  |
| CRYZL1    | 1.5303  | 1.4574  | 0.9127  | 0.337501175 | 0.58115 |
| SYAP1     | 1.2747  | 1.3946  | 0.7543  | 0.340386119 | 0.58035 |
| ADA       | -0.9377 | -0.9014 | -1.4997 | 0.335441147 | 0.58015 |
| BATF      | -0.7288 | -0.3543 | -1.1196 | 0.38267893  | 0.57805 |
| BIRC2     | -1.0599 | -0.6506 | -1.4317 | 0.3907      | 0.57645 |
| PIK3AP1   | -1.6924 | -1.1475 | -1.9961 | 0.429975127 | 0.57615 |
| IMMT      | 1.2414  | 1.2731  | 0.6816  | 0.332729415 | 0.57565 |
| TCN2      | -0.536  | -0.4945 | -1.0905 | 0.332768313 | 0.57525 |
| GGACT     | 2.9537  | 2.9545  | 2.379   | 0.332034381 | 0.5751  |
| METAP2    | 0.4335  | 0.4347  | -0.1399 | 0.331399598 | 0.574   |
| CCL14     | -7.9379 | -7.5705 | -8.3253 | 0.377444159 | 0.5711  |
| IL4R      | -1.8871 | -1.9322 | -2.4799 | 0.330005338 | 0.57025 |
| PAXX      | 1.8022  | 1.9873  | 1.3252  | 0.341605869 | 0.56955 |
| ATP5F1D   | -0.1378 | -0.482  | -0.8791 | 0.37096445  | 0.5692  |
| CD93      | -7.1238 | -6.392  | -7.3257 | 0.49127225  | 0.5678  |

|          |         |         |         |             |         |
|----------|---------|---------|---------|-------------|---------|
| CLMP     | -6.5861 | -6.9195 | -7.3206 | 0.367769634 | 0.5678  |
| FARSA    | 0.0087  | 0.1792  | -0.4737 | 0.338639046 | 0.56765 |
| TLR3     | -3.5168 | -3.463  | -4.0573 | 0.328691137 | 0.5674  |
| ESYT2    | 1.4476  | 1.4283  | 0.871   | 0.32747095  | 0.56695 |
| AHNAK2   | -0.3994 | -0.718  | -1.1244 | 0.363384993 | 0.5657  |
| SRPX     | -1.7506 | -1.9084 | -2.395  | 0.335889803 | 0.5655  |
| LCP1     | 4.7551  | 4.7174  | 4.1719  | 0.32637243  | 0.56435 |
| HNRNPUL1 | 0.7682  | 0.9434  | 0.2929  | 0.336589607 | 0.5629  |
| STX6     | 1.4313  | 1.3423  | 0.8241  | 0.327908544 | 0.5627  |
| CPA4     | -4.2282 | -4.3372 | -4.8451 | 0.329243836 | 0.5624  |
| NAMPT    | -0.3859 | -0.0772 | -0.7939 | 0.359494687 | 0.56235 |
| ITGB1BP1 | 0.3715  | 0.4245  | -0.1641 | 0.325608743 | 0.5621  |
| ACOX1    | 1.0253  | 0.5117  | 0.2066  | 0.413751266 | 0.5619  |
| GBA      | 0.3532  | -0.1972 | -0.483  | 0.425020047 | 0.561   |
| SH2B3    | -2.6252 | -2.218  | -2.9823 | 0.382423574 | 0.5607  |
| SMPDL3A  | -5.0943 | -5.2652 | -5.7403 | 0.334724469 | 0.56055 |
| ARL2BP   | 2.2649  | 1.7422  | 1.4435  | 0.415759333 | 0.56005 |
| KLK15    | -2.0249 | -2.4287 | -2.7862 | 0.38088458  | 0.5594  |
| GGCT     | 2.2493  | 2.2552  | 1.6938  | 0.322434753 | 0.55845 |
| ARSA     | 0.0603  | 0.1455  | -0.455  | 0.324908546 | 0.5579  |
| LHPP     | 3.0197  | 3.0004  | 2.4523  | 0.322161673 | 0.55775 |
| PPCDC    | 0.7513  | 0.7869  | 0.2115  | 0.322422228 | 0.5576  |
| HMMR     | 1.3257  | 1.7371  | 0.974   | 0.381939013 | 0.5574  |
| EXOSC10  | 0.5139  | 0.3165  | -0.1421 | 0.336555275 | 0.5573  |
| ANXA11   | -2.4208 | -2.4317 | -2.9833 | 0.321659142 | 0.55705 |
| NUB1     | -0.1715 | 0.0373  | -0.6227 | 0.337337339 | 0.5556  |
| TANK     | 0.8849  | 1.2574  | 0.5163  | 0.37055171  | 0.55485 |
| LYN      | 2.893   | 2.7839  | 2.2843  | 0.324555763 | 0.55415 |
| EPPK1    | -0.89   | -0.9697 | -1.483  | 0.321837946 | 0.55315 |
| LRP2     | -1.9914 | -0.8421 | -1.969  | 0.657177787 | 0.55225 |
| TOR1AIP1 | -0.5223 | -0.8012 | -1.2136 | 0.347791762 | 0.55185 |
| GLOD4    | 1.4441  | 1.5677  | 0.9544  | 0.324350618 | 0.5515  |
| RNF41    | 1.1372  | 1.1586  | 0.5972  | 0.318126788 | 0.5507  |
| ROR1     | -4.1469 | -3.9066 | -4.5774 | 0.339864429 | 0.55065 |
| SHMT1    | 2.004   | 2.2159  | 1.5598  | 0.334833904 | 0.55015 |
| WARS     | 4.4125  | 4.4768  | 3.8956  | 0.318620344 | 0.54905 |
| IL2RA    | -5.6267 | -5.8754 | -6.2986 | 0.339705642 | 0.54755 |
| ENO1     | 3.1418  | 3.1304  | 2.5887  | 0.316092935 | 0.5474  |
| TSNAX    | 1.0725  | 0.8602  | 0.4193  | 0.333200225 | 0.54705 |
| HARS1    | 5.6512  | 5.7277  | 5.1442  | 0.317115515 | 0.54525 |
| FAM171B  | -1.3925 | -1.5584 | -2.0207 | 0.325545527 | 0.54525 |
| SIGLEC8  | 1.2478  | 1.0698  | 0.6136  | 0.327111622 | 0.5452  |
| SV2A     | -0.2515 | -0.7183 | -1.029  | 0.391352991 | 0.5441  |
| NT5C     | 2.1831  | 2.0621  | 1.5792  | 0.31951229  | 0.5434  |
| FUCA1    | 0.3882  | 0.3175  | -0.1882 | 0.314369194 | 0.54105 |
| CSTB     | 4.6019  | 4.5091  | 4.0151  | 0.315431472 | 0.5404  |
| GFAP     | -2.2964 | -1.7376 | -2.557  | 0.418645865 | 0.54    |
| EEF1D    | 5.178   | 5.2392  | 4.6702  | 0.312347904 | 0.5384  |
| STX7     | -2.3119 | -2.451  | -2.9198 | 0.31850292  | 0.53835 |
| PYY      | -1.9052 | -3.0332 | -3.0064 | 0.64365411  | 0.5372  |

|             |         |         |         |             |         |
|-------------|---------|---------|---------|-------------|---------|
| NID2        | -2.2018 | -2.4668 | -2.8714 | 0.337216627 | 0.5371  |
| FUS         | 0.8304  | 0.7773  | 0.267   | 0.311085535 | 0.53685 |
| DKK3        | -5.0011 | -4.9546 | -5.5137 | 0.310245553 | 0.53585 |
| SERPINB6    | -0.0886 | -0.2379 | -0.6984 | 0.317859188 | 0.53515 |
| ABCA2       | -1.6511 | -2.7078 | -2.7136 | 0.611767219 | 0.53415 |
| DNM1        | -3.6923 | -3.8251 | -4.2917 | 0.314809932 | 0.533   |
| BANK1       | -2.0392 | -2.2162 | -2.6606 | 0.320145363 | 0.5329  |
| RFC4        | 1.0317  | 1.0746  | 0.5203  | 0.308387975 | 0.53285 |
| XIAP        | 1.3185  | 1.3616  | 0.8075  | 0.308222166 | 0.53255 |
| GAPDH       | -1.7347 | -1.6857 | -2.2421 | 0.308068369 | 0.5319  |
| IL5         | -0.346  | -1.1143 | -1.2609 | 0.49139571  | 0.53075 |
| VNN2        | -4.69   | -4.5519 | -5.1516 | 0.314055797 | 0.53065 |
| HSPA2       | -0.6032 | -0.6165 | -1.1402 | 0.306269919 | 0.53035 |
| CD300E      | -6.7629 | -6.9988 | -7.4105 | 0.327752818 | 0.52965 |
| ALCAM       | -4.4986 | -4.568  | -5.0626 | 0.307555285 | 0.5293  |
| RILP        | -0.5276 | -0.3649 | -0.9753 | 0.31609459  | 0.52905 |
| SCGB2A2     | 0.3668  | 0.2597  | -0.2156 | 0.309992005 | 0.52885 |
| RNF31       | -0.2081 | -0.5294 | -0.8975 | 0.34496465  | 0.52875 |
| MECR        | 0.1588  | -0.2811 | -0.5882 | 0.375462253 | 0.52705 |
| CASP3       | 5.9403  | 5.911   | 5.4024  | 0.302453539 | 0.52325 |
| HMOX2       | 1.1683  | 1.3237  | 0.7239  | 0.311287798 | 0.5221  |
| APOBR       | -0.5414 | -0.6044 | -1.0939 | 0.302444347 | 0.521   |
| MORF4L1     | 1.2383  | 1.6466  | 0.9215  | 0.363510921 | 0.52095 |
| DNPH1       | 1.4802  | 1.6179  | 1.0286  | 0.308268914 | 0.52045 |
| SWAP70      | -0.2386 | -0.2048 | -0.7405 | 0.300005706 | 0.5188  |
| CRIB-OID305 | 1.4688  | 1.2002  | 0.8164  | 0.327890774 | 0.5181  |
| CA1         | -6.7837 | -6.4074 | -7.1132 | 0.353158505 | 0.51765 |
| MARS1       | 5.0532  | 5.2211  | 4.6197  | 0.310320968 | 0.51745 |
| MYL6B       | -1.9053 | -2.2732 | -2.6059 | 0.350447347 | 0.51665 |
| UPK3BL1     | -1.0249 | -0.5068 | -1.2823 | 0.394985785 | 0.51645 |
| TPT1        | 0.7339  | -0.3101 | -0.3045 | 0.601143621 | 0.5164  |
| HK2         | 6.1624  | 6.0281  | 5.5808  | 0.304513913 | 0.51445 |
| EFCAB2      | 1.4743  | 1.481   | 0.9635  | 0.296863543 | 0.51415 |
| PDLIM5      | -0.7091 | -0.55   | -1.1425 | 0.306649806 | 0.51295 |
| PQBP1       | 2.2804  | 2.1603  | 1.7078  | 0.301952264 | 0.51255 |
| LTB         | -1.9883 | -1.2618 | -2.137  | 0.468310613 | 0.51195 |
| SAMD9L      | 0.8951  | 0.8525  | 0.3619  | 0.296312155 | 0.5119  |
| ARAF        | 0.3394  | 0.6569  | -0.0137 | 0.335457454 | 0.51185 |
| HYOU1       | 0.4065  | 0.8239  | 0.1035  | 0.361710732 | 0.5117  |
| AGBL2       | -1.2139 | -1.7083 | -1.9721 | 0.384900212 | 0.511   |
| SCT         | -0.7849 | -1.1843 | -1.4954 | 0.35616331  | 0.5108  |
| NADK        | 2.6498  | 2.6776  | 2.153   | 0.295180239 | 0.5107  |
| PAEP        | -5.4107 | -5.6867 | -6.0579 | 0.324764859 | 0.5092  |
| NFKBIE      | 1.2815  | 1.3164  | 0.7919  | 0.293265073 | 0.50705 |
| ASAH1       | 2.0415  | 2.1147  | 1.5725  | 0.294193836 | 0.5056  |
| RRAS        | 0.1704  | -0.2144 | -0.5276 | 0.349611518 | 0.5056  |
| DOK2        | 2.4314  | 2.2792  | 1.8498  | 0.301608952 | 0.5055  |
| NUDT2       | -0.2933 | 0.2517  | -0.5257 | 0.399037492 | 0.5049  |
| DTX2        | -0.8617 | -1.4631 | -1.6671 | 0.41872169  | 0.5047  |
| CRIB-OID302 | 1.0979  | 1.0837  | 0.5878  | 0.290493964 | 0.503   |

|             |         |         |         |             |         |
|-------------|---------|---------|---------|-------------|---------|
| CNP         | -1.0435 | -0.794  | -1.42   | 0.315139784 | 0.50125 |
| FCN1        | -4.1684 | -4.9212 | -5.0455 | 0.474598557 | 0.5007  |
| TIGIT       | -0.7164 | -1.1539 | -1.4358 | 0.362493729 | 0.50065 |
| NPTN        | -2.7454 | -3.0781 | -3.4119 | 0.333250151 | 0.50015 |
| DDX1        | 1.4303  | 1.0543  | 0.7431  | 0.34410882  | 0.4992  |
| FUT8        | -5.1902 | -4.8873 | -5.5377 | 0.325454764 | 0.49895 |
| RAB39B      | -0.8109 | -1.0968 | -1.4525 | 0.321432175 | 0.49865 |
| PARK7       | 5.0044  | 5.0312  | 4.5203  | 0.287544159 | 0.4975  |
| ADAM8       | -7.5157 | -6.1421 | -7.3231 | 0.743710598 | 0.4942  |
| ERBB4       | -6.7486 | -6.8032 | -7.2697 | 0.286399668 | 0.4938  |
| BCAT1       | 1.9301  | 1.8552  | 1.3989  | 0.287516127 | 0.49375 |
| RYR1        | -0.2208 | -0.0363 | -0.6217 | 0.299292003 | 0.49315 |
| VTA1        | 2.3512  | 2.3501  | 1.8587  | 0.284027997 | 0.49195 |
| DBN1        | -0.5094 | -0.917  | -1.2043 | 0.349181199 | 0.4911  |
| CLIC5       | -0.6288 | -0.74   | -1.1752 | 0.288766757 | 0.4908  |
| TBCC        | -0.6375 | -0.6682 | -1.1423 | 0.283000689 | 0.48945 |
| NOS1        | -4.8827 | -3.7059 | -4.7828 | 0.652501834 | 0.4885  |
| DDX58       | 0.3129  | 0.7242  | 0.0301  | 0.349026823 | 0.48845 |
| IL36G       | -2.295  | -4.1984 | -3.7344 | 0.992480052 | 0.4877  |
| CCL3        | -1.1077 | -1.0971 | -1.5888 | 0.28087318  | 0.4864  |
| MSRA        | 0.7839  | 0.7513  | 0.2812  | 0.281295829 | 0.4864  |
| FKBP4       | -0.3614 | -0.4489 | -0.8907 | 0.283725801 | 0.48555 |
| CNGB3       | -0.4279 | -0.5869 | -0.9925 | 0.291137287 | 0.4851  |
| PSTPIP2     | -2.0089 | -1.7646 | -2.3716 | 0.305418505 | 0.48485 |
| CRIB-OID314 | 0.7699  | 1.0102  | 0.4058  | 0.304305838 | 0.48425 |
| HMGCS1      | 1.9762  | 1.7027  | 1.3559  | 0.310870975 | 0.48355 |
| IQGAP2      | 3.542   | 3.6134  | 3.0943  | 0.281365142 | 0.4834  |
| DYNLT3      | -0.1702 | 0.2737  | -0.4316 | 0.356563519 | 0.48335 |
| CNST        | 0.5044  | 0.2771  | -0.0916 | 0.300782585 | 0.48235 |
| RHOC        | 0.7759  | 0.7573  | 0.2854  | 0.277976564 | 0.4812  |
| CD99L2      | 1.7309  | 1.809   | 1.2896  | 0.280065962 | 0.48035 |
| NPM1        | 4.6806  | 4.6153  | 4.1682  | 0.278901494 | 0.47975 |
| DHODH       | 0.82    | 0.4864  | 0.1738  | 0.323156866 | 0.4794  |
| VPS37A      | 0.2856  | 0.3976  | -0.1354 | 0.281032027 | 0.477   |
| UBE2L6      | 2.8842  | 2.8636  | 2.3977  | 0.275127068 | 0.4762  |
| RLN2        | -7.0289 | -6.4424 | -7.2078 | 0.400379949 | 0.47215 |
| CHRM1       | 0.0282  | -0.311  | -0.6132 | 0.320877817 | 0.4718  |
| GRSF1       | 1.0692  | 1.2266  | 0.6763  | 0.283424082 | 0.4716  |
| VASP        | 7.3858  | 7.4084  | 6.9257  | 0.2723974   | 0.4714  |
| LYSMD3      | -4.8793 | -4.7004 | -5.2604 | 0.286019352 | 0.47055 |
| CEP164      | 1.7911  | 1.7997  | 1.3266  | 0.270695961 | 0.4688  |
| CREG1       | -2.1965 | -2.0617 | -2.5974 | 0.27864743  | 0.4683  |
| REG1B       | -6.2335 | -7.0058 | -7.086  | 0.47075039  | 0.46635 |
| SLC9A3R1    | 1.7001  | 1.847   | 1.3073  | 0.279030327 | 0.46625 |
| TFPI2       | -5.2547 | -5.012  | -5.5979 | 0.294383067 | 0.46455 |
| GPRC5C      | 2.3163  | 2.5196  | 1.9535  | 0.286770506 | 0.46445 |
| MICALL2     | 0.2202  | -0.3324 | -0.5194 | 0.384565538 | 0.4633  |
| SRPK2       | 1.2326  | 1.2466  | 0.7763  | 0.267577957 | 0.4633  |
| C1QL2       | -2.4407 | -2.8452 | -3.1061 | 0.335272581 | 0.46315 |
| PFDN4       | 0.9927  | 0.6807  | 0.374   | 0.309353783 | 0.4627  |

|           |         |         |         |             |         |
|-----------|---------|---------|---------|-------------|---------|
| HCLS1     | -0.2509 | -0.1508 | -0.6633 | 0.271646222 | 0.46245 |
| APEX1     | 1.6115  | 1.707   | 1.1969  | 0.271175042 | 0.46235 |
| DNAJB1    | 0.0935  | 0.134   | -0.3485 | 0.267647311 | 0.46225 |
| GBP6      | 0.047   | 0.071   | -0.403  | 0.267005618 | 0.462   |
| TXLNA     | 4.5298  | 4.4748  | 4.0421  | 0.267115949 | 0.4602  |
| FCRL5     | -5.4966 | -5.4849 | -5.9507 | 0.265616685 | 0.45995 |
| CTRC      | -9.1823 | -8.7646 | -9.4331 | 0.33770455  | 0.45965 |
| LELP1     | -0.4255 | -1.1959 | -1.2692 | 0.467389691 | 0.4585  |
| HIP1R     | 2.7164  | 2.7188  | 2.26    | 0.264198208 | 0.4576  |
| CARHSP1   | -1.6385 | -1.1605 | -1.8571 | 0.356258689 | 0.4576  |
| RPE       | 1.7021  | 1.411   | 1.0991  | 0.301559784 | 0.45745 |
| DBH       | -7.8417 | -7.6125 | -8.1837 | 0.287450309 | 0.4566  |
| TRIM25    | 2.5192  | 2.6954  | 2.151   | 0.277785601 | 0.4563  |
| GPNMB     | -5.1218 | -4.776  | -5.4047 | 0.31487398  | 0.4558  |
| CDHR5     | -4.7028 | -4.825  | -5.2197 | 0.270156294 | 0.4558  |
| TSC22D1   | 0.8259  | 0.4834  | 0.1997  | 0.313559771 | 0.45495 |
| RAD23B    | -0.9758 | -1.2916 | -1.5882 | 0.306250159 | 0.4545  |
| DUT       | 8.3413  | 8.335   | 7.8839  | 0.262280276 | 0.45425 |
| DARS1     | 2.1791  | 2.0812  | 1.6783  | 0.265428415 | 0.45185 |
| CR1       | 1.0366  | 0.8464  | 0.4903  | 0.277316588 | 0.4512  |
| SCP2      | 0.1839  | 0.5734  | -0.0713 | 0.32467301  | 0.44995 |
| CCL19     | -8.9745 | -8.6137 | -9.2436 | 0.316060506 | 0.4495  |
| LRCH4     | -0.772  | -0.9885 | -1.3279 | 0.280205109 | 0.44765 |
| DSG4      | -2.3435 | -2.3778 | -2.8082 | 0.258961625 | 0.44755 |
| AMIGO1    | 0.3396  | -0.271  | -0.4125 | 0.399689258 | 0.4468  |
| PSME2     | 1.8313  | 1.7297  | 1.3339  | 0.262801243 | 0.4466  |
| MRPL24    | 0.1899  | 0.062   | -0.3199 | 0.265236391 | 0.44585 |
| NRP2      | -3.0667 | -2.6283 | -3.2931 | 0.337986824 | 0.4456  |
| TRAF3     | 1.089   | 1.1592  | 0.6809  | 0.258277803 | 0.4432  |
| TBC1D5    | -0.0424 | -0.0677 | -0.4979 | 0.255992311 | 0.44285 |
| MT1A_CKMT | -5.1179 | -4.9307 | -5.465  | 0.271108447 | 0.4407  |
| F2R       | -2.7866 | -2.8994 | -3.2827 | 0.260050617 | 0.4397  |
| XRCC4     | 2.2413  | 2.2091  | 1.7858  | 0.254198079 | 0.4394  |
| LILRB5    | -8.7039 | -8.65   | -9.1163 | 0.255086476 | 0.43935 |
| FYB1      | 2.8002  | 2.7816  | 2.3523  | 0.253396547 | 0.4386  |
| AGR3      | -3.6396 | -3.1644 | -3.8405 | 0.347200005 | 0.4385  |
| TYMP      | 0.6512  | 0.6108  | 0.1931  | 0.253627371 | 0.4379  |
| SCIN      | 1.0633  | -0.8659 | -0.3392 | 0.997182011 | 0.4379  |
| NTproBNP  | -2.9192 | -3.5205 | -3.6577 | 0.392803551 | 0.43785 |
| AG1A_CTAG | -0.3362 | -0.2831 | -0.7469 | 0.253838709 | 0.43725 |
| TMED1     | -0.5006 | -1.1032 | -1.2391 | 0.393060178 | 0.4372  |
| LRIG1     | -6.7213 | -6.3333 | -6.9637 | 0.317990021 | 0.4364  |
| CBS       | 2.2538  | 2.2558  | 1.8192  | 0.251495765 | 0.4356  |
| RCOR1     | 3.2571  | 3.1518  | 2.7695  | 0.256578494 | 0.43495 |
| SLITRK6   | -3.1439 | -3.446  | -3.7295 | 0.292849227 | 0.43455 |
| LGALS9    | 1.9706  | 2.0852  | 1.5945  | 0.256700493 | 0.4334  |
| TIMP4     | -6.8324 | -7.8125 | -7.7552 | 0.550066532 | 0.43275 |
| OPLAH     | 0.338   | 0.3471  | -0.0897 | 0.249601128 | 0.43225 |
| HAGH      | -4.2491 | -3.2297 | -4.1693 | 0.566920418 | 0.4299  |
| SH3BP1    | 1.3569  | 1.4352  | 0.9675  | 0.250501677 | 0.42855 |

|          |         |         |         |             |         |
|----------|---------|---------|---------|-------------|---------|
| TMSB10   | 5.7981  | 5.8686  | 5.4059  | 0.249293127 | 0.42745 |
| BID      | -3.344  | -3.2808 | -3.7398 | 0.248774624 | 0.4274  |
| BSND     | 0.2201  | 0.3742  | -0.1296 | 0.258150905 | 0.42675 |
| LSM8     | -1.0267 | -1.4768 | -1.6783 | 0.333610257 | 0.42655 |
| LRR59    | 2.6965  | 2.6376  | 2.2409  | 0.247794088 | 0.42615 |
| LMNB1    | -0.9626 | -1.2195 | -1.5167 | 0.277294146 | 0.42565 |
| ENTPD6   | -1.4903 | -1.3206 | -1.831  | 0.259930356 | 0.42555 |
| GPI      | 6.7987  | 6.9595  | 6.4536  | 0.258484513 | 0.4255  |
| BLVRB    | 1.3521  | 1.3844  | 0.943   | 0.246048796 | 0.42525 |
| DENR     | 1.933   | 1.8769  | 1.4797  | 0.247115337 | 0.42525 |
| CHRD1    | -5.8559 | -5.6259 | -6.1648 | 0.270410928 | 0.4239  |
| ERN1     | -2.1868 | -2.2843 | -2.6592 | 0.249405299 | 0.42365 |
| S100A14  | -1.2725 | -1.8533 | -1.9864 | 0.379626452 | 0.4235  |
| LYPD3    | -6.121  | -6.1246 | -6.5463 | 0.244514464 | 0.4235  |
| RTN4IP1  | -1.3073 | -1.3193 | -1.7357 | 0.243946552 | 0.4224  |
| ATXN3    | 0.3523  | 0.2219  | -0.1339 | 0.251657254 | 0.421   |
| KDR      | -6.2053 | -6.5413 | -6.7934 | 0.295045765 | 0.4201  |
| PILRB    | -1.259  | -1.389  | -1.744  | 0.251047804 | 0.42    |
| EGF      | -3.6222 | -3.5266 | -3.994  | 0.246926899 | 0.4196  |
| GFER     | 2.9821  | 3.0149  | 2.5806  | 0.241831408 | 0.4179  |
| GFRA2    | -3.6514 | -3.6153 | -4.05   | 0.241229234 | 0.41665 |
| CRIP2    | -0.9929 | -1.2471 | -1.5359 | 0.271683664 | 0.4159  |
| VPS53    | 1.0029  | 0.8755  | 0.5233  | 0.248425629 | 0.4159  |
| PRCP     | 0.158   | 0.1664  | -0.2536 | 0.24009898  | 0.4158  |
| LARP1    | 1.2789  | 1.3311  | 0.8895  | 0.241304704 | 0.4155  |
| SNX15    | 1.94    | 2.4853  | 1.7988  | 0.362530868 | 0.41385 |
| AMPD3    | -1.9024 | -1.8815 | -2.3054 | 0.238934098 | 0.41345 |
| PNPT1    | 1.0923  | 1.2646  | 0.765   | 0.253775734 | 0.41345 |
| NUDC     | 1.8027  | 1.933   | 1.455   | 0.247102334 | 0.41285 |
| LZTFL1   | 2.5806  | 2.8283  | 2.2926  | 0.268102524 | 0.41185 |
| DNAJA1   | 0.5568  | 0.6095  | 0.1719  | 0.238892954 | 0.41125 |
| CINP     | -0.143  | 0.3606  | -0.3003 | 0.345240269 | 0.4091  |
| BIN2     | 3.0286  | 2.9852  | 2.5981  | 0.237016251 | 0.4088  |
| SIRPA    | 0.4841  | 0.4934  | 0.0807  | 0.235633663 | 0.40805 |
| PTPN1    | 0.2908  | 0.0906  | -0.2157 | 0.2550954   | 0.4064  |
| RNASEH2A | -0.1486 | -0.2074 | -0.5839 | 0.236183467 | 0.4059  |
| IL25     | 0.9215  | 0.3906  | 0.2506  | 0.353921277 | 0.40545 |
| MAX      | 1.2045  | 1.0091  | 0.7016  | 0.253523773 | 0.4052  |
| CRHR1    | 0.1292  | 0.2021  | -0.2391 | 0.236508189 | 0.40475 |
| NFKB1    | 1.7299  | 1.5178  | 1.2192  | 0.256568009 | 0.40465 |
| PRR5     | -0.0251 | -1.3819 | -1.1073 | 0.717340951 | 0.4038  |
| PDRG1    | -0.3957 | -0.4438 | -0.8224 | 0.233710811 | 0.40265 |
| ARG1     | -3.8377 | -4.4595 | -4.5498 | 0.38770172  | 0.4012  |
| CCS      | -2.754  | -2.8144 | -3.1854 | 0.23359335  | 0.4012  |
| ATG16L1  | 0.8082  | 1.0251  | 0.5157  | 0.255633272 | 0.40095 |
| CCDC50   | 2.6458  | 2.6805  | 2.2623  | 0.232080295 | 0.40085 |
| ERI1     | 1.3107  | 1.1314  | 0.8209  | 0.247811346 | 0.40015 |
| EGLN1    | -1.1982 | -0.9894 | -1.4921 | 0.252547665 | 0.3983  |
| GLRX5    | 3.2221  | 3.4767  | 2.9514  | 0.262691118 | 0.398   |
| GOLGA3   | 1.0908  | 1.3101  | 0.803   | 0.254319923 | 0.39745 |



|          |         |         |         |             |         |
|----------|---------|---------|---------|-------------|---------|
| CPPED1   | 3.457   | 3.4418  | 3.0543  | 0.228237661 | 0.3951  |
| ATP5IF1  | 4.6077  | 4.7749  | 4.2967  | 0.242676767 | 0.3946  |
| CIAPIN1  | 3.4744  | 3.5883  | 3.1382  | 0.234020533 | 0.39315 |
| PHYKPL   | -2.0083 | -1.8749 | -2.3341 | 0.236222296 | 0.3925  |
| BNIP3L   | 0.3218  | -0.2986 | -0.3808 | 0.384122324 | 0.3924  |
| DDT      | 3.4078  | 3.4415  | 3.0328  | 0.226861331 | 0.39185 |
| FLT3     | -1.1425 | -1.0958 | -1.509  | 0.226287936 | 0.38985 |
| CLC      | 1.2328  | 1.0947  | 0.7743  | 0.235212677 | 0.38945 |
| BCHE     | -6.5075 | -6.1956 | -6.7378 | 0.272121462 | 0.38625 |
| PREB     | 2.0062  | 2.4142  | 1.8246  | 0.301957701 | 0.3856  |
| PMM2     | 1.0038  | 0.7346  | 0.4845  | 0.259708535 | 0.3847  |
| TDP1     | 1.2304  | 1.5349  | 0.9991  | 0.268732078 | 0.38355 |
| MAVS     | -2.1175 | -1.9516 | -2.4178 | 0.236306771 | 0.38325 |
| IRAK4    | -0.3564 | -0.3736 | -0.748  | 0.221292326 | 0.383   |
| TTF2     | 2.0184  | 1.8896  | 1.5711  | 0.230256734 | 0.3829  |
| GOLM2    | -3.3131 | -3.5259 | -3.8017 | 0.244975999 | 0.3822  |
| SLC27A4  | 0.9228  | 0.4502  | 0.3048  | 0.323113994 | 0.3817  |
| CEP85    | 3.4203  | 3.5427  | 3.1002  | 0.228492166 | 0.3813  |
| MET      | -3.4862 | -4.2278 | -4.2351 | 0.430285769 | 0.3781  |
| GRAP2    | -2.5591 | -2.4104 | -2.8612 | 0.229708779 | 0.37645 |
| IRAK1    | -0.0318 | 0.2694  | -0.2549 | 0.263117699 | 0.3737  |
| LAMP2    | -3.5559 | -3.7321 | -4.0177 | 0.233049723 | 0.3737  |
| SFTPA1   | -0.1964 | -0.3728 | -0.656  | 0.231858923 | 0.3714  |
| KHK      | -1.6394 | -1.7174 | -2.0491 | 0.217548071 | 0.3707  |
| SIRT2    | -1.2771 | -1.4123 | -1.7153 | 0.22439076  | 0.3706  |
| PTGES2   | 1.152   | 1.1428  | 0.7773  | 0.213726843 | 0.3701  |
| MYH4     | 0.5124  | -0.0927 | -0.1599 | 0.370281231 | 0.36975 |
| FGFBP2   | -6.5418 | -6.6398 | -6.9605 | 0.218998546 | 0.3697  |
| MPHOSPH8 | 4.1254  | 3.941   | 3.6639  | 0.232296513 | 0.3693  |
| ASRGL1   | 0.2467  | 0.6102  | 0.0593  | 0.280101714 | 0.36915 |
| CTRB1    | -5.7317 | -5.6973 | -6.081  | 0.212296781 | 0.3665  |
| IGF1R    | -2.8959 | -3.0605 | -3.3445 | 0.226932854 | 0.3663  |
| CLIP2    | 0.3871  | 0.5025  | 0.0791  | 0.218879236 | 0.3657  |
| NAP1L4   | -1.0947 | -1.1897 | -1.5076 | 0.216245162 | 0.3654  |
| CAPG     | 0.6452  | 0.7406  | 0.3275  | 0.216289181 | 0.3654  |
| RANBP1   | 0.0856  | -0.1862 | -0.4155 | 0.250850201 | 0.3652  |
| NT5C3A   | -1.2665 | -0.9093 | -1.4524 | 0.276015779 | 0.3645  |
| OTUD7B   | 1.2853  | 1.1814  | 0.8695  | 0.216397189 | 0.36385 |
| CTBS     | -0.5926 | -0.6869 | -1.0032 | 0.215069965 | 0.36345 |
| WASHC3   | 1.0376  | 1.0925  | 0.7018  | 0.211511284 | 0.36325 |
| SKAP2    | -0.4459 | -0.2615 | -0.7161 | 0.22864549  | 0.3624  |
| CST6     | -6.1159 | -6.3807 | -6.6107 | 0.247603877 | 0.3624  |
| ADD1     | 2.0012  | 2.0422  | 1.6604  | 0.209601559 | 0.3613  |
| GBP1     | -0.1009 | -0.4037 | -0.6135 | 0.257702231 | 0.3612  |
| GH1      | -5.4709 | -6.2483 | -6.2206 | 0.441053311 | 0.361   |
| GCC1     | 0.0475  | -0.0187 | -0.3463 | 0.210864348 | 0.3607  |
| NAAA     | -4.6954 | -6.0753 | -5.7458 | 0.720651837 | 0.36045 |
| FAM171A2 | -4.3603 | -3.5977 | -4.3393 | 0.434352069 | 0.3603  |
| SUGT1    | 0.5687  | 0.43    | 0.1399  | 0.218809331 | 0.35945 |
| LGALS8   | 3.2348  | 3.1359  | 2.8259  | 0.213338706 | 0.35945 |

|            |         |         |         |             |         |
|------------|---------|---------|---------|-------------|---------|
| SMNDC1     | 2.1389  | 2.1937  | 1.8069  | 0.209300932 | 0.3594  |
| KLK11      | -4.1289 | -3.9853 | -4.4146 | 0.21853449  | 0.3575  |
| COMMD1     | 0.1092  | 0.1552  | -0.2249 | 0.207450725 | 0.3571  |
| NDST1      | 0.1183  | 0.3242  | -0.1358 | 0.230420492 | 0.35705 |
| GOPC       | 0.7008  | 0.6762  | 0.3322  | 0.206077299 | 0.3563  |
| NDUFA5     | 0.2321  | 0.3755  | -0.0519 | 0.217520237 | 0.3557  |
| NTF3       | -3.1965 | -3.2061 | -3.5566 | 0.205188702 | 0.3553  |
| CEACAM18   | -1.4322 | -1.3899 | -1.7657 | 0.205846699 | 0.35465 |
| UBQLN3     | 0.1649  | -0.4952 | -0.5183 | 0.387949279 | 0.35315 |
| MYO9B      | -0.0625 | 0.1643  | -0.3017 | 0.233027495 | 0.3526  |
| ACADM      | -0.3782 | -0.3375 | -0.71   | 0.204329791 | 0.35215 |
| HMBS       | -0.3718 | -0.2728 | -0.6739 | 0.208944418 | 0.3516  |
| DPP7       | -1.0118 | -0.8705 | -1.2927 | 0.214912129 | 0.35155 |
| M6PR       | 0.6393  | 0.3841  | 0.1609  | 0.239378306 | 0.3508  |
| S100A3     | 0.551   | 0.2806  | 0.0657  | 0.24317835  | 0.3501  |
| METAP1D    | 1.2302  | 0.9084  | 0.7197  | 0.258125674 | 0.3496  |
| VEGFB      | -4.0524 | -4.4512 | -4.6013 | 0.283684878 | 0.3495  |
| OTUD6B     | 0.9199  | 0.7947  | 0.5085  | 0.210885214 | 0.3488  |
| TDRKH      | 0.2146  | 0.0907  | -0.1956 | 0.210389694 | 0.34825 |
| MST1       | -5.1143 | -5.2252 | -5.5179 | 0.208512614 | 0.34815 |
| NCLN       | 0.9628  | 0.8595  | 0.5633  | 0.207366656 | 0.34785 |
| COX6B1     | 1.7732  | 1.7914  | 1.4348  | 0.200835488 | 0.3475  |
| GADD45GIP1 | 1.929   | 1.6641  | 1.4501  | 0.239900403 | 0.34645 |
| CDC27      | 2.0746  | 2.0568  | 1.7197  | 0.199961355 | 0.346   |
| TPBGL      | -0.6928 | -1.0214 | -1.2025 | 0.258382552 | 0.3454  |
| HDGFL2     | 0.9889  | 1.0398  | 0.67    | 0.20043289  | 0.34435 |
| GLP1R      | 0.571   | 0.444   | 0.1642  | 0.208127877 | 0.3433  |
| STX8       | 1.0893  | 0.9182  | 0.6611  | 0.215534553 | 0.34265 |
| PRKCQ      | 0.1587  | 0.3689  | -0.0787 | 0.2239377   | 0.3425  |
| CCDC80     | -4.5229 | -4.4681 | -4.8374 | 0.199288643 | 0.3419  |
| PGR        | -0.9035 | -0.8682 | -1.2259 | 0.197119735 | 0.34005 |
| ILKAP      | 0.9934  | 0.8466  | 0.58    | 0.209573122 | 0.34    |
| IL2ORA     | 0.04    | -0.7449 | -0.6916 | 0.438586263 | 0.33915 |
| SDHB       | -0.365  | -0.5185 | -0.7796 | 0.209614177 | 0.33785 |
| GRHPR      | 0.1659  | 0.1018  | -0.2038 | 0.197559383 | 0.33765 |
| MELTF      | 0.7584  | 0.6084  | 0.3464  | 0.208521781 | 0.337   |
| ESR1       | 0.6758  | 0.5489  | 0.2785  | 0.202923245 | 0.33385 |
| MCFD2      | 0.5772  | 0.9795  | 0.4446  | 0.278551629 | 0.33375 |
| NECTIN2    | -0.0378 | 0.0417  | -0.3318 | 0.196747935 | 0.33375 |
| IL2RG      | -0.0128 | -0.0868 | -0.3834 | 0.196125776 | 0.3336  |
| SDCCAG8    | 2.1948  | 2.4515  | 1.9904  | 0.231043813 | 0.33275 |
| RNF5       | 0.451   | 0.3976  | 0.0924  | 0.193473754 | 0.3319  |
| TRAF2      | 1.21    | 1.1383  | 0.8428  | 0.19463512  | 0.33135 |
| TIMM10     | 3.5517  | 3.4758  | 3.1824  | 0.195032843 | 0.33135 |
| YARS1      | 0.2084  | 0.6804  | 0.1132  | 0.303744103 | 0.3312  |
| IGHMBP2    | 0.7653  | 0.5424  | 0.3229  | 0.221202178 | 0.33095 |
| ZNF75D     | -0.7106 | -1.1753 | -1.2729 | 0.300458855 | 0.32995 |
| DPT        | -8.9247 | -9.011  | -9.2977 | 0.195266305 | 0.32985 |
| LCN15      | -1.4563 | -1.2134 | -1.6645 | 0.225772326 | 0.32965 |
| IFIT1      | -0.5761 | -0.1879 | -0.7114 | 0.271740556 | 0.3294  |

|          |          |         |          |             |         |
|----------|----------|---------|----------|-------------|---------|
| RABGAP1L | -0.8774  | -0.1437 | -0.8393  | 0.413042907 | 0.32875 |
| CBX2     | -0.0691  | -0.1047 | -0.4152  | 0.190378054 | 0.3283  |
| TRPV3    | 0.5216   | 0.547   | 0.2062   | 0.189853874 | 0.3281  |
| MRI1     | -0.3495  | -0.4152 | -0.7101  | 0.192056788 | 0.32775 |
| CWC15    | 2.4831   | 2.5948  | 2.2135   | 0.196023272 | 0.32545 |
| COPE     | 0.4156   | 0.1839  | -0.025   | 0.220398299 | 0.32475 |
| REG4     | -11.0623 | -8.7966 | -10.2536 | 1.148204481 | 0.32415 |
| APPL2    | 0.4558   | 0.8843  | 0.3481   | 0.28364355  | 0.32195 |
| FASLG    | -8.0369  | -7.7061 | -8.1934  | 0.248791137 | 0.3219  |
| CHEK2    | 2.3705   | 2.1593  | 1.9444   | 0.213052677 | 0.3205  |
| LTBR     | -1.6526  | -1.4656 | -1.8796  | 0.207321811 | 0.3205  |
| ZNRD2    | 2.3781   | 2.3407  | 2.0402   | 0.185236524 | 0.3192  |
| IL10RB   | -4.5424  | -4.9148 | -5.0476  | 0.261898403 | 0.319   |
| DDA1     | 1.7823   | 1.5227  | 1.3336   | 0.225271192 | 0.3189  |
| PPME1    | 2.2782   | 2.2919  | 1.9671   | 0.18369628  | 0.31795 |
| RAB27B   | 1.9409   | 1.8096  | 1.5588   | 0.194139443 | 0.31645 |
| ARHGAP45 | 0.2784   | 0.7884  | 0.2171   | 0.313645601 | 0.3163  |
| ANK2     | 0.3761   | -0.0081 | -0.1318  | 0.26485019  | 0.3158  |
| FLRT2    | -4.5707  | -5.3206 | -5.2606  | 0.416715734 | 0.31495 |
| VAT1     | -1.9066  | -1.8072 | -2.1709  | 0.187977188 | 0.314   |
| BACH1    | 0.7796   | 0.7295  | 0.441    | 0.182753121 | 0.31355 |
| MED18    | 0.2596   | 0.4396  | 0.0364   | 0.201985346 | 0.3132  |
| TUBB3    | 4.8366   | 4.8354  | 4.5236   | 0.180365222 | 0.3124  |
| NEDD9    | -2.2291  | -1.6947 | -2.2739  | 0.322248103 | 0.312   |
| ABL1     | 0.0514   | 0.0717  | -0.2496  | 0.179929051 | 0.31115 |
| DDX25    | 1.0562   | 0.5171  | 0.4756   | 0.323894896 | 0.31105 |
| LY9      | -7.1292  | -7.4075 | -7.5792  | 0.227094613 | 0.31085 |
| SEZ6     | -2.1642  | -2.0832 | -2.4339  | 0.183616257 | 0.3102  |
| TNIP1    | 2.1073   | 2.0946  | 1.7909   | 0.179120044 | 0.31005 |
| FXN      | 0.8997   | 0.9576  | 0.6188   | 0.181219324 | 0.30985 |
| FGF6     | -0.1653  | -0.0301 | -0.4069  | 0.190887332 | 0.3092  |
| DAG1     | -0.2679  | -0.1065 | -0.4955  | 0.195436571 | 0.3083  |
| PACS2    | 0.8171   | 0.5744  | 0.388    | 0.215164689 | 0.30775 |
| CTSH     | -4.4915  | -4.4911 | -4.7978  | 0.176957971 | 0.3065  |
| PDZK1    | -1.2316  | -0.8004 | -1.3223  | 0.278848687 | 0.3063  |
| OGA      | 0.3819   | 0.4997  | 0.1347   | 0.18628369  | 0.3061  |
| IDUA     | -4.0723  | -3.9258 | -4.3042  | 0.19079938  | 0.30515 |
| FAM172A  | -0.0674  | -0.0416 | -0.3593  | 0.176448548 | 0.3048  |
| SBSN     | -1.9704  | -1.8204 | -2.1993  | 0.190814229 | 0.3039  |
| PXDNL    | -2.005   | -1.0637 | -1.8382  | 0.50228116  | 0.30385 |
| TSPAN8   | -5.2206  | -5.3524 | -5.5902  | 0.187316239 | 0.3037  |
| GIMAP7   | -3.7191  | -3.096  | -3.7095  | 0.357007941 | 0.30195 |
| FBN2     | 2.5661   | 2.2775  | 2.1204   | 0.226060044 | 0.3014  |
| CLNS1A   | 1.4117   | 1.1762  | 0.9926   | 0.210084911 | 0.30135 |
| COMP     | -7.2104  | -7.0518 | -7.4321  | 0.191020479 | 0.301   |
| SEMA4D   | 0.2681   | 0.0476  | -0.1411  | 0.204805835 | 0.29895 |
| WDR46    | -1.0654  | -0.775  | -1.219   | 0.225485077 | 0.2988  |
| CFHR5    | -8.9271  | -8.8016 | -9.1629  | 0.18343463  | 0.29855 |
| MAD1L1   | 2.6005   | 2.571   | 2.2872   | 0.172997871 | 0.29855 |
| CDH22    | -0.3324  | -0.0179 | -0.4736  | 0.233277439 | 0.29845 |

|          |         |         |         |             |         |
|----------|---------|---------|---------|-------------|---------|
| TK1      | 1.0287  | 1.3065  | 0.8692  | 0.221300843 | 0.2984  |
| CMIP     | -0.0682 | -0.2129 | -0.4385 | 0.18661705  | 0.29795 |
| SAFB2    | 0.8515  | 0.6988  | 0.4774  | 0.188098405 | 0.29775 |
| NFX1     | -1.2591 | -0.4746 | -1.1642 | 0.428173333 | 0.29735 |
| NSFL1C   | 2.2766  | 2.1986  | 1.9418  | 0.175176711 | 0.2958  |
| SNX2     | -0.2649 | -0.1795 | -0.5177 | 0.175869383 | 0.2955  |
| ADAM15   | -5.1485 | -5.7236 | -5.7314 | 0.334308555 | 0.29535 |
| KIF20B   | 2.192   | 1.9181  | 1.7597  | 0.218706447 | 0.29535 |
| PRKD2    | 0.7573  | 1.0767  | 0.6223  | 0.233352637 | 0.2947  |
| ARHGEF12 | 1.0067  | 0.8086  | 0.613   | 0.196851323 | 0.29465 |
| SMAD3    | 0.249   | 0.3077  | -0.0161 | 0.172515767 | 0.29445 |
| MORN4    | 0.0517  | -0.7984 | -0.6671 | 0.457635798 | 0.29375 |
| CCL7     | -1.5314 | -1.3608 | -1.7397 | 0.189762334 | 0.2936  |
| DNAJB6   | 3.0058  | 3.1837  | 2.8014  | 0.191303014 | 0.29335 |
| RWDD1    | 4.4318  | 4.4775  | 4.1617  | 0.170671292 | 0.29295 |
| MB       | -5.4887 | -5.9634 | -6.0186 | 0.291313445 | 0.29255 |
| TAX1BP1  | 3.4858  | 3.4238  | 3.1623  | 0.17169668  | 0.2925  |
| FRMD7    | -0.7326 | -0.6246 | -0.9697 | 0.176528761 | 0.2911  |
| TXN      | 5.591   | 5.7885  | 5.3993  | 0.194607203 | 0.29045 |
| TNFSF11  | -1.3339 | -2.538  | -2.2258 | 0.624874822 | 0.28985 |
| CDC123   | -0.0368 | -0.7287 | -0.672  | 0.384148309 | 0.28925 |
| DCXR     | 0.2827  | 0.1882  | -0.0534 | 0.173332061 | 0.28885 |
| THBS2    | -4.4029 | -4.1635 | -4.5714 | 0.204974397 | 0.2882  |
| CADPS    | -0.3834 | -0.6319 | -0.7956 | 0.207548701 | 0.28795 |
| PLG      | -5.206  | -4.9878 | -5.3842 | 0.198536076 | 0.2873  |
| DKK1     | 1.0704  | 1.0395  | 0.7684  | 0.166159572 | 0.28655 |
| IL13RA1  | -3.8612 | -3.4137 | -3.9236 | 0.278133068 | 0.28615 |
| PRDX3    | 0.6931  | 0.788   | 0.4548  | 0.171665926 | 0.28575 |
| IFNG     | -2.3921 | -2.3014 | -2.6313 | 0.170429428 | 0.28455 |
| CCL2     | 3.6627  | 3.8636  | 3.4797  | 0.192019539 | 0.28345 |
| NEK7     | -0.5613 | -1.283  | -1.2049 | 0.396057963 | 0.28275 |
| PPP2R5A  | 2.2205  | 2.5504  | 2.1028  | 0.232031988 | 0.28265 |
| SLAMF1   | -1.5476 | -1.7722 | -1.9425 | 0.198071225 | 0.2826  |
| SOD2     | -1.4101 | -1.5899 | -1.7825 | 0.186236659 | 0.2825  |
| LAT      | 0.3494  | 0.6532  | 0.219   | 0.22279596  | 0.2823  |
| MYL1     | -0.3209 | -0.5724 | -0.7279 | 0.205378309 | 0.28125 |
| TLR2     | -0.4369 | -0.4099 | -0.7042 | 0.162681068 | 0.2808  |
| STAT2    | -0.8504 | -0.2281 | -0.82   | 0.350838771 | 0.28075 |
| CDC26    | 1.1377  | 1.0839  | 0.8301  | 0.164279558 | 0.2807  |
| TOMM20   | 5.0342  | 4.8925  | 4.6831  | 0.176634491 | 0.28025 |
| STX3     | 0.5698  | 0.3161  | 0.1627  | 0.205598987 | 0.28025 |
| MZT1     | 0.1663  | 0.3679  | -0.013  | 0.190558766 | 0.2801  |
| CAPS     | -1.9816 | -2.1544 | -2.3479 | 0.183247456 | 0.2799  |
| RASSF2   | -2.3134 | -2.0894 | -2.4812 | 0.196570632 | 0.2798  |
| CES3     | -4.9804 | -5.3332 | -5.4364 | 0.239114366 | 0.2796  |
| NFKB2    | -1.0265 | -1.3015 | -1.442  | 0.211347068 | 0.278   |
| RUVBL1   | 0.1927  | 0.3182  | -0.0225 | 0.17230679  | 0.27795 |
| CALCOCO1 | 0.8784  | 1.0055  | 0.6642  | 0.172492386 | 0.27775 |
| USP25    | 1.9022  | 1.9115  | 1.6294  | 0.16025331  | 0.27745 |
| KLRD1    | -8.802  | -8.7389 | -9.0476 | 0.163093358 | 0.27715 |

|         |          |          |          |             |         |
|---------|----------|----------|----------|-------------|---------|
| CAMLG   | -0.2688  | -0.368   | -0.5928  | 0.166007871 | 0.2744  |
| BAG4    | 0.8068   | 0.6452   | 0.453    | 0.177120411 | 0.273   |
| NECAP2  | -0.6387  | -1.393   | -1.2884  | 0.40866036  | 0.27255 |
| NINJ1   | -0.8308  | -0.3784  | -0.877   | 0.2755002   | 0.2724  |
| PRELP   | -10.4179 | -11.7007 | -11.3317 | 0.660399788 | 0.2724  |
| C1QTNF1 | -3.6999  | -4.0074  | -4.1259  | 0.21987667  | 0.27225 |
| INPPL1  | -0.5528  | -0.5843  | -0.8403  | 0.157683491 | 0.27175 |
| WWP2    | -0.7733  | -0.9832  | -1.1498  | 0.188664526 | 0.27155 |
| CHM     | 0.9296   | 0.5911   | 0.4902   | 0.230157707 | 0.27015 |
| CLGN    | -1.843   | -1.5974  | -1.9895  | 0.198126231 | 0.2693  |
| VEGFD   | -9.2961  | -9.1141  | -9.4739  | 0.179904086 | 0.2688  |
| CD101   | -2.3926  | -2.5792  | -2.7545  | 0.1809794   | 0.2686  |
| GFRA1   | -8.405   | -8.746   | -8.8439  | 0.230397707 | 0.2684  |
| SPART   | 5.6528   | 5.6555   | 5.3863   | 0.154649162 | 0.26785 |
| DXO     | 1.111    | 0.9956   | 0.7862   | 0.16465143  | 0.2671  |
| PBK     | 2.4562   | 2.3996   | 2.1613   | 0.156501576 | 0.2666  |
| SF3B4   | 2.1383   | 1.906    | 1.7561   | 0.192574721 | 0.26605 |
| FGF9    | -0.2013  | -0.5948  | -0.6625  | 0.249041824 | 0.26445 |
| UNG     | 0.9479   | 0.8994   | 0.6593   | 0.154537061 | 0.26435 |
| SEPTIN3 | -2.2061  | -2.1355  | -2.4349  | 0.156511001 | 0.2641  |
| PILRA   | 1.2196   | 1.4457   | 1.0687   | 0.189745891 | 0.26395 |
| GMFG    | 2.713    | 2.683    | 2.4345   | 0.152869498 | 0.2635  |
| GART    | 0.4758   | 0.2605   | 0.1051   | 0.186154837 | 0.26305 |
| CLPP    | 1.6322   | 1.3813   | 1.2439   | 0.19689526  | 0.26285 |
| SMS     | 0.4155   | 0.446    | 0.1687   | 0.152061271 | 0.26205 |
| NPTXR   | -4.5965  | -4.637   | -4.878   | 0.152186016 | 0.26125 |
| PKD2    | 2.0143   | 1.9634   | 1.7283   | 0.152566281 | 0.26055 |
| ERBIN   | 0.0244   | 0.1399   | -0.1783  | 0.161079059 | 0.26045 |
| ATXN10  | 1.6349   | 2.0001   | 1.5575   | 0.236381246 | 0.26    |
| RILPL2  | 2.0342   | 2.0812   | 1.7978   | 0.151882367 | 0.2599  |
| AXIN1   | -0.1398  | -0.2607  | -0.4599  | 0.161638207 | 0.25965 |
| WFDC1   | -2.7157  | -2.1052  | -2.6694  | 0.33989596  | 0.25895 |
| CD72    | -1.4478  | -1.4508  | -1.7076  | 0.149137118 | 0.2583  |
| LRFN2   | -0.3547  | -0.5167  | -0.694   | 0.169707484 | 0.2583  |
| SH2D1A  | -0.6948  | -1.0345  | -1.1226  | 0.225894717 | 0.25795 |
| SUGP1   | 0.7763   | 0.6091   | 0.4349   | 0.17071196  | 0.2578  |
| LACRT   | -0.4177  | -0.5212  | -0.7272  | 0.15755343  | 0.25775 |
| SEZ6L2  | -7.274   | -5.8979  | -6.843   | 0.703873357 | 0.25705 |
| IFT20   | 1.0558   | 0.7969   | 0.6696   | 0.196801482 | 0.25675 |
| COX5B   | 0.4277   | 0.1394   | 0.0269   | 0.206725978 | 0.25665 |
| PPIE    | 0.1276   | 0.1762   | -0.1046  | 0.150070783 | 0.2565  |
| POLR2A  | 0.0862   | 0.1929   | -0.1168  | 0.157325554 | 0.25635 |
| DTNB    | 0.7936   | 0.8691   | 0.5768   | 0.151735395 | 0.25455 |
| HDDC2   | 0.3389   | 0.5876   | 0.2091   | 0.192337369 | 0.25415 |
| SLC34A3 | -0.1255  | 0.3897   | -0.122   | 0.296445661 | 0.2541  |
| CLEC4D  | -6.0233  | -5.6054  | -6.0679  | 0.255126054 | 0.25355 |
| AKT1S1  | -0.2197  | -0.4736  | -0.5995  | 0.193461478 | 0.25285 |
| LTO1    | 0.5238   | 0.9323   | 0.4755   | 0.250955301 | 0.25255 |
| EBAG9   | 1.3096   | 1.1919   | 0.9982   | 0.15723811  | 0.25255 |
| USP8    | 0.4665   | 0.0163   | -0.0108  | 0.268088835 | 0.2522  |

|           |         |         |         |             |         |
|-----------|---------|---------|---------|-------------|---------|
| SLMAP     | -0.7227 | -0.8884 | -1.0575 | 0.167402877 | 0.25195 |
| SERPINA9  | -5.4938 | -5.1613 | -5.5779 | 0.220297004 | 0.25035 |
| TMPRSS5   | -6.5712 | -6.5803 | -6.8252 | 0.14409188  | 0.24945 |
| DDR1      | -4.1294 | -4.1422 | -4.3852 | 0.144133318 | 0.2494  |
| CCDC28A   | 0.6265  | 0.0829  | 0.1062  | 0.307342355 | 0.2485  |
| ATP5PO    | 0.5431  | -0.3329 | -0.143  | 0.460827375 | 0.2481  |
| CRADD     | -1.969  | -2.214  | -2.339  | 0.188215302 | 0.2475  |
| SEL1L     | 0.6637  | 0.5537  | 0.3636  | 0.151821178 | 0.2451  |
| BCL2L11   | -4.0152 | -2.3241 | -3.4122 | 0.857067658 | 0.24255 |
| PDCD1     | -5.2183 | -4.5634 | -5.1334 | 0.356137151 | 0.24255 |
| CLSTN2    | -8.2926 | -8.5776 | -8.6772 | 0.199608918 | 0.2421  |
| HPCAL1    | 0.7338  | 0.8056  | 0.5301  | 0.142915581 | 0.2396  |
| KIAA2013  | -0.2346 | 0.0232  | -0.3445 | 0.188742391 | 0.2388  |
| LPCAT2    | 2.0567  | 2.0047  | 1.7931  | 0.139620629 | 0.2376  |
| IVD       | 0.9087  | -0.1628 | 0.1367  | 0.552840619 | 0.23625 |
| STEAP4    | -0.2398 | -0.5897 | -0.6509 | 0.221802713 | 0.23615 |
| CEACAM16  | -7.447  | -6.8447 | -7.3816 | 0.330480473 | 0.23575 |
| HSP90B1   | -0.1857 | -0.3509 | -0.5033 | 0.158842983 | 0.235   |
| SNX9      | 5.1229  | 5.1634  | 4.9094  | 0.136466418 | 0.23375 |
| APRT      | -1.8988 | -2.302  | -2.3338 | 0.24248934  | 0.2334  |
| CGA       | -2.4853 | -2.4303 | -2.6911 | 0.13747441  | 0.2333  |
| INPP5D    | 0.5594  | 0.2869  | 0.19    | 0.191529902 | 0.23315 |
| MOCS2     | 3.3056  | 3.4772  | 3.1591  | 0.15921496  | 0.2323  |
| APBB1IP   | -4.1281 | -4.3558 | -4.4742 | 0.175902937 | 0.23225 |
| PPM1F     | 0.4625  | 0.1585  | 0.0787  | 0.202520155 | 0.2318  |
| DDI2      | 0.5354  | 0.2376  | 0.1551  | 0.200049652 | 0.2314  |
| ADAMTS4   | 0.2565  | -0.2487 | -0.2261 | 0.285377107 | 0.23    |
| ATOX1     | 2.8634  | 2.915   | 2.6596  | 0.135047004 | 0.2296  |
| BCAM      | 1.1156  | 1.2191  | 0.938   | 0.142168456 | 0.22935 |
| TLR4      | 1.0851  | 0.357   | 0.4917  | 0.387383802 | 0.22935 |
| HNRNPK    | 1.8089  | 1.7079  | 1.5296  | 0.14142158  | 0.2288  |
| CENPJ     | -0.4671 | 0.4224  | -0.2509 | 0.463911913 | 0.22855 |
| ZHX2      | 1.4668  | 1.259   | 1.1345  | 0.167881099 | 0.2284  |
| DNAJC9    | -0.3262 | -0.2122 | -0.4973 | 0.143499837 | 0.2281  |
| SOWAHA    | -0.2199 | -0.864  | -0.77   | 0.347924997 | 0.22805 |
| GAS2      | 3.2778  | 3.1317  | 2.9767  | 0.150571921 | 0.22805 |
| IMPG1     | 0.0214  | 0.1804  | -0.127  | 0.153730457 | 0.2279  |
| RSPO3     | -4.653  | -4.7163 | -4.9123 | 0.13519084  | 0.22765 |
| PHOSPHO1  | -1.5629 | -1.6344 | -1.8261 | 0.136097624 | 0.22745 |
| AP1G2     | -1.3137 | -0.999  | -1.3836 | 0.204873644 | 0.22725 |
| PDLIM7    | 4.6113  | 4.6735  | 4.4154  | 0.134697971 | 0.227   |
| GLYR1     | 0.2179  | 0.1516  | -0.0422 | 0.135158019 | 0.22695 |
| LGALS4    | -7.9599 | -6.9524 | -7.683  | 0.520497554 | 0.22685 |
| TNFAIP8L2 | -0.5293 | -0.6662 | -0.8245 | 0.147729223 | 0.22675 |
| GPKOW     | 1.1014  | 0.9977  | 0.8233  | 0.140539828 | 0.22625 |
| PLA2G15   | -3.6586 | -3.6966 | -3.9038 | 0.131971512 | 0.2262  |
| CA3       | -4.6564 | -5.0797 | -5.0942 | 0.248683862 | 0.22615 |
| SSB       | 2.7046  | 2.4174  | 2.3352  | 0.193948894 | 0.2258  |
| GSN       | -4.0817 | -4.1098 | -4.3213 | 0.13097711  | 0.22555 |
| BCL7B     | 0.2561  | -0.4635 | -0.3287 | 0.382532404 | 0.225   |

|           |         |         |         |             |         |
|-----------|---------|---------|---------|-------------|---------|
| FKBPL     | -0.2141 | -0.262  | -0.463  | 0.132064769 | 0.22495 |
| NEO1      | 0.1508  | 0.5268  | 0.1149  | 0.228154341 | 0.2239  |
| PTN       | -1.6765 | -2.7341 | -2.4287 | 0.544302575 | 0.2234  |
| GABARAPL1 | -0.4599 | -0.1702 | -0.5382 | 0.193856038 | 0.22315 |
| CLEC4G    | -6.3487 | -6.672  | -6.733  | 0.206531023 | 0.22265 |
| CACYBP    | 5.0008  | 5.112   | 4.834   | 0.139923598 | 0.2224  |
| PFKFB2    | -1.411  | -1.2721 | -1.5623 | 0.145144147 | 0.22075 |
| TMED4     | 0.2494  | -0.1585 | -0.1748 | 0.240344801 | 0.22025 |
| RAB6A     | -2.0776 | -2.0381 | -2.2765 | 0.12777325  | 0.21865 |
| BECN1     | 0.4475  | 0.2704  | 0.1405  | 0.154103547 | 0.21845 |
| PRSS2     | -5.377  | -5.5243 | -5.6682 | 0.145603308 | 0.21755 |
| NGRN      | 0.3712  | 0.4097  | 0.1734  | 0.126783792 | 0.21705 |
| NFATC3    | 0.7998  | 0.9695  | 0.6684  | 0.150955435 | 0.21625 |
| APP       | 1.3624  | 1.4887  | 1.2093  | 0.139914057 | 0.21625 |
| ACP1      | 0.9347  | 0.4258  | 0.4644  | 0.283328802 | 0.21585 |
| NCR3LG1   | -5.6104 | -4.8565 | -5.4492 | 0.396997888 | 0.21575 |
| FMNL1     | 0.3826  | -0.0541 | -0.051  | 0.251238751 | 0.21525 |
| MINK1     | 0.8247  | 0.6157  | 0.505   | 0.162349202 | 0.2152  |
| IL18      | -2.1077 | -2.1636 | -2.3503 | 0.127040978 | 0.21465 |
| TJAP1     | 4.8391  | 4.8418  | 4.626   | 0.123820125 | 0.21445 |
| REPS1     | 1.1252  | 1.0863  | 0.8918  | 0.125046005 | 0.21395 |
| UNC5D     | -0.7136 | -0.7578 | -0.9494 | 0.125343422 | 0.2137  |
| CPA1      | -7.1447 | -7.6973 | -7.6345 | 0.302548795 | 0.2135  |
| TMEM106A  | -1.2461 | -1.0971 | -1.3842 | 0.143584482 | 0.2126  |
| C1QA      | -5.8054 | -5.7846 | -6.0069 | 0.122781771 | 0.2119  |
| PRKAG3    | 0.3821  | 0.1133  | 0.0368  | 0.181354983 | 0.2109  |
| DNAJB14   | 1.6193  | 1.6983  | 1.4493  | 0.127241241 | 0.2095  |
| PRSS27    | -5.1673 | -5.5151 | -5.5505 | 0.21176254  | 0.2093  |
| GCNT1     | -3.3897 | -3.1299 | -3.4691 | 0.177415257 | 0.2093  |
| IGSF9     | -4.0993 | -4.3928 | -4.4549 | 0.189934208 | 0.20885 |
| CTSC      | -1.156  | -1.2991 | -1.4354 | 0.139713791 | 0.20785 |
| SEPTIN8   | 3.3952  | 3.3636  | 3.1724  | 0.1205514   | 0.207   |
| SAT1      | -0.3655 | -0.641  | -0.7094 | 0.182046706 | 0.20615 |
| PTPN6     | 2.0894  | 2.2584  | 1.9684  | 0.145660564 | 0.2055  |
| DCTN1     | 0.4004  | 0.6779  | 0.3346  | 0.182204455 | 0.20455 |
| NECTIN4   | -4.3791 | -3.7358 | -4.2619 | 0.342625145 | 0.20445 |
| TALDO1    | 4.5858  | 4.651   | 4.4144  | 0.122207856 | 0.204   |
| DTX3      | 0.1302  | 0.2774  | 0       | 0.138786791 | 0.2038  |
| HRAS      | 0.155   | 0.3035  | 0.0255  | 0.139108171 | 0.20375 |
| PSAP      | 4.1275  | 4.1977  | 3.9592  | 0.122566431 | 0.2034  |
| TEX33     | 0.2314  | -0.1543 | -0.1647 | 0.225746118 | 0.20325 |
| REEP4     | 1.4366  | 1.3514  | 1.1922  | 0.124053107 | 0.2018  |
| CCND2     | -0.9717 | -1.1833 | -1.2791 | 0.157293229 | 0.2016  |
| MAGED1    | -1.7097 | -1.7634 | -1.9378 | 0.119253693 | 0.20125 |
| DUSP13    | -3.6588 | -3.5317 | -3.7961 | 0.132232787 | 0.20085 |
| HSBP1     | 2.5     | 2.5543  | 2.3267  | 0.118871878 | 0.20045 |
| CIRBP     | 0.1068  | 0.4464  | 0.0762  | 0.205472042 | 0.2004  |
| SEPTIN7   | 2.86    | 2.8845  | 2.6725  | 0.115974494 | 0.19975 |
| MMP7      | -7.656  | -7.4021 | -7.7285 | 0.171395459 | 0.19945 |
| FGF5      | -2.7635 | -3.1702 | -3.1642 | 0.23309561  | 0.19735 |

|           |         |         |         |             |         |
|-----------|---------|---------|---------|-------------|---------|
| SCRN1     | -0.976  | -1.3516 | -1.3611 | 0.219646542 | 0.1973  |
| FMR1      | 2.3039  | 2.3835  | 2.1465  | 0.120609508 | 0.1972  |
| PDE1C     | 1.977   | 1.9456  | 1.7649  | 0.11447333  | 0.1964  |
| TGFB1     | -4.7031 | -5.0654 | -5.0798 | 0.213452391 | 0.19555 |
| CLSTN1    | -1.0557 | -0.9722 | -1.2094 | 0.120318868 | 0.19545 |
| CDKN2D    | -2.2407 | -1.9374 | -2.2843 | 0.188958311 | 0.19525 |
| ERC2      | -0.5547 | -0.0366 | -0.4907 | 0.282468411 | 0.19505 |
| TACC3     | 0.4147  | 0.2029  | 0.1147  | 0.154185213 | 0.1941  |
| BTN1A1    | -1.8078 | -1.6276 | -1.9109 | 0.1433879   | 0.1932  |
| TFRC      | -0.0216 | 0.2375  | -0.0848 | 0.17078463  | 0.19275 |
| MYH9      | 7.6468  | 7.6434  | 7.4554  | 0.109536539 | 0.1897  |
| CAMSAP1   | 2.0684  | 1.9017  | 1.7958  | 0.13742541  | 0.18925 |
| STC2      | 0.8952  | 0.9051  | 0.7113  | 0.109144904 | 0.18885 |
| CDC42BPB  | -0.0693 | 0.2291  | -0.1087 | 0.184708672 | 0.1886  |
| PPT1      | -1.3931 | -1.4451 | -1.6072 | 0.111668572 | 0.1881  |
| DDHD2     | -0.8029 | -0.6548 | -0.9169 | 0.131419189 | 0.18805 |
| SEPTIN9   | 1.5331  | 1.4597  | 1.3084  | 0.114578459 | 0.188   |
| CCL21     | -4.7843 | -5.086  | -5.1231 | 0.185824622 | 0.18795 |
| DHPS      | 2.1218  | 2.4338  | 2.0899  | 0.19001264  | 0.1879  |
| IL6R      | -5.4345 | -5.1243 | -5.4672 | 0.189241354 | 0.1878  |
| IKZF2     | 0.0819  | 0.3853  | 0.0464  | 0.186263711 | 0.1872  |
| GENE      | 2.2689  | 2.5392  | 2.2169  | 0.173033417 | 0.18715 |
| TMPPRS11D | -3.5191 | -2.8222 | -3.3575 | 0.364767108 | 0.18685 |
| CCL28     | -2.4035 | -3.0012 | -2.8883 | 0.317548616 | 0.18595 |
| KLK8      | -6.4288 | -5.7579 | -6.2789 | 0.352140554 | 0.18555 |
| CX3CL1    | -6.0391 | -6.14   | -6.2745 | 0.118098984 | 0.18495 |
| HSPA1A    | 3.5411  | 3.6673  | 3.4196  | 0.123857431 | 0.1846  |
| BRK1      | 0.5683  | 0.4964  | 0.348   | 0.112341933 | 0.18435 |
| CETN3     | 3.1779  | 3.2535  | 3.0317  | 0.112757143 | 0.184   |
| PSRC1     | -0.6887 | 0.1177  | -0.4681 | 0.416754716 | 0.1826  |
| GPR158    | -0.7423 | -0.6461 | -0.876  | 0.115458607 | 0.1818  |
| FUOM      | -4.8808 | -5.1404 | -5.1923 | 0.166892191 | 0.1817  |
| PEAR1     | -3.1563 | -3.2054 | -3.362  | 0.107429713 | 0.18115 |
| GJA8      | -1.8705 | -1.4258 | -1.8292 | 0.245694709 | 0.18105 |
| TIMP1     | 5.1024  | 5.2586  | 5.0001  | 0.130183191 | 0.1804  |
| EFNA4     | -0.4174 | -0.5253 | -0.6516 | 0.117220405 | 0.18025 |
| MSR1      | -6.3189 | -6.5571 | -6.6182 | 0.158141782 | 0.1802  |
| PTRHD1    | 1.9472  | 2.0883  | 1.8386  | 0.12520201  | 0.17915 |
| DOK1      | -1.977  | -2.8043 | -2.5685 | 0.426204016 | 0.17785 |
| RAB6B     | -2.6756 | -2.6237 | -2.8273 | 0.105798125 | 0.17765 |
| C2CD2L    | 0.6341  | 0.4944  | 0.3875  | 0.123663023 | 0.17675 |
| MZB1      | -7.3632 | -7.3573 | -7.5359 | 0.101454473 | 0.17565 |
| ADH1B     | -3.5887 | -2.8031 | -3.3712 | 0.405629392 | 0.1753  |
| YY1       | 0.6904  | 0.3482  | 0.3441  | 0.198763402 | 0.1752  |
| BMP4      | -6.9086 | -6.2877 | -6.7732 | 0.326486401 | 0.17505 |
| TNFSF13   | -6.061  | -6.1883 | -6.299  | 0.119096446 | 0.17435 |
| SPINT1    | 2.2076  | 2.286   | 2.0726  | 0.107943751 | 0.1742  |
| SNAP25    | 1.5643  | 1.6914  | 1.4539  | 0.118847816 | 0.17395 |
| TNFSF8    | -2.915  | -2.1676 | -2.7141 | 0.386788017 | 0.1728  |
| TGFA      | -1.6824 | -1.6969 | -1.8623 | 0.099942834 | 0.17265 |



|            |         |         |         |             |         |
|------------|---------|---------|---------|-------------|---------|
| EIF4E      | 0.4943  | 0.4528  | 0.3009  | 0.101816354 | 0.17265 |
| KCTD5      | 4.1088  | 3.9946  | 3.8794  | 0.114700363 | 0.1723  |
| CCN3       | -4.6957 | -4.396  | -4.718  | 0.179815359 | 0.17215 |
| CD6        | -6.1769 | -7.3908 | -6.9554 | 0.614978132 | 0.17155 |
| NCR1       | -3.2183 | -2.9573 | -3.2588 | 0.163637557 | 0.171   |
| TARS1      | 0.7517  | 0.6847  | 0.5483  | 0.10365449  | 0.1699  |
| SLIRP      | 0.4891  | 0.2862  | 0.2178  | 0.141097283 | 0.16985 |
| FGR        | -0.6496 | -0.8771 | -0.933  | 0.150109194 | 0.16965 |
| FUT1       | -0.9398 | -1.7156 | -1.4969 | 0.400011612 | 0.1692  |
| PDGFRB     | -4.2487 | -4.2186 | -4.4014 | 0.098012873 | 0.16775 |
| C7orf50    | 0.5104  | 0.3786  | 0.2776  | 0.116739082 | 0.1669  |
| ENDOU      | -3.1931 | -3.6033 | -3.565  | 0.226583517 | 0.1668  |
| THSD1      | -1.7748 | -0.5682 | -1.338  | 0.610910501 | 0.1665  |
| PPM1A      | 0.2575  | 0.3179  | 0.1231  | 0.099715061 | 0.1646  |
| CMC1       | 1.5877  | 1.4087  | 1.3338  | 0.130458308 | 0.1644  |
| ALPI       | -3.6233 | -3.4617 | -3.7067 | 0.124562648 | 0.1642  |
| DNAJA4     | -0.1932 | 0.0137  | -0.2532 | 0.140025724 | 0.16345 |
| SCGN       | -1.4214 | -2.3998 | -2.0732 | 0.498126048 | 0.1626  |
| LPO        | -6.5361 | -6.855  | -6.8579 | 0.184959842 | 0.16235 |
| MEGF9      | -4.7567 | -4.4964 | -4.7887 | 0.160322269 | 0.16215 |
| CDC37      | 2.5321  | 2.4853  | 2.347   | 0.096245467 | 0.1617  |
| GLO1       | 6.0244  | 6.0033  | 5.853   | 0.093464129 | 0.16085 |
| HIP1       | -0.1021 | -0.0551 | -0.2389 | 0.095486194 | 0.1603  |
| RNASE1     | -1.5666 | -1.3001 | -1.5935 | 0.162187864 | 0.16015 |
| MYL4       | 0.7758  | 0.7133  | 0.5849  | 0.0973273   | 0.15965 |
| KLK12      | -4.1138 | -2.6792 | -3.556  | 0.723186956 | 0.1595  |
| LRP2BP     | -2.4925 | -2.7985 | -2.8049 | 0.178545382 | 0.1594  |
| ARG2       | 0.7518  | 0.6034  | 0.5192  | 0.117767398 | 0.1584  |
| AFAP1      | 0.4291  | 0.7117  | 0.4123  | 0.168218786 | 0.1581  |
| VASH1      | 0.3441  | 0.2456  | 0.1371  | 0.10354025  | 0.15775 |
| RGS10      | 0.2707  | -0.1112 | -0.0779 | 0.211533473 | 0.15765 |
| GIGYF2     | 3.2162  | 3.3371  | 3.119   | 0.109264404 | 0.15765 |
| PSME1      | 1.3944  | 1.3636  | 1.2214  | 0.092284415 | 0.1576  |
| ARTN       | -0.2188 | -0.181  | -0.3571 | 0.092706472 | 0.1572  |
| PTTG1      | -0.5908 | -0.3516 | -0.6282 | 0.150068296 | 0.157   |
| DLG4       | 0.8921  | 0.8734  | 0.7258  | 0.091096231 | 0.15695 |
| LAIR1      | 2.4015  | 2.5934  | 2.3406  | 0.131935755 | 0.15685 |
| SFRP4      | -5.8096 | -5.6136 | -5.8669 | 0.132828323 | 0.1553  |
| OGT        | 0.0697  | -1.021  | -0.6303 | 0.552610921 | 0.15465 |
| TMEM25     | -3.6616 | -3.9945 | -3.9826 | 0.188858421 | 0.15455 |
| CD207      | -4.079  | -3.2869 | -3.8371 | 0.405926525 | 0.15415 |
| ADAMTS1    | -0.3746 | -1.1166 | -0.8996 | 0.381505352 | 0.154   |
| C1QTNF9    | -6.1009 | -6.1229 | -6.2659 | 0.089589806 | 0.154   |
| PDAP1      | 4.2302  | 4.1645  | 4.0434  | 0.094759292 | 0.15395 |
| OD1-OID310 | -2.2452 | -2.3369 | -2.4445 | 0.099755651 | 0.15345 |
| DNER       | -3.2782 | -3.1441 | -3.3645 | 0.111060539 | 0.15335 |
| PLA2G7     | -6.424  | -6.5091 | -6.6192 | 0.097866457 | 0.15265 |
| BDNF       | -2.2264 | -1.2484 | -1.8887 | 0.496740942 | 0.1513  |
| EVI5       | 2.4032  | 2.5984  | 2.3496  | 0.130943652 | 0.1512  |
| KITLG      | -3.8799 | -4.788  | -4.4848 | 0.46232742  | 0.15085 |

|           |         |         |         |             |         |
|-----------|---------|---------|---------|-------------|---------|
| SSC4D     | -1.1353 | -1.2211 | -1.3289 | 0.09700811  | 0.1507  |
| CNTNAP4   | -0.105  | -0.1454 | -0.2759 | 0.089320789 | 0.1507  |
| CXCL17    | -5.0523 | -5.2289 | -5.2912 | 0.123923404 | 0.1506  |
| TP53      | 2.8042  | 2.7787  | 2.6411  | 0.087735987 | 0.15035 |
| PDIA3     | 0.9102  | 0.8425  | 0.7263  | 0.093009802 | 0.15005 |
| TFF1      | -2.8625 | -3.0189 | -3.0904 | 0.116555866 | 0.1497  |
| PON2      | -1.1581 | -1.1672 | -1.3122 | 0.086462535 | 0.14955 |
| INHBB     | -2.1136 | -1.8655 | -2.1384 | 0.15091005  | 0.14885 |
| PSG1      | -3.328  | -3.3931 | -3.509  | 0.091680441 | 0.14845 |
| ZNF174    | 0.169   | -0.0259 | -0.0763 | 0.129549386 | 0.14785 |
| SPRING1   | -0.6566 | -0.855  | -0.9035 | 0.130814385 | 0.1477  |
| SMAD2     | -0.1596 | -0.0958 | -0.2735 | 0.090019387 | 0.1458  |
| FGF3      | 0.2431  | 0.2485  | 0.1004  | 0.083990138 | 0.1454  |
| TLR1      | -0.7468 | -1.1517 | -1.0944 | 0.219109204 | 0.14515 |
| FCRL3     | -0.0186 | -0.5398 | -0.4237 | 0.273628294 | 0.1445  |
| CEP170    | 1.3764  | 1.3752  | 1.2328  | 0.082563269 | 0.143   |
| ARSB      | -3.1451 | -3.2637 | -3.3473 | 0.101603609 | 0.1429  |
| NRCAM     | 1.3324  | 1.3733  | 1.2101  | 0.084915978 | 0.14275 |
| CTSD      | 2.8743  | 3.0744  | 2.8316  | 0.129624548 | 0.14275 |
| ELAC1     | 3.2336  | 3.4785  | 3.2143  | 0.14728099  | 0.14175 |
| GALNT3    | -2.6421 | -4.1512 | -3.5371 | 0.758894659 | 0.14045 |
| AARSD1    | 2.5095  | 2.5221  | 2.3762  | 0.080843944 | 0.1396  |
| CD244     | -2.0596 | -1.9247 | -2.1312 | 0.104854518 | 0.13905 |
| DYNC1H1   | 0.3503  | 0.2578  | 0.1652  | 0.092550005 | 0.13885 |
| NENF      | 0.1035  | 0.2714  | 0.049   | 0.115918376 | 0.13845 |
| MAP1LC3B2 | -0.0988 | -0.1185 | -0.2469 | 0.080424146 | 0.13825 |
| ITGB7     | -3.5201 | -3.5065 | -3.6514 | 0.080021518 | 0.1381  |
| DAPP1     | -2.4651 | -2.9561 | -2.8484 | 0.258069493 | 0.1378  |
| PAGR1     | 2.2185  | 2.2877  | 2.1157  | 0.086545248 | 0.1374  |
| PHACTR2   | 0.5562  | 0.2466  | 0.2643  | 0.173863481 | 0.1371  |
| MORF4L2   | 1.3551  | 1.2328  | 1.1574  | 0.099772859 | 0.13655 |
| LY6D      | -5.1013 | -4.8403 | -5.1061 | 0.152092998 | 0.1353  |
| PAG1      | 3.8829  | 4.213   | 3.9131  | 0.182491123 | 0.13485 |
| CD164L2   | 0.724   | 0.3885  | 0.4223  | 0.184718516 | 0.13395 |
| C8B       | -2.4747 | -2.7303 | -2.7356 | 0.149124255 | 0.1331  |
| STC1      | -3.919  | -4.4698 | -4.3271 | 0.285858222 | 0.1327  |
| ARHGEF1   | -0.8386 | -0.8382 | -0.9703 | 0.076152763 | 0.1319  |
| DSCAM     | -1.1976 | -0.9902 | -1.2255 | 0.128555604 | 0.1316  |
| B2M       | 6.6081  | 6.7819  | 6.5636  | 0.115355667 | 0.1314  |
| GASK1A    | -2.2754 | -2.0395 | -2.2877 | 0.139882891 | 0.13025 |
| CTHRC1    | 3.6006  | 3.5746  | 3.4587  | 0.075547358 | 0.1289  |
| REG1A     | -7.2412 | -7.2571 | -7.378  | 0.074815172 | 0.12885 |
| MAP4K5    | -0.6319 | -0.9454 | -0.9175 | 0.173506974 | 0.12885 |
| TTN       | -0.7005 | -0.73   | -0.8437 | 0.075613248 | 0.12845 |
| KLK1      | -8.3241 | -7.8783 | -8.2294 | 0.234867672 | 0.1282  |
| BMP10     | -4.2005 | -3.8113 | -4.134  | 0.208180282 | 0.1281  |
| DGKA      | 0.529   | 0.7733  | 0.5237  | 0.142601274 | 0.12745 |
| HGS       | 0.3212  | 0.5822  | 0.3243  | 0.149801546 | 0.1274  |
| LEO1      | 1.815   | 1.5434  | 1.5518  | 0.154440582 | 0.1274  |
| AMY2B     | -6.1134 | -6.3486 | -6.3584 | 0.138708375 | 0.1274  |

|            |         |         |         |             |         |
|------------|---------|---------|---------|-------------|---------|
| ACRBP      | -0.4317 | -0.8559 | -0.7708 | 0.224416451 | 0.127   |
| TSC1       | 0.7207  | -1.0019 | -0.2674 | 0.864405636 | 0.1268  |
| TCL1A      | -5.9236 | -5.7261 | -5.9513 | 0.122806474 | 0.12645 |
| IL33       | 0.5297  | 0.0225  | 0.1501  | 0.263827519 | 0.126   |
| PPP3R1     | 1.7735  | 1.6763  | 1.5991  | 0.087390922 | 0.1258  |
| RAB44      | -0.6146 | -0.6297 | -0.7472 | 0.072591345 | 0.12505 |
| DKKL1      | -3.4046 | -3.2436 | -3.4488 | 0.10799821  | 0.1247  |
| RABEP1     | 4.0698  | 4.2744  | 4.0476  | 0.125028157 | 0.1245  |
| CHRD12     | -2.6224 | -2.6858 | -2.7783 | 0.078401339 | 0.1242  |
| SPOCK1     | -3.4099 | -3.4051 | -3.5316 | 0.071689353 | 0.1241  |
| NT5C1A     | 2.3399  | 2.3641  | 2.2286  | 0.072265229 | 0.1234  |
| NFU1       | 1.7545  | 1.7148  | 1.612   | 0.073541576 | 0.12265 |
| GYS1       | -0.1066 | -0.0035 | -0.1773 | 0.087401888 | 0.12225 |
| EDF1       | 0.3165  | 0.5064  | 0.2893  | 0.118275286 | 0.12215 |
| ACP5       | -2.1818 | -2.3031 | -2.3637 | 0.092622585 | 0.12125 |
| UBE2B      | 1.0606  | 1.053   | 0.9358  | 0.069962657 | 0.121   |
| CUZD1      | 0.3978  | -0.1679 | -0.0056 | 0.291287184 | 0.12055 |
| CASP2      | -1.4858 | -1.769  | -1.7471 | 0.157564558 | 0.1197  |
| TXNDC15    | -4.608  | -3.8862 | -4.3668 | 0.367457263 | 0.1197  |
| IFNGR2     | -3.0144 | -3.0727 | -3.1632 | 0.074978419 | 0.11965 |
| TOM1L2     | -0.04   | -1.051  | -0.6647 | 0.510163173 | 0.1192  |
| ATXN2L     | 0.9321  | 0.8674  | 0.7808  | 0.075913701 | 0.11895 |
| NOS3       | 1.0947  | 1.0068  | 0.9318  | 0.081535084 | 0.11895 |
| NCF2       | -6.0232 | -6.0389 | -6.1499 | 0.069065645 | 0.11885 |
| AMOT       | -0.3828 | -0.4364 | -0.5284 | 0.07363912  | 0.1188  |
| UBXN1      | 3.7411  | 4.0869  | 3.7958  | 0.185880311 | 0.1182  |
| MORC3      | 0.7572  | 0.8499  | 0.6855  | 0.082423237 | 0.11805 |
| NMT1       | 0.4117  | 0.2423  | 0.2094  | 0.10855418  | 0.1176  |
| GIT1       | 0.962   | 0.8701  | 0.7985  | 0.081959767 | 0.11755 |
| APOD       | -2.9502 | -3.1577 | -3.1711 | 0.123849788 | 0.11715 |
| YWHAQ      | 3.7628  | 3.7827  | 3.6558  | 0.068250299 | 0.11695 |
| GNAS       | -1.7884 | -1.7264 | -1.8743 | 0.074271147 | 0.1169  |
| FOXO1      | -0.5111 | -0.2924 | -0.5183 | 0.128395444 | 0.11655 |
| NFYA       | 0.2778  | 0.0471  | 0.0461  | 0.133484319 | 0.11635 |
| IL20RB     | 0.2119  | 0.912   | 0.4458  | 0.356415408 | 0.11615 |
| TEF        | -1.1858 | -2.0134 | -1.7157 | 0.419193881 | 0.1161  |
| RAP1A      | -0.1609 | -0.3665 | -0.3797 | 0.122691374 | 0.116   |
| TFF3       | -3.31   | -3.0081 | -3.2742 | 0.164941636 | 0.11515 |
| INPP1      | -0.6959 | -0.6544 | -0.7899 | 0.069424419 | 0.11475 |
| HSDL2      | -2.3983 | -2.4816 | -2.5544 | 0.078108834 | 0.11445 |
| DCC        | -0.238  | -0.3034 | -0.3841 | 0.0731834   | 0.1134  |
| CNTN3      | -5.1137 | -4.9664 | -5.1534 | 0.09852443  | 0.11335 |
| IDS        | -0.1078 | -0.0811 | -0.2075 | 0.066620743 | 0.11305 |
| IZUMO1     | 1.1589  | 1.1351  | 1.0341  | 0.066260194 | 0.1129  |
| NCAN       | -8.5064 | -7.9809 | -8.3563 | 0.270679829 | 0.11265 |
| EDN1       | -2.2205 | -3.0846 | -2.7647 | 0.436874974 | 0.11215 |
| HNF1A      | 0.3122  | -0.9961 | -0.4537 | 0.657324053 | 0.11175 |
| PCYT2      | -0.9716 | -0.9757 | -1.0851 | 0.064378335 | 0.11145 |
| OD1-OID314 | -1.954  | -2.053  | -2.1135 | 0.080520701 | 0.11    |
| CCL27      | -7.1889 | -7.9362 | -7.6711 | 0.378869401 | 0.10855 |

|            |         |         |         |             |         |
|------------|---------|---------|---------|-------------|---------|
| BAG3       | -0.1545 | -0.3232 | -0.3468 | 0.104877659 | 0.10795 |
| TBR1       | 0.0765  | -0.2939 | -0.2163 | 0.195341479 | 0.1076  |
| TSPYL1     | 0.0353  | 0.096   | -0.0418 | 0.06906246  | 0.10745 |
| KAZN       | -1.5207 | -1.1084 | -1.4218 | 0.215248717 | 0.10725 |
| AHSA1      | 0.0358  | -0.1643 | -0.1713 | 0.117600609 | 0.10705 |
| RPA2       | 0.5021  | 0.7176  | 0.5036  | 0.123988239 | 0.10625 |
| OLA2_BOLA2 | -0.7978 | -0.6952 | -0.8519 | 0.079591101 | 0.1054  |
| PCBP2      | 0.2227  | 0.2377  | 0.1249  | 0.061255857 | 0.1053  |
| CEP43      | 4.6946  | 4.6038  | 4.5442  | 0.075737441 | 0.105   |
| MAEA       | 1.3972  | 1.3534  | 1.2704  | 0.064401967 | 0.1049  |
| SNCA       | -2.4229 | -2.0629 | -2.3467 | 0.189714206 | 0.1038  |
| OMD        | -6.7993 | -6.8229 | -6.9145 | 0.060853047 | 0.1034  |
| RBFOX3     | 2.8153  | 2.8125  | 2.7105  | 0.059714432 | 0.1034  |
| GGH        | 1.1398  | 1.2222  | 1.0777  | 0.072487263 | 0.1033  |
| IGFBP2     | 3.1883  | 3.1642  | 3.0734  | 0.060590786 | 0.10285 |
| HLA-A      | -0.7378 | -0.8276 | -0.8853 | 0.074329873 | 0.1026  |
| VTI1A      | 4.4685  | 4.8277  | 4.5459  | 0.189044369 | 0.1022  |
| LAMA1      | -0.4936 | -0.8651 | -0.7812 | 0.194835495 | 0.10185 |
| RAB2B      | -0.237  | 0.3432  | -0.0484 | 0.295959614 | 0.1015  |
| CFB        | -3.1667 | -3.0396 | -3.2046 | 0.086425131 | 0.10145 |
| NRXN3      | 0.1505  | 0.1722  | 0.06    | 0.059511876 | 0.10135 |
| SERPINH1   | 4.3058  | 4.6055  | 4.3548  | 0.160764621 | 0.10085 |
| IMPACT     | -0.8498 | -0.898  | -0.9745 | 0.062882934 | 0.1006  |
| TADA3      | 1.0165  | 0.927   | 0.8714  | 0.073207035 | 0.10035 |
| PPP1CC     | -0.2432 | 0.3776  | -0.0318 | 0.315618694 | 0.099   |
| ST13       | 0.6954  | 0.8815  | 0.6895  | 0.109187927 | 0.09895 |
| FLI1       | -0.7676 | -0.2719 | -0.6178 | 0.254232617 | 0.09805 |
| KIF1C      | 0.9208  | 0.9197  | 0.8222  | 0.056611866 | 0.09805 |
| GRP        | -6.6126 | -7.022  | -6.9148 | 0.21229894  | 0.0975  |
| SATB1      | 1.2893  | 1.2633  | 1.1791  | 0.057604514 | 0.0972  |
| KIR2DL2    | -5.3156 | -3.9444 | -4.7272 | 0.687892899 | 0.0972  |
| BRAP       | 0.9291  | 1.1681  | 0.9518  | 0.131922945 | 0.0968  |
| HS1BP3     | -1.9329 | -2.2307 | -2.1782 | 0.15896183  | 0.0964  |
| MFAP3L     | -1.1154 | -0.464  | -0.8858 | 0.33039203  | 0.0961  |
| FSTL1      | -2.7813 | -2.6911 | -2.8319 | 0.071322086 | 0.0957  |
| CST1       | -3.1358 | -2.7161 | -3.0215 | 0.21697993  | 0.09555 |
| ATP6V1D    | 0.5559  | 0.5089  | 0.4374  | 0.059670624 | 0.095   |
| PI3        | -5.4139 | -4.9621 | -5.2827 | 0.232422403 | 0.0947  |
| EDEM2      | 0.2442  | -0.2646 | -0.1041 | 0.260112341 | 0.0939  |
| EHBP1      | 4.167   | 4.0707  | 4.0258  | 0.072142382 | 0.09305 |
| GDF2       | -2.512  | -2.178  | -2.4365 | 0.175156359 | 0.0915  |
| FGF19      | -5.9203 | -5.5559 | -5.8296 | 0.189703954 | 0.0915  |
| AP3S2      | 0.4606  | 0.3414  | 0.31    | 0.079451201 | 0.091   |
| KIAA0319   | -2.6412 | -2.5083 | -2.6656 | 0.084657211 | 0.09085 |
| TG         | 3.8457  | 3.9549  | 3.8112  | 0.075016198 | 0.0891  |
| IL17F      | -0.6159 | -0.9513 | -0.8715 | 0.175210616 | 0.0879  |
| SPINK6     | -0.046  | 0.0783  | -0.071  | 0.079964555 | 0.08715 |
| HSD11B1    | -2.7278 | -2.7754 | -2.8383 | 0.055426257 | 0.0867  |
| CD99       | 2.3405  | 2.3881  | 2.278   | 0.055217781 | 0.0863  |
| HSD17B3    | 0.7965  | 0.6276  | 0.6258  | 0.098038207 | 0.08625 |

|          |         |         |         |             |         |
|----------|---------|---------|---------|-------------|---------|
| INSL3    | -3.5345 | -3.518  | -3.6123 | 0.050361328 | 0.08605 |
| BLOC1S3  | -0.0696 | -0.0456 | -0.1435 | 0.051025516 | 0.0859  |
| PI16     | -2.3743 | -2.1044 | -2.3245 | 0.143625706 | 0.08515 |
| NPC2     | 3.4839  | 3.4198  | 3.368   | 0.058058677 | 0.08385 |
| TCP11    | -1.365  | -1.4718 | -1.5021 | 0.072019372 | 0.0837  |
| ITPA     | 2.1619  | 1.7572  | 1.8762  | 0.207993421 | 0.08335 |
| ADGRB3   | -4.053  | -4.0975 | -4.1584 | 0.052912223 | 0.08315 |
| OFD1     | 0.2412  | -0.5899 | -0.2574 | 0.418307188 | 0.08305 |
| SERPINA5 | -3.9946 | -3.5384 | -3.8494 | 0.233067401 | 0.0829  |
| VASN     | -3.5857 | -3.7641 | -3.7577 | 0.101202372 | 0.0828  |
| PDE4D    | -0.796  | -1.0256 | -0.9932 | 0.124267024 | 0.0824  |
| MMUT     | 0.4143  | 0.9951  | 0.6225  | 0.294252341 | 0.0822  |
| LPA      | -6.6795 | -6.5431 | -6.6934 | 0.08305446  | 0.0821  |
| UGDH     | 0.0595  | -1.079  | -0.5917 | 0.571212888 | 0.08195 |
| PLXDC2   | -3.2289 | -2.5761 | -2.9837 | 0.329749562 | 0.0812  |
| SNX5     | 0.7162  | 0.3894  | 0.4717  | 0.169976361 | 0.0811  |
| HLA-DRA  | -2.2868 | -2.371  | -2.4097 | 0.062838072 | 0.0808  |
| EDDM3B   | -1.52   | -1.672  | -1.6767 | 0.089144994 | 0.0807  |
| ITGBL1   | 1.3132  | 1.2948  | 1.2233  | 0.047491789 | 0.0807  |
| TPSAB1   | 0.5244  | 0.6011  | 0.4822  | 0.060278437 | 0.08055 |
| CALB1    | 1.0221  | 1.1435  | 1.0024  | 0.076414724 | 0.0804  |
| IL18R1   | -6.4913 | -7.1392 | -6.8953 | 0.327230199 | 0.08005 |
| FGFR2    | -1.3355 | -1.3682 | -1.4312 | 0.048642882 | 0.07935 |
| RECK     | -5.1016 | -5.2817 | -5.2707 | 0.100955287 | 0.07905 |
| CCL13    | -8.1956 | -9.1056 | -8.7293 | 0.457263123 | 0.0787  |
| GAGE2A   | 0.5229  | 0.6275  | 0.4968  | 0.069167502 | 0.0784  |
| MNDA     | -3.1866 | -3.5255 | -3.4342 | 0.175354241 | 0.07815 |
| MTHFSD   | -0.4102 | 0.0146  | -0.2745 | 0.216967102 | 0.0767  |
| CC2D1A   | 1.2013  | 0.8637  | 0.9558  | 0.1745119   | 0.0767  |
| TGFBR1   | 1.6026  | 1.4911  | 1.4708  | 0.070964287 | 0.07605 |
| CHCHD6   | 0.2839  | 0.4064  | 0.2695  | 0.075227677 | 0.07565 |
| LDLRAP1  | -0.5431 | 0.1087  | -0.2924 | 0.328779293 | 0.0752  |
| TRIAP1   | 3.2175  | 3.3152  | 3.1918  | 0.065106758 | 0.07455 |
| CLEC2L   | 0.4735  | 0.2901  | 0.3088  | 0.100921867 | 0.073   |
| GTF2IRD1 | -1.007  | -0.7393 | -0.9455 | 0.140216487 | 0.07235 |
| DNAJC21  | 0.2997  | 0.2005  | 0.1779  | 0.064790226 | 0.0722  |
| PRDX6    | -1.5306 | -1.6088 | -1.6412 | 0.056858538 | 0.0715  |
| VSIG4    | -4.0475 | -4.0776 | -4.1337 | 0.043748638 | 0.07115 |
| TBC1D17  | 0.8887  | 0.5207  | 0.6336  | 0.188523394 | 0.0711  |
| SCPEP1   | -2.4734 | -3.2196 | -2.9154 | 0.375214623 | 0.0689  |
| SELENOP  | 3.8709  | 3.8415  | 3.7874  | 0.042354496 | 0.0688  |
| ADGRV1   | -0.859  | -0.0639 | -0.5302 | 0.399526624 | 0.06875 |
| XCL1     | -4.3654 | -4.0242 | -4.2634 | 0.175137127 | 0.0686  |
| TIA1     | 1.0267  | 0.9141  | 0.902   | 0.068769252 | 0.0684  |
| SKAP1    | -2.4466 | -2.5929 | -2.5881 | 0.083115362 | 0.06835 |
| CD5L     | -3.5193 | -3.4175 | -3.5363 | 0.064246504 | 0.0679  |
| SUSD1    | -3.0956 | -4.182  | -3.7067 | 0.544612746 | 0.0679  |
| BAP18    | -1.5539 | -1.8122 | -1.7507 | 0.134926758 | 0.06765 |
| CNTNAP2  | -3.303  | -2.9738 | -3.2058 | 0.169137262 | 0.0674  |
| ENPP2    | -3.3222 | -3.4317 | -3.4442 | 0.067119918 | 0.06725 |

|          |         |         |         |             |         |
|----------|---------|---------|---------|-------------|---------|
| NFATC1   | -1.2489 | -1.0814 | -1.2321 | 0.092239706 | 0.06695 |
| BCR      | -0.9286 | -1.0786 | -1.0699 | 0.084203503 | 0.0663  |
| OMP      | 1.2207  | 1.4152  | 1.2519  | 0.104459386 | 0.06605 |
| PSMD5    | -0.6071 | -1.029  | -0.8839 | 0.214348571 | 0.06585 |
| STAB2    | -2.6872 | -2.7416 | -2.78   | 0.046629318 | 0.0656  |
| LILRB4   | -1.2206 | -1.8193 | -1.5854 | 0.301725576 | 0.06545 |
| MUC13    | -1.6619 | -2.3086 | -2.0503 | 0.325523768 | 0.06505 |
| TGFB2    | 1.5201  | 0.9738  | 1.182   | 0.275711969 | 0.06495 |
| SELPLG   | -2.505  | -2.6517 | -2.643  | 0.082300851 | 0.06465 |
| ADAM22   | -7.1089 | -7.1639 | -7.2009 | 0.046292548 | 0.0645  |
| PSMD1    | 2.1816  | 2.3903  | 2.2217  | 0.110747205 | 0.06425 |
| FGF16    | -2.5282 | -2.3072 | -2.4816 | 0.116496009 | 0.0639  |
| IL3      | 4.7684  | 4.7648  | 4.7029  | 0.036821235 | 0.0637  |
| MRPL58   | 0.1223  | -0.0138 | -0.0091 | 0.077256348 | 0.06335 |
| PLCB2    | -0.5492 | -0.4075 | -0.5417 | 0.079733703 | 0.06335 |
| IMPA1    | -0.1428 | -0.27   | -0.2696 | 0.073323757 | 0.0632  |
| FCRL1    | -7.0661 | -6.8906 | -7.0415 | 0.095022997 | 0.06315 |
| PRC1     | 0.1825  | -0.0091 | 0.024   | 0.102411279 | 0.0627  |
| ENO3     | -1.341  | -1.7145 | -1.5904 | 0.19022067  | 0.06265 |
| ALMS1    | -0.1396 | -0.1606 | -0.2122 | 0.037359336 | 0.0621  |
| MMP9     | -2.4365 | -2.7707 | -2.6656 | 0.170891028 | 0.062   |
| NGFR     | 3.111   | 3.0906  | 3.0388  | 0.037220604 | 0.062   |
| HJV      | -2.8618 | -3.2867 | -3.1351 | 0.215335188 | 0.06085 |
| HPGDS    | -0.9938 | -0.9717 | -1.0434 | 0.036718433 | 0.06065 |
| PTPRN2   | -5.1237 | -5.1962 | -5.2201 | 0.050200299 | 0.06015 |
| ANGPT1   | -1.2249 | -0.8989 | -1.1215 | 0.166592477 | 0.0596  |
| SIGLEC10 | -2.6558 | -2.7826 | -2.7785 | 0.072053614 | 0.0593  |
| REG3G    | -0.7618 | -1.7117 | -1.2956 | 0.476163778 | 0.05885 |
| MGMT     | -0.5427 | -0.935  | -0.7976 | 0.199061155 | 0.05875 |
| WNT9A    | -1.4355 | -1.4911 | -1.5219 | 0.043789192 | 0.0586  |
| USO1     | 0.388   | 1.0952  | 0.6831  | 0.355209389 | 0.0585  |
| CHAD     | -5.2312 | -4.9311 | -5.1391 | 0.153734847 | 0.05795 |
| NEFL     | -2.073  | -1.6178 | -1.9032 | 0.230033418 | 0.0578  |
| AKT2     | 3.4716  | 3.3177  | 3.3371  | 0.083817083 | 0.05755 |
| SERPINA3 | -1.4028 | -1.2321 | -1.3738 | 0.091340371 | 0.05635 |
| MYO6     | 1.3897  | 1.1663  | 1.2219  | 0.116301161 | 0.0561  |
| CHAC2    | 0.1789  | 0.5987  | 0.3332  | 0.212340442 | 0.0556  |
| IL7      | 0.3554  | 0.7604  | 0.503   | 0.204965656 | 0.0549  |
| EDAR     | -3.4274 | -3.5045 | -3.5205 | 0.049779547 | 0.05455 |
| IL6ST    | -1.1418 | -1.14   | -1.1952 | 0.031363036 | 0.0543  |
| COMMD9   | 0.3952  | 0.3829  | 0.3348  | 0.031919325 | 0.05425 |
| WASF1    | -0.0035 | 0.0825  | -0.0123 | 0.052377603 | 0.0518  |
| NPDC1    | -3.7285 | -4.4258 | -4.1287 | 0.349918024 | 0.05155 |
| PADI4    | -1.6079 | -1.5229 | -1.6169 | 0.051868423 | 0.0515  |
| ATF4     | 0.4698  | 0.2971  | 0.3321  | 0.091297663 | 0.05135 |
| DHRS4L2  | 0.9166  | 0.5626  | 0.6884  | 0.179451423 | 0.0512  |
| BTN3A2   | -3.1063 | -2.8904 | -3.0492 | 0.111870952 | 0.05085 |
| SNCG     | -4.0936 | -5.2259 | -4.7106 | 0.56691069  | 0.05085 |
| RBP2     | -3.0252 | -2.9309 | -3.0288 | 0.055512551 | 0.05075 |
| TMED8    | -0.5943 | -0.4103 | -0.5526 | 0.096474677 | 0.0503  |

|             |         |         |         |             |         |
|-------------|---------|---------|---------|-------------|---------|
| TPMT        | 4.3763  | 4.6376  | 4.4568  | 0.133819891 | 0.05015 |
| NPTX1       | 5.042   | 5.1182  | 5.0313  | 0.047385898 | 0.0488  |
| MTSS1       | 5.3173  | 5.284   | 5.2521  | 0.032602505 | 0.04855 |
| SERPINE2    | 0.23    | 0.2226  | 0.1781  | 0.028073178 | 0.0482  |
| AMDHD2      | 1.1868  | 0.9745  | 1.0326  | 0.109715192 | 0.04805 |
| COL9A1      | 6.979   | 6.9957  | 6.9393  | 0.028971078 | 0.04805 |
| IL12A_IL12B | -7.2604 | -7.5803 | -7.4655 | 0.162060205 | 0.04515 |
| VWA5A       | -0.5592 | -1.6093 | -1.129  | 0.525685289 | 0.04475 |
| SERPINI2    | -2.0885 | -2.0149 | -2.0964 | 0.044947414 | 0.0447  |
| STXBP3      | 0.5481  | 0.3486  | 0.4039  | 0.102998366 | 0.04445 |
| ANKMY2      | 1.1748  | 1.1087  | 1.0975  | 0.041773077 | 0.04425 |
| IL17RB      | -4.1121 | -3.2546 | -3.7275 | 0.429507047 | 0.04415 |
| SH3GLB2     | -2.4329 | -2.3395 | -2.4302 | 0.053162236 | 0.044   |
| CLSPN       | 0.8387  | 0.6243  | 0.6878  | 0.11012903  | 0.0437  |
| CRYGD       | -3.8844 | -3.9343 | -3.953  | 0.035462797 | 0.04365 |
| TMPRSS15    | -3.6753 | -2.9699 | -3.3662 | 0.353597148 | 0.0436  |
| TREM2       | -8.4787 | -8.4109 | -8.4883 | 0.042189572 | 0.0435  |
| MYBPC2      | -1.8234 | -2.5508 | -2.2305 | 0.364562125 | 0.0434  |
| IFNW1       | -0.3631 | -0.3835 | -0.4165 | 0.026946614 | 0.0432  |
| MAPK13      | -0.0256 | -0.4353 | -0.2735 | 0.206352344 | 0.04305 |
| STX1B       | -0.5128 | -0.3479 | -0.473  | 0.086048494 | 0.04265 |
| METAP1      | 0.7833  | 0.6513  | 0.6749  | 0.07039356  | 0.0424  |
| GSTA1       | -0.9422 | -0.8921 | -0.9584 | 0.034564288 | 0.04125 |
| ADGRD1      | -6.8316 | -6.261  | -6.5862 | 0.28622851  | 0.0399  |
| DENND2B     | 0.7324  | 0.0387  | 0.3465  | 0.347581966 | 0.03905 |
| PRTG        | -5.8057 | -6.4613 | -6.1725 | 0.328572427 | 0.039   |
| YAP1        | 2.3506  | 2.4939  | 2.3836  | 0.075044409 | 0.03865 |
| GUCA2A      | -7.3781 | -7.8994 | -7.677  | 0.261583849 | 0.03825 |
| EVI2B       | -0.589  | -0.3081 | -0.4865 | 0.14214876  | 0.03795 |
| IL2         | -0.4819 | 1.4886  | 0.4663  | 0.985482181 | 0.03705 |
| MIF         | 5.1253  | 5.1527  | 5.102   | 0.025377615 | 0.037   |
| PZP         | -1.7186 | -1.4819 | -1.6369 | 0.120226716 | 0.03665 |
| DDAH1       | 1.2486  | 1.1733  | 1.1744  | 0.043160437 | 0.03655 |
| CALCA       | -4.2717 | -4.6533 | -4.4988 | 0.191947571 | 0.0363  |
| C5          | -1.0205 | -1.0044 | -1.0478 | 0.021939538 | 0.03535 |
| SOX9        | 3.3346  | 3.1529  | 3.2085  | 0.093101611 | 0.03525 |
| HADH        | -1.5133 | -1.8744 | -1.7286 | 0.181661287 | 0.03475 |
| PECR        | -0.1087 | -0.072  | -0.1236 | 0.026556418 | 0.03325 |
| PYDC1       | -1.0775 | -1.4604 | -1.3017 | 0.192381453 | 0.03275 |
| UBAC1       | -1.2439 | -1.2556 | -1.2825 | 0.019792507 | 0.03275 |
| GNPDA1      | 0.6295  | 0.4108  | 0.4875  | 0.110962892 | 0.03265 |
| EIF5        | 0.8652  | 0.35    | 0.575   | 0.258286688 | 0.0326  |
| ANGPTL2     | -5.7484 | -6.7307 | -6.2721 | 0.4915094   | 0.03255 |
| MSLN1       | -0.7944 | -0.2984 | -0.5789 | 0.248708832 | 0.0325  |
| AFP         | -2.8234 | -2.7933 | -2.8401 | 0.023717574 | 0.03175 |
| ITPR1       | -0.8766 | -0.5978 | -0.7685 | 0.140566437 | 0.0313  |
| KLK10       | -5.5372 | -5.7018 | -5.6504 | 0.084211401 | 0.0309  |
| DNMBP       | 1.4001  | 1.4007  | 1.3697  | 0.017727192 | 0.0307  |
| DTD1        | 3.7155  | 3.7983  | 3.7264  | 0.044989369 | 0.0305  |
| SHPK        | 0.1634  | 0.2897  | 0.1966  | 0.065474601 | 0.02995 |

|          |          |         |          |             |         |
|----------|----------|---------|----------|-------------|---------|
| FGD3     | -0.3332  | -0.8723 | -0.6325  | 0.270096693 | 0.02975 |
| PRAME    | 0.2613   | 0.4838  | 0.3429   | 0.112559333 | 0.02965 |
| FAM20A   | 0.263    | 0.1602  | 0.182    | 0.054166533 | 0.0296  |
| ADAMTS13 | -7.2381  | -7.4113 | -7.3541  | 0.088247833 | 0.0294  |
| CASP7    | 0.4977   | 0.5008  | 0.4703   | 0.016786006 | 0.02895 |
| RAD51    | 1.4953   | 1.4458  | 1.4432   | 0.02935819  | 0.02735 |
| PMCH     | -3.3026  | -3.7616 | -3.5589  | 0.230021006 | 0.0268  |
| CD248    | 0.3332   | 0.3882  | 0.3342   | 0.031469562 | 0.0265  |
| CPQ      | -0.341   | -0.3346 | -0.3637  | 0.015291937 | 0.0259  |
| CGN      | 0.1939   | -0.1261 | 0.008    | 0.160697241 | 0.0259  |
| SOD3     | -2.5288  | -2.5605 | -2.57    | 0.021573827 | 0.02535 |
| EIF2AK3  | -0.3139  | -0.3813 | -0.3729  | 0.036729461 | 0.0253  |
| SCGB3A1  | -1.2346  | -1.1309 | -1.2073  | 0.053752426 | 0.02455 |
| PPIB     | 5.4762   | 5.4752  | 5.452    | 0.013692334 | 0.0237  |
| GID8     | 0.4524   | -0.2036 | 0.1011   | 0.328275743 | 0.0233  |
| SMC3     | -0.6742  | -1.0738 | -0.8968  | 0.200233164 | 0.0228  |
| IL3RA    | 0.1578   | 0.1142  | 0.1134   | 0.025406561 | 0.0226  |
| ESM1     | -6.5136  | -6.7031 | -6.6301  | 0.095578502 | 0.02175 |
| LMOD2    | -0.5154  | 0.1246  | -0.2163  | 0.320227424 | 0.0209  |
| RNASSET2 | 1.8066   | 1.6972  | 1.731    | 0.056015117 | 0.0209  |
| TXNDC9   | -0.827   | -0.7598 | -0.8137  | 0.035585437 | 0.0203  |
| VSNL1    | -0.5907  | -0.9018 | -0.7665  | 0.15598875  | 0.02025 |
| CASC3    | 0.2403   | 0.264   | 0.232    | 0.016606123 | 0.02015 |
| LHB      | -2.0038  | -2.0539 | -2.048   | 0.027381441 | 0.01915 |
| MAPKAPK2 | -0.9569  | -0.8283 | -0.9112  | 0.065190567 | 0.0186  |
| IFNLR1   | -4.5511  | -5.4156 | -5.0014  | 0.432375604 | 0.01805 |
| GNPDA2   | 2.7427   | 2.8237  | 2.7653   | 0.041797767 | 0.0179  |
| ESPL1    | 0.1793   | 0.0298  | 0.0867   | 0.075457074 | 0.01785 |
| DRG2     | 0.289    | 0.2711  | 0.2625   | 0.013519246 | 0.01755 |
| EIF2S2   | 0.5881   | 0.0822  | 0.3178   | 0.253148264 | 0.01735 |
| PVALB    | -4.101   | -3.5747 | -3.8548  | 0.263331901 | 0.01695 |
| CA11     | -0.6929  | -0.5379 | -0.632   | 0.078090354 | 0.0166  |
| FES      | 1.5322   | 1.7095  | 1.6049   | 0.089127007 | 0.01595 |
| MAN2B2   | -2.6888  | -2.9138 | -2.8169  | 0.112859957 | 0.0156  |
| PNLIPRP2 | -9.5863  | -9.4947 | -9.556   | 0.046666083 | 0.0155  |
| COL4A4   | 0.1175   | 0.615   | 0.3509   | 0.248907821 | 0.01535 |
| SLC51B   | -2.4557  | -2.6168 | -2.5515  | 0.081029768 | 0.01525 |
| TNN      | 3.2541   | 3.3056  | 3.265    | 0.027139823 | 0.01485 |
| LTA      | -3.7011  | -3.3629 | -3.5468  | 0.16931575  | 0.0148  |
| CA8      | 0.6195   | 0.4418  | 0.5162   | 0.089240817 | 0.01445 |
| CCL17    | -3.4879  | -3.222  | -3.3692  | 0.133204317 | 0.01425 |
| F11      | -3.3515  | -3.471  | -3.4251  | 0.060282695 | 0.01385 |
| SOST     | -10.7951 | -9.405  | -10.1134 | 0.695092735 | 0.01335 |
| EGFLAM   | -2.6367  | -2.5512 | -2.6069  | 0.043398886 | 0.01295 |
| NXPH1    | -0.2392  | -0.467  | -0.3659  | 0.114139491 | 0.0128  |
| KLK4     | -2.3261  | -2.2703 | -2.311   | 0.028862144 | 0.0128  |
| XPNPEP2  | -6.9372  | -7.2649 | -7.1133  | 0.164002571 | 0.01225 |
| RTKN2    | -0.5182  | -1.0677 | -0.8047  | 0.274833738 | 0.01175 |
| IL17RA   | -0.4785  | -0.712  | -0.6067  | 0.116937006 | 0.01145 |
| IFI30    | -2.3244  | -1.8628 | -2.1045  | 0.23088578  | 0.0109  |



|          |         |         |         |             |          |
|----------|---------|---------|---------|-------------|----------|
| SLURP1   | -1.3647 | -1.4146 | -1.4004 | 0.025710374 | 0.01075  |
| PPP1R12B | -1.5552 | -1.5887 | -1.5827 | 0.017862904 | 0.01075  |
| NPL      | -0.6311 | -0.8908 | -0.7713 | 0.129987422 | 0.01035  |
| LIFR     | -6.2712 | -6.3224 | -6.3069 | 0.02625573  | 0.0101   |
| IL22     | -1.5423 | -1.5994 | -1.5808 | 0.029122214 | 0.00995  |
| DCTN6    | -1.3346 | -0.6811 | -1.0173 | 0.326795548 | 0.00945  |
| AMN      | -0.6442 | -0.8785 | -0.7706 | 0.117271665 | 0.00925  |
| MPI      | -2.4176 | -2.2185 | -2.3272 | 0.09969007  | 0.00915  |
| SYNGAP1  | -0.5295 | -0.0459 | -0.2966 | 0.241854591 | 0.0089   |
| COCH     | -1.3126 | -1.243  | -1.2865 | 0.035160631 | 0.0087   |
| HAVCR1   | -6.9954 | -6.6259 | -6.8186 | 0.184807007 | 0.00795  |
| NUP50    | 0.4648  | 0.1433  | 0.2976  | 0.160793128 | 0.00645  |
| RGL2     | -1.0442 | -0.7584 | -0.9074 | 0.142943392 | 0.0061   |
| MKI67    | 2.4321  | 2.4166  | 2.4183  | 0.008500784 | 0.00605  |
| ARMCX2   | -0.7566 | -1.0594 | -0.914  | 0.151439625 | 0.006    |
| ALDH2    | -0.4256 | -0.6363 | -0.5367 | 0.105402293 | 0.00575  |
| MATN3    | -3.5938 | -3.5846 | -3.5946 | 0.005556978 | 0.0054   |
| CPOX     | 0.0788  | 0.3176  | 0.1929  | 0.119439204 | 0.0053   |
| CD209    | -5.4413 | -5.8005 | -5.6262 | 0.179626065 | 0.0053   |
| DNAJB2   | 3.1356  | 3.2338  | 3.1795  | 0.0491917   | 0.0052   |
| VWC2L    | -2.6197 | -2.1024 | -2.3662 | 0.25866709  | 0.00515  |
| CDH5     | -5.565  | -5.8714 | -5.7226 | 0.15322106  | 0.0044   |
| REXO2    | 1.0115  | 0.8723  | 0.9377  | 0.069642229 | 0.0042   |
| NID1     | 1.8433  | 2.0505  | 1.943   | 0.103624466 | 0.0039   |
| TRAF3IP2 | 0.4073  | 0.3229  | 0.3615  | 0.042251154 | 0.0036   |
| MAP2K6   | 2.2015  | 1.8574  | 2.026   | 0.17206153  | 0.00345  |
| ORM1     | -0.9866 | -0.8574 | -0.9254 | 0.064629818 | 0.0034   |
| CD40LG   | -5.2542 | -5.0509 | -5.1548 | 0.1016583   | 0.00225  |
| MUCL3    | -0.048  | -0.1446 | -0.0985 | 0.048316698 | 0.0022   |
| KDM3A    | 0.3605  | 0.2609  | 0.3088  | 0.04981208  | 0.0019   |
| STK11    | 1.4758  | 1.4935  | 1.4832  | 0.008889507 | 0.00145  |
| PHLDB2   | -1.7937 | -1.8501 | -1.8223 | 0.028200946 | 0.0004   |
| HSPB6    | -2.1242 | -2.0822 | -2.1035 | 0.021000714 | 0.0003   |
| SAT2     | 0.4352  | 0.5795  | 0.5071  | 0.072150144 | 0.00025  |
| NEXN     | 6.2861  | 6.2113  | 6.2485  | 0.037400178 | 0.0002   |
| B3GAT3   | 0.6692  | 0.4035  | 0.537   | 0.13285053  | -0.00065 |
| ROBO1    | -5.0824 | -4.8397 | -4.96   | 0.121351514 | -0.00105 |
| PPP1R14D | -0.1683 | -0.3635 | -0.2646 | 0.097602886 | -0.0013  |
| BAG6     | -0.7388 | -0.9372 | -0.8365 | 0.09920378  | -0.0015  |
| KRT8     | -0.0095 | 0.4492  | 0.222   | 0.229353359 | -0.00215 |
| GFOD2    | -2.0786 | -1.9965 | -2.0351 | 0.041074363 | -0.00245 |
| AOC1     | -0.9714 | -1.2995 | -1.1328 | 0.164057134 | -0.00265 |
| FCAMR    | -5.7548 | -5.9976 | -5.8734 | 0.121410763 | -0.0028  |
| XG       | -5.6836 | -5.7438 | -5.7099 | 0.03017985  | -0.0038  |
| SDK2     | -3.3076 | -2.6372 | -2.9684 | 0.335207955 | -0.004   |
| CHIT1    | -7.0669 | -7.5651 | -7.3119 | 0.249111247 | -0.0041  |
| NUDT15   | 1.1423  | 1.0132  | 1.0819  | 0.064594453 | -0.00415 |
| CCNE1    | 1.0146  | 1.0688  | 1.046   | 0.027213477 | -0.0043  |
| TEK      | -4.8474 | -4.9166 | -4.8773 | 0.034706243 | -0.0047  |
| SPON2    | -5.6388 | -6.0595 | -5.8444 | 0.210367876 | -0.00475 |

|           |         |         |         |             |          |
|-----------|---------|---------|---------|-------------|----------|
| AGER      | -7.0577 | -7.4019 | -7.225  | 0.172122311 | -0.0048  |
| CD80      | -1.5373 | -1.1615 | -1.3445 | 0.187921296 | -0.0049  |
| IRAG2     | 1.8314  | 1.7778  | 1.81    | 0.026980734 | -0.0054  |
| PRKAB1    | -0.3396 | -0.5414 | -0.4349 | 0.100951787 | -0.0056  |
| KRT6C     | 1.1987  | 0.7578  | 0.9852  | 0.220486515 | -0.00695 |
| LUZP2     | -5.9703 | -4.2511 | -5.1035 | 0.859610051 | -0.0072  |
| USP28     | 2.6974  | 2.8017  | 2.7568  | 0.052317715 | -0.00725 |
| SLC4A1    | -0.2727 | -0.2597 | -0.2583 | 0.007940613 | -0.0079  |
| CRISP3    | -3.8306 | -3.7283 | -3.7715 | 0.051355526 | -0.00795 |
| LAMTOR5   | -0.0232 | -0.3698 | -0.1884 | 0.173363087 | -0.0081  |
| CRTAM     | -5.2428 | -5.7209 | -5.4736 | 0.239097449 | -0.00825 |
| IGSF21    | -2.8059 | -3.0279 | -2.9086 | 0.111110339 | -0.0083  |
| ANGPTL1   | -0.1216 | -0.2484 | -0.1765 | 0.063589648 | -0.0085  |
| NCAM2     | -5.1526 | -5.1729 | -5.1542 | 0.011286718 | -0.00855 |
| IFIT3     | -0.2493 | -0.1343 | -0.1828 | 0.057734305 | -0.009   |
| RPGR      | -0.0457 | -0.2662 | -0.1463 | 0.110390685 | -0.00965 |
| SLC28A1   | -0.7654 | -0.5935 | -0.6698 | 0.086130386 | -0.00965 |
| ITIH3     | -1.8662 | -2.0952 | -1.971  | 0.114636876 | -0.0097  |
| SERPINB9  | -2.2077 | -2.4652 | -2.3266 | 0.128875534 | -0.00985 |
| BGLAP     | -2.4492 | -2.4456 | -2.4373 | 0.006102732 | -0.0101  |
| PKLR      | -0.6494 | -0.4886 | -0.5588 | 0.080615383 | -0.0102  |
| APOC1     | -1.5686 | -1.5811 | -1.5645 | 0.008646965 | -0.01035 |
| NME3      | 0.9372  | 1.0938  | 1.0265  | 0.078557134 | -0.011   |
| SPINK1    | -1.5268 | -1.7562 | -1.6302 | 0.114885392 | -0.0113  |
| PTPRK     | -1.4857 | -1.494  | -1.4785 | 0.007756503 | -0.01135 |
| PCBD1     | 5.1953  | 5.3964  | 5.3073  | 0.100767075 | -0.01145 |
| CA6       | -3.2607 | -3.3534 | -3.2956 | 0.046819049 | -0.01145 |
| CPB1      | -3.8599 | -4.409  | -4.1228 | 0.274632379 | -0.01165 |
| MCTS1     | 0.4547  | 0.3431  | 0.4117  | 0.05628724  | -0.0128  |
| PCNA      | -0.7214 | -0.758  | -0.7268 | 0.01975753  | -0.0129  |
| SELE      | -8.1921 | -7.9813 | -8.0738 | 0.105662813 | -0.0129  |
| JMJD1C    | -2.0528 | -1.638  | -1.8319 | 0.207546404 | -0.0135  |
| ACE2      | -2.9757 | -2.8033 | -2.8757 | 0.08656743  | -0.0138  |
| SERPINA11 | -4.0882 | -4.3781 | -4.2191 | 0.1451768   | -0.01405 |
| MPO       | -4.9053 | -4.8373 | -4.8567 | 0.035029321 | -0.0146  |
| IL12RB1   | -0.3612 | -0.4198 | -0.3757 | 0.03052054  | -0.0148  |
| FNTA      | -0.4085 | -0.4124 | -0.3956 | 0.008792611 | -0.01485 |
| AHSG      | -6.92   | -6.4379 | -6.664  | 0.241204484 | -0.01495 |
| EP300     | 0.4037  | 0.4102  | 0.422   | 0.009277033 | -0.01505 |
| PLXNB3    | -1.486  | -1.7046 | -1.58   | 0.109656372 | -0.0153  |
| PTGDS     | -4.3411 | -3.9408 | -4.1253 | 0.200353845 | -0.01565 |
| COL2A1    | 6.2298  | 6.1818  | 6.2218  | 0.025716402 | -0.016   |
| PRG2      | 5.8379  | 5.8175  | 5.8439  | 0.013839075 | -0.0162  |
| REG3A     | -7.8288 | -7.7921 | -7.7937 | 0.020742308 | -0.01675 |
| AK1       | 0.0167  | -0.0116 | 0.0194  | 0.017171585 | -0.01685 |
| IPCEF1    | -2.1972 | -0.8109 | -1.4863 | 0.693225752 | -0.01775 |
| NFASC     | -0.0135 | -0.1175 | -0.0468 | 0.053108976 | -0.0187  |
| GRK5      | 0.5151  | 0.704   | 0.6284  | 0.095074935 | -0.01885 |
| SPRR1B    | -1.251  | -0.0895 | -0.6511 | 0.580855234 | -0.01915 |
| RRM2      | 4.2629  | 4.3435  | 4.3226  | 0.041827543 | -0.0194  |

|          |         |         |         |             |          |
|----------|---------|---------|---------|-------------|----------|
| PTH      | -5.548  | -3.6727 | -4.5901 | 0.937722886 | -0.02025 |
| STAU1    | -0.4016 | -0.3356 | -0.3483 | 0.035019471 | -0.0203  |
| MRPS16   | 0.3328  | 0.0431  | 0.2085  | 0.145335096 | -0.02055 |
| CNTN4    | -3.0357 | -3.313  | -3.1538 | 0.13915671  | -0.02055 |
| ESAM     | -2.6479 | -2.7493 | -2.6779 | 0.052089538 | -0.0207  |
| TSPAN1   | -0.1236 | -0.1279 | -0.105  | 0.012171415 | -0.02075 |
| CRLF1    | -3.1028 | -3.049  | -3.055  | 0.029482424 | -0.0209  |
| DBI      | 6.7109  | 6.8535  | 6.8033  | 0.07233321  | -0.0211  |
| CFD      | 2.4355  | 2.5802  | 2.5293  | 0.073402248 | -0.02145 |
| ATP6V1G1 | 2.8314  | 2.7728  | 2.8239  | 0.031888922 | -0.0218  |
| CRTAC1   | -6.0693 | -6.1905 | -6.1073 | 0.061988816 | -0.0226  |
| GPHA2    | 0.1756  | 0.2348  | 0.2278  | 0.032348313 | -0.0226  |
| BRD2     | -0.398  | -0.6239 | -0.4879 | 0.113731277 | -0.02305 |
| RARRES2  | -7.5322 | -7.3351 | -7.4097 | 0.099515342 | -0.02395 |
| DAAM1    | -0.1378 | 0.227   | 0.0694  | 0.182961125 | -0.0248  |
| PCDH12   | -2.0953 | -2.1206 | -2.0829 | 0.019214318 | -0.02505 |
| SULT1A1  | -3.5854 | -3.7881 | -3.6612 | 0.102417886 | -0.02555 |
| PIKFYVE  | 1.6475  | 1.486   | 1.5929  | 0.082149275 | -0.02615 |
| DPEP1    | -4.0491 | -4.3963 | -4.1964 | 0.1742628   | -0.0263  |
| GPD1     | -3.3203 | -3.4305 | -3.3482 | 0.057294182 | -0.0272  |
| CES1     | -6.2492 | -6.3007 | -6.2477 | 0.030175873 | -0.02725 |
| IL10RA   | -0.8516 | -0.7471 | -0.772  | 0.054583911 | -0.02735 |
| ATP1B3   | -0.0075 | -0.4126 | -0.1826 | 0.203169068 | -0.02745 |
| KCNH2    | -1.2175 | -1.547  | -1.3547 | 0.165516052 | -0.02755 |
| SIL1     | -1.8297 | -1.9574 | -1.8655 | 0.065871769 | -0.02805 |
| GADD45B  | -0.1168 | 0.2193  | 0.0797  | 0.168850832 | -0.02845 |
| NXPH3    | -4.3627 | -3.899  | -4.1023 | 0.232435202 | -0.02855 |
| ITGAM    | -0.9486 | -1.1878 | -1.0393 | 0.120758285 | -0.0289  |
| CDH6     | 1.9163  | 1.681   | 1.8286  | 0.118913932 | -0.02995 |
| ACHE     | -1.3251 | -1.0441 | -1.1546 | 0.14156359  | -0.03    |
| DCN      | -4.2387 | -5.3724 | -4.7754 | 0.56711721  | -0.03015 |
| CCL20    | -5.6854 | -5.1772 | -5.4011 | 0.254697513 | -0.0302  |
| BST2     | 1.3842  | 1.5001  | 1.4727  | 0.060574775 | -0.03055 |
| C1QBP    | 1.4579  | 1.4928  | 1.5063  | 0.024976055 | -0.03095 |
| DCBLD2   | -4.8836 | -4.775  | -4.798  | 0.057228082 | -0.0313  |
| GMPR     | -0.8255 | -0.5378 | -0.6502 | 0.14499146  | -0.03145 |
| COL1A1   | 0.018   | 0.053   | 0.0672  | 0.025322191 | -0.0317  |
| CRNN     | -6.6179 | -6.5485 | -6.551  | 0.039366272 | -0.0322  |
| EPGN     | 0.156   | 0.393   | 0.307   | 0.119976387 | -0.0325  |
| GDF15    | 4.7964  | 4.8046  | 4.833   | 0.019206596 | -0.0325  |
| CPXM2    | -3.09   | -3.1447 | -3.0847 | 0.033216913 | -0.03265 |
| TTR      | -5.3392 | -5.1471 | -5.2103 | 0.097904596 | -0.03285 |
| CA4      | -3.467  | -3.8311 | -3.6159 | 0.183053298 | -0.03315 |
| DDX39A   | 0.8223  | 0.9371  | 0.9134  | 0.060607948 | -0.0337  |
| SMAD5    | -4.6716 | -4.184  | -4.3937 | 0.244593629 | -0.0341  |
| MAMDC2   | -3.4233 | -3.4993 | -3.4269 | 0.042877189 | -0.0344  |
| SEMA3F   | -2.7177 | -3.2487 | -2.9488 | 0.266241814 | -0.0344  |
| WFIKKN2  | -2.1396 | -1.9918 | -2.0312 | 0.076537311 | -0.0345  |
| IL18RAP  | -5.3129 | -5.4255 | -5.3347 | 0.059719678 | -0.0345  |
| COL5A1   | 6.0715  | 6.2114  | 6.1761  | 0.07275445  | -0.03465 |

|          |         |         |         |             |          |
|----------|---------|---------|---------|-------------|----------|
| TGFBR2   | -4.1575 | -3.8424 | -3.9647 | 0.158859026 | -0.03525 |
| CAPN3    | -0.7734 | -0.833  | -0.7678 | 0.036135301 | -0.0354  |
| MAMDC4   | -2.4413 | -2.41   | -2.3899 | 0.025902574 | -0.03575 |
| PAK4     | -0.6248 | -0.4103 | -0.4816 | 0.109239935 | -0.03595 |
| NTF4     | 0.1694  | 0.3162  | 0.2789  | 0.076301791 | -0.0361  |
| ATRN     | 1.2488  | 1.3172  | 1.3192  | 0.040080585 | -0.0362  |
| AAMDC    | -0.1888 | -0.4254 | -0.2696 | 0.120264874 | -0.0375  |
| NELL2    | 2.5248  | 2.617   | 2.6086  | 0.050980127 | -0.0377  |
| TREH     | -2.0384 | -2.2253 | -2.0939 | 0.095984217 | -0.03795 |
| RBPMS    | 3.4634  | 3.5595  | 3.5498  | 0.052905986 | -0.03835 |
| EDA2R    | 1.6834  | 1.8828  | 1.8217  | 0.10216038  | -0.0386  |
| TSPAN7   | 0.1238  | -0.587  | -0.1929 | 0.356101657 | -0.0387  |
| COMT     | -1.5175 | -1.8506 | -1.645  | 0.168069043 | -0.03905 |
| SERPINF2 | -1.2234 | -1.1718 | -1.1576 | 0.034626194 | -0.04    |
| BAX      | 5.8247  | 5.528   | 5.7172  | 0.15021306  | -0.04085 |
| FIS1     | 3.4847  | 3.6092  | 3.5881  | 0.066629598 | -0.04115 |
| RABEPK   | 0.4786  | 0.273   | 0.4171  | 0.105529159 | -0.0413  |
| CPB2     | -1.8897 | -1.4271 | -1.6163 | 0.23257363  | -0.0421  |
| MYLPF    | -0.6837 | -1.1207 | -0.8598 | 0.219867013 | -0.0424  |
| GP1BA    | -6.5235 | -6.7755 | -6.6069 | 0.128378036 | -0.0426  |
| FSHB     | -0.4308 | -0.5551 | -0.4497 | 0.066978678 | -0.04325 |
| AGXT     | -1.3176 | -1.4278 | -1.3294 | 0.060505978 | -0.0433  |
| HGFAC    | -6.2576 | -7.2791 | -6.7248 | 0.51136852  | -0.04355 |
| CLTA     | 1.909   | 1.6043  | 1.8002  | 0.154410891 | -0.04355 |
| CLINT1   | -0.3706 | -0.0678 | -0.1745 | 0.153583821 | -0.0447  |
| MAP2K1   | 2.0453  | 2.0354  | 2.0853  | 0.026419753 | -0.04495 |
| ATP1B1   | -0.165  | -0.1929 | -0.1336 | 0.02966721  | -0.04535 |
| CRTAP    | 0.54    | 0.4935  | 0.5621  | 0.035015758 | -0.04535 |
| PRDX2    | 4.2839  | 4.373   | 4.3751  | 0.052058717 | -0.04665 |
| ZNRF4    | -0.3316 | -0.4836 | -0.3602 | 0.080776977 | -0.0474  |
| SCARF2   | -2.1036 | -2.5553 | -2.2817 | 0.227526357 | -0.04775 |
| GAD2     | 0.3154  | 0.1661  | 0.2888  | 0.079638077 | -0.04805 |
| PDCL2    | -0.0062 | -0.0209 | 0.0346  | 0.028754652 | -0.04815 |
| ACE      | -0.4234 | -0.4354 | -0.3811 | 0.0285242   | -0.0483  |
| PGLYRP2  | -3.01   | -2.6258 | -2.7689 | 0.194171943 | -0.049   |
| SSNA1    | 1.4297  | 1.3658  | 1.4477  | 0.04304033  | -0.04995 |
| CDC25A   | -0.0608 | -0.0416 | -0.0006 | 0.030750827 | -0.0506  |
| SMOC2    | -2.6992 | -2.4907 | -2.5439 | 0.108336344 | -0.05105 |
| SAP18    | -0.7997 | 0.2612  | -0.2181 | 0.531271409 | -0.05115 |
| KLHL41   | -1.129  | -1.6146 | -1.3201 | 0.244627887 | -0.0517  |
| IL31RA   | -2.6558 | -1.6049 | -2.0786 | 0.526298765 | -0.05175 |
| CLUL1    | -4.8218 | -5.476  | -5.097  | 0.328469603 | -0.0519  |
| VAV3     | 1.1921  | 1.2028  | 1.2495  | 0.030523597 | -0.05205 |
| MTIF3    | -0.061  | -0.4771 | -0.2167 | 0.210233941 | -0.05235 |
| MAP2     | 4.2955  | 4.2622  | 4.3313  | 0.034557537 | -0.05245 |
| NAPRT    | -0.1314 | -0.4155 | -0.221  | 0.145241879 | -0.05245 |
| INSL4    | -2.1213 | -2.0557 | -2.0355 | 0.044857255 | -0.053   |
| C7       | -2.5815 | -2.301  | -2.3882 | 0.143555436 | -0.05305 |
| UHRF2    | 0.8268  | 0.1037  | 0.5186  | 0.362859674 | -0.05335 |
| NOTCH3   | -6.6596 | -6.3923 | -6.4725 | 0.137166407 | -0.05345 |

|          |         |         |         |             |          |
|----------|---------|---------|---------|-------------|----------|
| VPS28    | -0.2231 | -0.2664 | -0.1913 | 0.037696463 | -0.05345 |
| SUMF1    | -0.6356 | -0.7646 | -0.6461 | 0.071639724 | -0.054   |
| LGMN     | -2.5322 | -2.4643 | -2.4441 | 0.046152031 | -0.05415 |
| SERPINA7 | -0.8076 | -0.73   | -0.7144 | 0.049918868 | -0.0544  |
| AREG     | -0.9734 | -0.9854 | -0.9248 | 0.032089251 | -0.0546  |
| GC       | -3.0497 | -2.7096 | -2.825  | 0.172952431 | -0.05465 |
| MRC1     | -4.1259 | -4.5147 | -4.2652 | 0.196985693 | -0.0551  |
| PTPRH    | -3.1743 | -2.5372 | -2.8005 | 0.320143129 | -0.05525 |
| VCAM1    | -4.3079 | -4.2857 | -4.2407 | 0.034238575 | -0.0561  |
| SIAE     | -1.2471 | -1.1392 | -1.1367 | 0.063030178 | -0.05645 |
| ADRA2A   | -0.3721 | -0.4493 | -0.354  | 0.050612153 | -0.0567  |
| HBQ1     | -1.4966 | -1.2837 | -1.3332 | 0.111412312 | -0.05695 |
| LTA4H    | -1.0803 | -1.0134 | -0.9898 | 0.046944684 | -0.05705 |
| NBL1     | -4.811  | -5.0572 | -4.8762 | 0.127558144 | -0.0579  |
| IL9      | -1.9793 | -0.9323 | -1.3972 | 0.52459213  | -0.0586  |
| EIF1AX   | 0.3056  | 0.4309  | 0.427   | 0.071242848 | -0.05875 |
| TXNL1    | 1.2068  | 1.2975  | 1.3111  | 0.056700882 | -0.05895 |
| PTPRC    | -2.167  | -2.8873 | -2.4679 | 0.361770936 | -0.05925 |
| POSTN    | 1.6978  | 1.655   | 1.7358  | 0.040423755 | -0.0594  |
| F9       | -1.955  | -1.7089 | -1.7719 | 0.12784093  | -0.06005 |
| RELB     | -2.3825 | -2.0784 | -2.1703 | 0.155965413 | -0.06015 |
| RNASE6   | 0.1304  | 0.1702  | 0.2107  | 0.040150509 | -0.0604  |
| SCN2A    | -0.2691 | -0.3644 | -0.2561 | 0.059132591 | -0.06065 |
| OPHN1    | -0.8771 | -0.9375 | -0.846  | 0.046525298 | -0.0613  |
| LBP      | -5.0359 | -3.5738 | -4.2431 | 0.731918796 | -0.06175 |
| PRSS53   | -0.3816 | -0.3754 | -0.3163 | 0.036044741 | -0.0622  |
| LSM1     | 0.5642  | 0.2682  | 0.4785  | 0.15230812  | -0.0623  |
| CBLN4    | 0.5001  | 0.5557  | 0.5907  | 0.045688657 | -0.0628  |
| F12      | -1.1648 | -1.1972 | -1.1178 | 0.039923093 | -0.0632  |
| DLGAP5   | 2.139   | 2.1441  | 2.2051  | 0.036779115 | -0.06355 |
| PRUNE2   | 0.1807  | 0.0686  | 0.1884  | 0.067054381 | -0.06375 |
| FZD8     | -0.4689 | -0.3926 | -0.3669 | 0.053050573 | -0.06385 |
| HSD17B14 | 1.9076  | 1.8372  | 1.9364  | 0.051033061 | -0.064   |
| CTNNA1   | -0.0845 | -0.2597 | -0.1078 | 0.095141596 | -0.0643  |
| ABHD14B  | 1.2082  | 1.3555  | 1.3468  | 0.082646779 | -0.06495 |
| EREG     | 0.9794  | 0.6862  | 0.8978  | 0.151327107 | -0.065   |
| DGCR6    | -0.0706 | 0.3523  | 0.2059  | 0.214759408 | -0.06505 |
| ALDH3A1  | 0.2786  | 0.0267  | 0.2182  | 0.131513003 | -0.06555 |
| CLEC3B   | -0.7636 | -0.6278 | -0.6301 | 0.077748719 | -0.0656  |
| SLC39A14 | -3.7273 | -4.1741 | -3.885  | 0.226597418 | -0.0657  |
| KLK7     | -1.587  | -1.4704 | -1.4628 | 0.06961676  | -0.0659  |
| LDLR     | 0.7331  | 0.7717  | 0.8186  | 0.042817092 | -0.0662  |
| ISM2     | 0.411   | 0.5383  | 0.5409  | 0.074258625 | -0.06625 |
| SERPINC1 | -2.4955 | -2.1897 | -2.2758 | 0.157689008 | -0.0668  |
| RANBP2   | 0.6406  | 0.3469  | 0.5607  | 0.151851978 | -0.06695 |
| CD3D     | -0.0235 | 0.2405  | 0.1756  | 0.13756745  | -0.0671  |
| FHIP2A   | -0.005  | -0.4732 | -0.172  | 0.237283824 | -0.0671  |
| BTD      | 0.5534  | 0.6176  | 0.6527  | 0.050355635 | -0.0672  |
| PDZD2    | 0.5862  | 0.0304  | 0.3755  | 0.280595242 | -0.0672  |
| GAMT     | 0.4295  | 0.0271  | 0.2957  | 0.204928508 | -0.0674  |

|           |         |         |         |             |          |
|-----------|---------|---------|---------|-------------|----------|
| SNAPIN    | 0.9539  | 0.939   | 1.014   | 0.039705205 | -0.06755 |
| KIR3DL2   | -0.8972 | -0.8397 | -0.8004 | 0.048684323 | -0.06805 |
| C1S       | -3.5807 | -3.4228 | -3.4336 | 0.088211356 | -0.06815 |
| OXT       | 1.8002  | 1.7379  | 1.8374  | 0.050274878 | -0.06835 |
| MMP15     | 0.1327  | 0.0692  | 0.1695  | 0.050738841 | -0.06855 |
| ABRAXAS2  | 0.2507  | -0.3637 | 0.0127  | 0.30978711  | -0.0692  |
| PLA2G2A   | -5.4876 | -5.3123 | -5.3302 | 0.096458333 | -0.06975 |
| DLK1      | -3.6473 | -3.7643 | -3.636  | 0.071037056 | -0.0698  |
| GAST      | -2.4139 | -2.5065 | -2.3904 | 0.06138162  | -0.0698  |
| CSF2      | 1.0354  | 0.9751  | 1.0763  | 0.050908971 | -0.07105 |
| SHBG      | -5.968  | -6.4784 | -6.1519 | 0.258498749 | -0.0713  |
| GBP4      | -0.2507 | -0.1337 | -0.1205 | 0.071665054 | -0.0717  |
| RPS10     | 0.6543  | 0.0592  | 0.4296  | 0.300507975 | -0.07285 |
| ROBO2     | -1.5003 | -1.7363 | -1.5454 | 0.125281563 | -0.0729  |
| CAMKK1    | -0.3626 | -0.027  | -0.1218 | 0.173012061 | -0.073   |
| SERPINF1  | 0.433   | 0.4778  | 0.5287  | 0.047882391 | -0.0733  |
| NDUFS6    | 1.2171  | 1.0843  | 1.2242  | 0.078801713 | -0.0735  |
| PDGFRA    | -3.0651 | -3.4592 | -3.1882 | 0.201622345 | -0.07395 |
| JAM3      | 0.9782  | 1.0224  | 1.0745  | 0.048203976 | -0.0742  |
| GP2       | -0.3321 | -0.3636 | -0.273  | 0.045995326 | -0.07485 |
| CPLX2     | 0.2505  | 0.1906  | 0.2954  | 0.052578608 | -0.07485 |
| ACSL1     | 0.1071  | -0.2499 | 0.004   | 0.183731607 | -0.0754  |
| FABP3     | -2.1659 | -1.6345 | -1.8239 | 0.269327038 | -0.0763  |
| TF        | -3.0345 | -2.7202 | -2.8003 | 0.163324901 | -0.07705 |
| BABAM1    | 0.6495  | 0.3316  | 0.5676  | 0.165057576 | -0.07705 |
| F13B      | -2.2338 | -2.1776 | -2.1282 | 0.052836477 | -0.0775  |
| HEPH      | -4.6054 | -4.4762 | -4.463  | 0.078681468 | -0.0778  |
| CLEC7A    | -4.2441 | -4.2164 | -4.1523 | 0.047087401 | -0.07795 |
| MMP10     | -4.3264 | -4.3073 | -4.2389 | 0.046006558 | -0.07795 |
| KIAA1549L | 0.5855  | 0.985   | 0.8632  | 0.204757084 | -0.07795 |
| ITIH4     | -2.8603 | -2.7102 | -2.7068 | 0.087658257 | -0.07845 |
| C3        | -6.0567 | -5.8749 | -5.8871 | 0.101623685 | -0.0787  |
| MMP3      | -4.4708 | -4.6368 | -4.4747 | 0.094734383 | -0.0791  |
| CRELD1    | -4.5884 | -4.9069 | -4.6682 | 0.165724661 | -0.07945 |
| BRD1      | 0.6975  | 0.3687  | 0.6126  | 0.17068717  | -0.0795  |
| PDE5A     | 1.3173  | 1.3406  | 1.4087  | 0.047494666 | -0.07975 |
| PIK3IP1   | -2.7263 | -2.9758 | -2.7708 | 0.133076106 | -0.08025 |
| ID4       | -0.9531 | -1.495  | -1.1437 | 0.274892603 | -0.08035 |
| ART3      | 1.1843  | 1.3165  | 1.3309  | 0.080804043 | -0.0805  |
| COL4A1    | -3.5617 | -3.5323 | -3.4662 | 0.048911178 | -0.0808  |
| SULT2A1   | -2.164  | -2.1592 | -2.0807 | 0.046769256 | -0.0809  |
| TIE1      | -9.6026 | -8.6348 | -9.037  | 0.486193555 | -0.0817  |
| VWF       | -6.4732 | -6.3355 | -6.3226 | 0.083474607 | -0.08175 |
| FXYS5     | 0.5845  | -0.4219 | 0.1632  | 0.505416769 | -0.0819  |
| SORCS2    | -2.3479 | -1.5534 | -1.8684 | 0.400078222 | -0.08225 |
| SMTN      | 0.2306  | 0.3091  | 0.3528  | 0.061920352 | -0.08295 |
| LILRA5    | -7.0162 | -6.7212 | -6.7847 | 0.155268316 | -0.084   |
| WFDC12    | -5.3699 | -5.1057 | -5.1526 | 0.140961307 | -0.0852  |
| MOG       | -4.7169 | -4.8412 | -4.6938 | 0.079278896 | -0.08525 |
| DMD       | 3.3195  | 3.3494  | 3.4199  | 0.051550008 | -0.08545 |

|          |         |         |         |             |          |
|----------|---------|---------|---------|-------------|----------|
| TAF5     | -3.9548 | -3.9184 | -3.8511 | 0.052611691 | -0.0855  |
| MFAP3    | 1.7956  | 1.4861  | 1.7265  | 0.162458826 | -0.08565 |
| IL7R     | -3.7544 | -3.7457 | -3.6639 | 0.049928582 | -0.08615 |
| PPP1R12A | 4.6014  | 4.6407  | 4.7075  | 0.053640687 | -0.08645 |
| PM20D1   | -5.8807 | -5.8504 | -5.7787 | 0.052381581 | -0.08685 |
| NPHS2    | -0.8006 | -1.2052 | -0.9149 | 0.208582414 | -0.088   |
| PCDH7    | -4.6741 | -4.6635 | -4.5801 | 0.051484496 | -0.0887  |
| MMP13    | 6.3655  | 6.1797  | 6.3621  | 0.106303779 | -0.0895  |
| SEMA7A   | 5.316   | 5.3146  | 5.4052  | 0.051908509 | -0.0899  |
| CPTP     | 0.2472  | 0.4439  | 0.4359  | 0.11132728  | -0.09035 |
| INSL5    | -4.224  | -4.7187 | -4.3805 | 0.252850278 | -0.09085 |
| RNASE4   | -2.6725 | -2.4147 | -2.4527 | 0.139174279 | -0.0909  |
| C1QTNF5  | 0.4987  | 0.5105  | 0.596   | 0.053098619 | -0.0914  |
| ROBO4    | -1.6022 | -2.2219 | -1.8202 | 0.314355155 | -0.09185 |
| GFRA3    | -7.4052 | -6.7285 | -6.975  | 0.342480457 | -0.09185 |
| MASP1    | -2.1042 | -2.152  | -2.0362 | 0.058192898 | -0.0919  |
| CD27     | -5.3509 | -5.1203 | -5.1437 | 0.126922391 | -0.0919  |
| FLT3LG   | -4.0388 | -3.9611 | -3.907  | 0.066251214 | -0.09295 |
| SKIV2L   | 0.3332  | -0.2926 | 0.1141  | 0.317551922 | -0.0938  |
| ICAM4    | -4.1387 | -4.0343 | -3.9923 | 0.075383818 | -0.0942  |
| GH2      | -5.0783 | -5.8087 | -5.3493 | 0.369227464 | -0.0942  |
| SPRED2   | 0.879   | 0.4188  | 0.7432  | 0.236453322 | -0.0943  |
| SIGLEC1  | -3.9575 | -3.809  | -3.7888 | 0.092123088 | -0.09445 |
| SCN3B    | 0.2413  | 0.0941  | 0.2627  | 0.091789397 | -0.095   |
| TXK      | -1.1616 | -0.6051 | -0.788  | 0.283643444 | -0.09535 |
| LRRN1    | -4.7178 | -4.4522 | -4.4895 | 0.143791249 | -0.0955  |
| APOB     | -0.0783 | -0.2023 | -0.0447 | 0.083008755 | -0.0956  |
| OMG      | -0.7424 | -0.7564 | -0.6534 | 0.055865911 | -0.096   |
| C2orf69  | 0.802   | 0.2997  | 0.6469  | 0.257199384 | -0.09605 |
| ASGR2    | -2.0349 | -1.8549 | -1.8488 | 0.105727969 | -0.0961  |
| GGT5     | -5.5003 | -4.1627 | -4.7349 | 0.67112142  | -0.0966  |
| ZBTB16   | 1.7825  | 2.1414  | 2.0587  | 0.187942784 | -0.09675 |
| CD1C     | -2.1898 | -2.2674 | -2.1312 | 0.068320519 | -0.0974  |
| SFTPA2   | -4.3385 | -5.1644 | -4.654  | 0.416765166 | -0.09745 |
| DOC2B    | 0.1935  | 0.4332  | 0.4109  | 0.132423651 | -0.09755 |
| RBPM5    | 1.4932  | 1.5025  | 1.5958  | 0.056742312 | -0.09795 |
| PLAUR    | 3.595   | 3.696   | 3.7439  | 0.076011644 | -0.0984  |
| ATP2B4   | 0.4388  | 0.0921  | 0.3639  | 0.182430873 | -0.09845 |
| BCL2     | -1.4318 | -1.3714 | -1.3028 | 0.064543422 | -0.0988  |
| PTPN9    | 0.9276  | 0.8688  | 0.9974  | 0.064378361 | -0.0992  |
| SIT1     | -1.3684 | -1.3422 | -1.256  | 0.058808503 | -0.0993  |
| CD33     | -3.066  | -3.0454 | -2.9563 | 0.058305603 | -0.0994  |
| LCN2     | -4.9576 | -4.538  | -4.6483 | 0.217522696 | -0.0995  |
| GUCY2C   | -2.2523 | -1.9587 | -2.0054 | 0.15776642  | -0.1001  |
| TNFRSF4  | -6.6916 | -6.8662 | -6.6786 | 0.10475998  | -0.1003  |
| CD48     | 0.8859  | 1.0962  | 1.0916  | 0.120110879 | -0.10055 |
| NEDD4L   | 0.9643  | 0.8295  | 0.9976  | 0.089010805 | -0.1007  |
| TACSTD2  | -3.5185 | -3.3507 | -3.333  | 0.10237218  | -0.1016  |
| ARNTL    | 0.5034  | 0.6714  | 0.6898  | 0.102719294 | -0.1024  |
| PGM2     | 1.0962  | 0.545   | 0.923   | 0.281869852 | -0.1024  |

|          |         |         |         |             |          |
|----------|---------|---------|---------|-------------|----------|
| PMVK     | -3.0906 | -2.9816 | -2.9335 | 0.080493292 | -0.1026  |
| ITGA6    | -1.4812 | -1.527  | -1.4011 | 0.063723962 | -0.103   |
| CFI      | -0.9652 | -0.7726 | -0.7656 | 0.113272474 | -0.1033  |
| PTPRR    | -1.9883 | -1.9045 | -1.8421 | 0.073360571 | -0.1043  |
| RTN4R    | -5.4781 | -5.6827 | -5.4755 | 0.118883528 | -0.1049  |
| FKBP1B   | -0.6959 | -0.5484 | -0.5169 | 0.095559318 | -0.10525 |
| SPTLC1   | 0.1844  | 0.1424  | 0.2688  | 0.064374322 | -0.1054  |
| HLA-E    | -0.0054 | -0.3261 | -0.0597 | 0.17164204  | -0.10605 |
| IL24     | 1.6249  | 1.2811  | 1.5592  | 0.182507781 | -0.1062  |
| ENPEP    | -0.4131 | -0.4201 | -0.3103 | 0.061472053 | -0.1063  |
| ARHGEF10 | 0.2046  | 0.3546  | 0.3868  | 0.097239978 | -0.1072  |
| PSMA1    | -0.7276 | -1.8277 | -1.1699 | 0.553556703 | -0.10775 |
| SLAMF6   | -1.824  | -1.6238 | -1.616  | 0.11790171  | -0.1079  |
| ASS1     | -0.2773 | -0.5002 | -0.2808 | 0.127693004 | -0.10795 |
| PBXIP1   | -3.5963 | -3.4071 | -3.3937 | 0.113301192 | -0.108   |
| NCK2     | 3.5744  | 3.657   | 3.7238  | 0.074839116 | -0.1081  |
| UPK3A    | 0.0888  | -0.2353 | 0.0351  | 0.173705047 | -0.10835 |
| CALY     | 0.2416  | -0.1789 | 0.1407  | 0.21952419  | -0.10935 |
| SERPINA1 | -0.8949 | -0.575  | -0.6254 | 0.172001172 | -0.10955 |
| STK24    | 0.3852  | 0.9234  | 0.765   | 0.276585683 | -0.1107  |
| EPHX2    | 0.2797  | 0.1155  | 0.3087  | 0.104186435 | -0.1111  |
| CXCL1    | -2.2786 | -2.0344 | -2.0454 | 0.137923215 | -0.1111  |
| SAA4     | -0.8807 | -0.626  | -0.6422 | 0.142604804 | -0.11115 |
| DAB2     | -1.8729 | -1.7059 | -1.6779 | 0.105434024 | -0.1115  |
| SELP     | -4.8509 | -5.0978 | -4.8625 | 0.139319932 | -0.11185 |
| NELL1    | -3.4189 | -3.203  | -3.1987 | 0.125909584 | -0.11225 |
| PTPRS    | -1.1518 | -1.1998 | -1.0626 | 0.069623368 | -0.1132  |
| DEFB116  | -0.6805 | -0.8581 | -0.6561 | 0.110258121 | -0.1132  |
| RAC3     | -0.908  | -1.4206 | -1.0511 | 0.264501613 | -0.1132  |
| AOC3     | -4.6824 | -4.5507 | -4.5033 | 0.092797683 | -0.11325 |
| GORASP2  | 0.3566  | 0.481   | 0.5323  | 0.090348898 | -0.1135  |
| CDH17    | -3.6368 | -3.5873 | -3.4983 | 0.0701825   | -0.11375 |
| EPHA1    | -4.4055 | -4.7443 | -4.4603 | 0.181862805 | -0.1146  |
| CD36     | -0.6648 | -0.9196 | -0.6775 | 0.143583158 | -0.1147  |
| MANSC4   | -0.9242 | -1.9228 | -1.3085 | 0.503695169 | -0.115   |
| MRPL52   | -0.3005 | -0.5644 | -0.3173 | 0.147751966 | -0.11515 |
| NGF      | -0.0829 | -0.0715 | 0.0383  | 0.066927125 | -0.1155  |
| MLLT1    | -0.0534 | 0.2992  | 0.2384  | 0.188489894 | -0.1155  |
| SIRT5    | 0.247   | -0.0629 | 0.2078  | 0.168746921 | -0.11575 |
| BCAN     | -3.8259 | -4.4207 | -4.0068 | 0.304911206 | -0.1165  |
| DSG2     | -4.1516 | -4.5141 | -4.216  | 0.193398216 | -0.11685 |
| SLIT2    | -2.863  | -1.0483 | -1.8381 | 0.909884621 | -0.11755 |
| KLK3     | -1.3883 | -1.4925 | -1.3228 | 0.0855823   | -0.1176  |
| VSTM2B   | -1.6935 | -1.3975 | -1.4279 | 0.162830955 | -0.1176  |
| S100G    | 0.9676  | 0.999   | 1.1014  | 0.069969231 | -0.1181  |
| CNTN5    | 0.1683  | 0.2198  | 0.3122  | 0.072912299 | -0.11815 |
| BPIFB2   | -4.3643 | -4.4593 | -4.2934 | 0.083241236 | -0.1184  |
| TARBP2   | 2.4279  | 2.2369  | 2.451   | 0.11751129  | -0.1186  |
| TIMP2    | -2.9534 | -2.8818 | -2.799  | 0.077267673 | -0.1186  |
| FOSB     | 1.5692  | 1.4762  | 1.6414  | 0.082817953 | -0.1187  |



|           |         |         |         |             |          |
|-----------|---------|---------|---------|-------------|----------|
| SCGB3A2   | -5.6478 | -5.4732 | -5.4418 | 0.110985825 | -0.1187  |
| SCN2B     | 0.5939  | 0.4425  | 0.6373  | 0.102268079 | -0.1191  |
| MYL3      | -2.2813 | -2.6032 | -2.3231 | 0.175034692 | -0.11915 |
| WFIKKN1   | -3.227  | -3.4714 | -3.2299 | 0.140274742 | -0.1193  |
| GP6       | -5.3697 | -5.6448 | -5.3879 | 0.153844543 | -0.11935 |
| PDCD1LG2  | -3.1709 | -3.7462 | -3.3389 | 0.295828605 | -0.11965 |
| CACNA1C   | 0.3353  | 0.1563  | 0.3662  | 0.113323887 | -0.1204  |
| ZNF830    | 0.1382  | 0.2847  | 0.3319  | 0.101003119 | -0.12045 |
| MME       | -5.8598 | -5.2071 | -5.4129 | 0.333689112 | -0.12055 |
| KLKB1     | -0.9251 | -0.7186 | -0.7003 | 0.124841353 | -0.12155 |
| AP2B1     | -0.119  | -0.0747 | 0.0248  | 0.07364462  | -0.12165 |
| SMOC1     | -1.8546 | -1.5735 | -1.5923 | 0.157147457 | -0.12175 |
| FGF2      | -0.0197 | -0.0793 | 0.0726  | 0.076534371 | -0.1221  |
| ADAMTSL4  | -2.2976 | -2.5546 | -2.304  | 0.146566435 | -0.1221  |
| NLGN2     | -0.4908 | -0.1766 | -0.2113 | 0.172262387 | -0.1224  |
| SCN3A     | 0.1278  | -0.4309 | -0.0291 | 0.288156942 | -0.12245 |
| A_AMY1B_A | -2.8764 | -3.0177 | -2.8244 | 0.100028813 | -0.12265 |
| TNFRSF6B  | -5.9088 | -6.0941 | -5.8787 | 0.116647089 | -0.12275 |
| THRAP3    | -0.8035 | -0.1865 | -0.3707 | 0.316737136 | -0.1243  |
| PRR4      | -0.5489 | -0.3092 | -0.3045 | 0.13976739  | -0.12455 |
| PNMA1     | 0.848   | 0.0167  | 0.5577  | 0.421903382 | -0.12535 |
| PFDN2     | 2.9089  | 2.4028  | 2.7825  | 0.263402816 | -0.12665 |
| S100P     | -2.4731 | -2.9199 | -2.5698 | 0.235071315 | -0.1267  |
| CD276     | -0.2639 | -0.163  | -0.0866 | 0.088931678 | -0.12685 |
| TNFRSF13B | -8.2963 | -8.3477 | -8.1945 | 0.077969481 | -0.1275  |
| ATP6V1F   | 3.2311  | 3.3126  | 3.3999  | 0.084416606 | -0.12805 |
| FZD10     | -0.5137 | -0.3218 | -0.2897 | 0.121128045 | -0.12805 |
| NRGN      | 4.892   | 4.8683  | 5.0083  | 0.07493039  | -0.12815 |
| MUC2      | 0.0505  | 0.0023  | 0.1555  | 0.078335262 | -0.1291  |
| CSDE1     | 1.5121  | 1.4291  | 1.6001  | 0.085512182 | -0.1295  |
| MRPL46    | 0.1864  | -0.0312 | 0.2072  | 0.132046053 | -0.1296  |
| NCAM1     | 0.3939  | 0.4718  | 0.5636  | 0.084944825 | -0.13075 |
| ARHGAP30  | -0.4796 | -0.2753 | -0.2463 | 0.1271537   | -0.13115 |
| SUSD5     | -1.5287 | -1.2885 | -1.2774 | 0.141992335 | -0.1312  |
| POF1B     | -1.456  | -0.565  | -0.8793 | 0.451893863 | -0.1312  |
| SERPING1  | -2.8931 | -2.7012 | -2.6659 | 0.122264427 | -0.13125 |
| IGLC2     | -0.5954 | -0.5271 | -0.4299 | 0.083169486 | -0.13135 |
| IL13RA2   | 0.012   | -0.0425 | 0.1163  | 0.080690954 | -0.13155 |
| WFDC2     | -6.2566 | -6.1271 | -6.0603 | 0.09980496  | -0.13155 |
| BMPER     | -4.9782 | -5.1037 | -4.9092 | 0.098608232 | -0.13175 |
| IDI2      | -0.4301 | -0.6295 | -0.398  | 0.125421303 | -0.1318  |
| CCL22     | -6.5642 | -6.5198 | -6.4095 | 0.079655027 | -0.1325  |
| VGF       | -2.1608 | -2.4033 | -2.1493 | 0.143442497 | -0.13275 |
| ECHDC3    | -2.3972 | -2.7347 | -2.4321 | 0.18560308  | -0.13385 |
| AFM       | -1.9892 | -1.7056 | -1.7133 | 0.161559617 | -0.1341  |
| ICAM2     | -6.1041 | -6.0467 | -5.9412 | 0.082625077 | -0.1342  |
| AMY2A     | -6.0911 | -6.5813 | -6.202  | 0.257054903 | -0.1342  |
| CASP10    | 0.5542  | 0.5158  | 0.6704  | 0.080496542 | -0.1354  |
| FABP6     | -1.312  | -1.9223 | -1.4815 | 0.315039939 | -0.13565 |
| NPTX2     | 1.4248  | 1.6702  | 1.6833  | 0.145610794 | -0.1358  |

|           |         |         |         |             |          |
|-----------|---------|---------|---------|-------------|----------|
| KIF22     | 0.4367  | -0.4501 | 0.1292  | 0.450288607 | -0.1359  |
| ASPN      | -1.7603 | -1.9653 | -1.7262 | 0.129329437 | -0.1366  |
| PLIN1     | -0.923  | -1.2288 | -0.9391 | 0.172094422 | -0.1368  |
| SCRG1     | 1.6639  | 1.7063  | 1.8221  | 0.081888786 | -0.137   |
| HMGCL     | -0.1167 | -0.2153 | -0.0289 | 0.093252131 | -0.1371  |
| SLITRK2   | -6.8284 | -6.837  | -6.6946 | 0.079847939 | -0.1381  |
| LYVE1     | -1.3196 | -1.3446 | -1.1936 | 0.08093413  | -0.1385  |
| CSPG5     | -0.1627 | 0.1029  | 0.1091  | 0.155164987 | -0.139   |
| OSBPL2    | 0.4027  | 0.1843  | 0.4327  | 0.13558584  | -0.1392  |
| RLN1      | -1.7681 | -2.0312 | -1.76   | 0.154292288 | -0.13965 |
| ST3GAL1   | -4.0843 | -3.7384 | -3.7708 | 0.191040493 | -0.14055 |
| IL36A     | 0.277   | 0.0281  | 0.2932  | 0.148599944 | -0.14065 |
| TNFRSF1B  | -3.3065 | -3.5844 | -3.3039 | 0.161201437 | -0.14155 |
| CD2       | -0.6514 | -0.7703 | -0.5681 | 0.101620979 | -0.14275 |
| UBE2Z     | -0.0257 | -0.2517 | 0.0042  | 0.139913557 | -0.1429  |
| CD74      | -4.1448 | -4.0721 | -3.9652 | 0.090341076 | -0.14325 |
| CFHR4     | 0.0302  | 0.0669  | 0.1926  | 0.085167619 | -0.14405 |
| GSTA3     | -2.1546 | -2.1595 | -2.0129 | 0.083261095 | -0.14415 |
| ERBB3     | -6.1875 | -5.9774 | -5.9381 | 0.134093786 | -0.14435 |
| ANXA5     | 3.2276  | 2.9954  | 3.2563  | 0.143067199 | -0.1448  |
| PRKG1     | 4.8601  | 4.9297  | 5.0402  | 0.090820721 | -0.1453  |
| HDAC8     | 0.6175  | 0.7496  | 0.8289  | 0.106793305 | -0.14535 |
| MMP12     | -7.6481 | -7.4731 | -7.415  | 0.121337147 | -0.1456  |
| CDK5RAP3  | -0.0767 | -0.1048 | 0.0555  | 0.085598423 | -0.14625 |
| PRND      | -3.7884 | -3.7787 | -3.6362 | 0.0852107   | -0.14735 |
| ENPP5     | -1.5382 | -1.6757 | -1.4592 | 0.109559345 | -0.14775 |
| NTRK2     | -2.6725 | -3.0082 | -2.6924 | 0.18833487  | -0.14795 |
| TNFRSF10C | -7.5211 | -6.9907 | -7.1075 | 0.278696777 | -0.1484  |
| PON3      | -8.7336 | -7.8407 | -8.1382 | 0.454656981 | -0.14895 |
| PALM2     | 1.7125  | 1.9387  | 1.9748  | 0.142168292 | -0.1492  |
| IL1R1     | -4.9224 | -4.533  | -4.5785 | 0.212904446 | -0.1492  |
| FABP1     | -8.824  | -8.1416 | -8.3333 | 0.351948183 | -0.1495  |
| GRIK2     | -1.2056 | -1.0785 | -0.9924 | 0.107255039 | -0.14965 |
| NPPB      | -0.2589 | -0.8828 | -0.4209 | 0.323740333 | -0.14995 |
| DPP4      | -6.5047 | -6.782  | -6.4931 | 0.163550736 | -0.15025 |
| A1BG      | -2.1364 | -1.849  | -1.8424 | 0.167868163 | -0.1503  |
| IL34      | -2.312  | -2.9102 | -2.4587 | 0.311773524 | -0.1524  |
| CDHR2     | -2.8526 | -2.9152 | -2.7314 | 0.093443958 | -0.1525  |
| AMFR      | 1.6366  | 1.1905  | 1.5663  | 0.239851669 | -0.15275 |
| CST3      | 2.6912  | 2.8183  | 2.9077  | 0.108795695 | -0.15295 |
| FGF21     | -1.8309 | -1.7133 | -1.6184 | 0.106451883 | -0.1537  |
| PCDH9     | -2.3881 | -2.8201 | -2.4494 | 0.233737809 | -0.1547  |
| IGF2BP3   | 0.2449  | 0.3043  | 0.4299  | 0.094453445 | -0.1553  |
| ITGAX     | -1.9655 | 0.0095  | -0.8222 | 0.991588354 | -0.1558  |
| IL12B     | -8.6309 | -8.6444 | -8.4812 | 0.090578309 | -0.15645 |
| SERPINA4  | -6.0179 | -5.4999 | -5.6017 | 0.274441761 | -0.1572  |
| LEPR      | -2.6891 | -3.1289 | -2.7517 | 0.237915475 | -0.1573  |
| GNGT1     | 0.7075  | 0.4118  | 0.7174  | 0.173650924 | -0.15775 |
| CES2      | -3.2495 | -3.2526 | -3.0931 | 0.091205647 | -0.15795 |
| CD300A    | -1.0124 | -0.9263 | -0.8103 | 0.101417964 | -0.15905 |

|            |         |         |         |             |          |
|------------|---------|---------|---------|-------------|----------|
| COQ7       | -0.4655 | -0.9367 | -0.5417 | 0.252936382 | -0.1594  |
| POMC       | -2.1101 | -1.9944 | -1.8923 | 0.108970745 | -0.15995 |
| GSAP       | -1.666  | -1.3433 | -1.3445 | 0.18596549  | -0.16015 |
| C1GALT1C1  | 0.0609  | -0.4256 | -0.0216 | 0.260353766 | -0.16075 |
| AZU1       | -6.22   | -5.9392 | -5.9183 | 0.168477664 | -0.1613  |
| PGLYRP1    | -8.3275 | -8.1951 | -8.0998 | 0.114352627 | -0.1615  |
| APOA1      | -2.9475 | -2.5906 | -2.6074 | 0.201381835 | -0.16165 |
| GAD1       | 0.2582  | 0.4236  | 0.5027  | 0.124762588 | -0.1618  |
| MDK        | -0.5372 | -0.5769 | -0.3949 | 0.095698642 | -0.16215 |
| CTSF       | -3.6765 | -3.3549 | -3.3535 | 0.186081308 | -0.1622  |
| DCLRE1C    | 0.6363  | -0.6163 | 0.1724  | 0.633279514 | -0.1624  |
| INHBC      | -5.977  | -6.7161 | -6.1836 | 0.381337257 | -0.16295 |
| L6-OID2091 | -1.4892 | -1.3677 | -1.265  | 0.112231294 | -0.16345 |
| SERPIND1   | -4.5333 | -4.4897 | -4.3471 | 0.097387679 | -0.1644  |
| CRYM       | -0.247  | 0.3455  | 0.2139  | 0.311127953 | -0.16465 |
| UMOD       | -7.1494 | -6.4227 | -6.6213 | 0.375593854 | -0.16475 |
| THBS4      | -5.7934 | -5.8785 | -5.671  | 0.104307254 | -0.16495 |
| EPN1       | -0.1411 | -0.2893 | -0.0496 | 0.120962515 | -0.1656  |
| AMBN       | 0.5335  | 0.6541  | 0.7596  | 0.113134006 | -0.1658  |
| FCRLB      | -2.4244 | -2.4835 | -2.2878 | 0.100375013 | -0.16615 |
| ADAMTSL2   | -2.1478 | -1.9175 | -1.8661 | 0.15001941  | -0.16655 |
| SPINK2     | -7.1074 | -6.5554 | -6.6648 | 0.292280436 | -0.1666  |
| LPP        | 0.5966  | -0.5171 | 0.207   | 0.565160252 | -0.16725 |
| PRSS8      | -7.7496 | -8.059  | -7.7364 | 0.182562026 | -0.1679  |
| IL21R      | -0.4726 | -0.2857 | -0.2106 | 0.134917024 | -0.16855 |
| CLEC5A     | -6.1378 | -4.9803 | -5.3901 | 0.586912484 | -0.16895 |
| F2         | -0.8589 | -0.8256 | -0.6732 | 0.09901106  | -0.16905 |
| CYTL1      | 0.8763  | 0.932   | 1.0737  | 0.101774375 | -0.16955 |
| LEG1       | -6.6886 | -6.6274 | -6.4884 | 0.102588563 | -0.1696  |
| BPIFB1     | -8.8684 | -9.2742 | -8.9013 | 0.225392421 | -0.17    |
| L6-OID2010 | -0.9349 | -1.0062 | -0.7994 | 0.105047751 | -0.17115 |
| NAA10      | 0.944   | 1.3906  | 1.3391  | 0.244338502 | -0.1718  |
| PVR        | -1.2937 | -1.6079 | -1.2787 | 0.185884946 | -0.1721  |
| CREBZF     | 0.5574  | 0.1674  | 0.535   | 0.218986879 | -0.1726  |
| FGF12      | -0.6145 | -0.7346 | -0.5018 | 0.1164196   | -0.17275 |
| TDO2       | 1.1312  | 0.8161  | 1.1465  | 0.186496765 | -0.17285 |
| VCPKMT     | -0.6719 | -0.8138 | -0.5698 | 0.122539803 | -0.17305 |
| CD163      | -5.4387 | -5.7596 | -5.4236 | 0.189780935 | -0.17555 |
| DCUN1D1    | 0.4846  | 0.417   | 0.6268  | 0.10708769  | -0.176   |
| NDUFB7     | -0.1891 | -0.2627 | -0.0498 | 0.108126361 | -0.1761  |
| ECE1       | -1.8188 | -1.7736 | -1.6199 | 0.104265638 | -0.1763  |
| CST7       | 4.0465  | 4.1281  | 4.2636  | 0.109659488 | -0.1763  |
| ENOX2      | 1.399   | 0.9602  | 1.3566  | 0.242031733 | -0.177   |
| MAN1A2     | -4.3573 | -4.455  | -4.2289 | 0.11339684  | -0.17725 |
| EXTL1      | -2.2361 | -2.7925 | -2.337  | 0.296434934 | -0.1773  |
| RGMB       | -1.4466 | -1.829  | -1.4597 | 0.217095931 | -0.1781  |
| ITM2A      | -2.2714 | -2.462  | -2.1882 | 0.140366805 | -0.1785  |
| HCG22      | -0.5231 | -0.91   | -0.5373 | 0.219392548 | -0.17925 |
| ANGPTL7    | -5.4908 | -4.9466 | -5.0388 | 0.291249744 | -0.1799  |
| NOTCH1     | -0.167  | -0.1655 | 0.0137  | 0.103896888 | -0.17995 |

|           |         |         |         |             |          |
|-----------|---------|---------|---------|-------------|----------|
| PCDH1     | -3.6852 | -3.5201 | -3.4218 | 0.133104257 | -0.18085 |
| HBZ       | -1.4404 | -1.5375 | -1.3077 | 0.115358673 | -0.18125 |
| FGF23     | -3.7324 | -4.0009 | -3.6853 | 0.170251784 | -0.18135 |
| CXCL14    | -0.0891 | -0.2125 | 0.0311  | 0.121803503 | -0.1819  |
| GHR       | -2.7522 | -2.5927 | -2.4896 | 0.132305593 | -0.18285 |
| CXCL13    | -5.1826 | -5.3184 | -5.0676 | 0.125543671 | -0.1829  |
| TFAP2A    | 0.3983  | 0.8257  | 0.7949  | 0.238366301 | -0.1829  |
| GIPC2     | 1.5242  | 1.4599  | 1.6757  | 0.110797398 | -0.18365 |
| INSR      | -0.3955 | -0.2947 | -0.1613 | 0.117477544 | -0.1838  |
| PLA2G10   | -5.2502 | -5.4943 | -5.1883 | 0.161788143 | -0.18395 |
| HRG       | -4.5608 | -4.5425 | -4.3673 | 0.106827103 | -0.18435 |
| IL1RL2    | -4.7963 | -6.0082 | -5.2174 | 0.615276558 | -0.18485 |
| FAP       | -3.3118 | -3.2786 | -3.1096 | 0.108434373 | -0.1856  |
| ABO       | -1.9187 | -1.861  | -1.7031 | 0.111613216 | -0.18675 |
| IFNAR1    | -4.3445 | -4.9655 | -4.4682 | 0.328696917 | -0.1868  |
| RIPK4     | -1.0189 | -1.2931 | -0.9691 | 0.17447143  | -0.1869  |
| RAB37     | -0.574  | 0.4784  | 0.1392  | 0.537161776 | -0.187   |
| RNASE10   | -1.4888 | -1.5396 | -1.3253 | 0.111980192 | -0.1889  |
| LRIG3     | -0.5208 | -0.6744 | -0.4081 | 0.133672448 | -0.1895  |
| NPY       | -4.6429 | -4.7106 | -4.487  | 0.114662592 | -0.18975 |
| MANSC1    | -4.0844 | -4.721  | -4.2129 | 0.336634673 | -0.1898  |
| HRC       | -3.3236 | -3.6936 | -3.3179 | 0.215283913 | -0.1907  |
| SIRPB1    | -3.4971 | -3.9446 | -3.5292 | 0.249614309 | -0.19165 |
| IL1RAP    | -4.7939 | -4.7111 | -4.5603 | 0.118438057 | -0.1922  |
| FSTL3     | -5.3343 | -5.0352 | -4.9923 | 0.186308534 | -0.19245 |
| RAB11FIP3 | -0.4739 | -1.2689 | -0.6784 | 0.412822702 | -0.193   |
| IL20      | 0.4052  | 0.0065  | 0.3991  | 0.228448995 | -0.19325 |
| SARG      | -2.1933 | -1.8941 | -1.8498 | 0.186849039 | -0.1939  |
| TPPP2     | 0.4759  | 0.5882  | 0.7261  | 0.125318089 | -0.19405 |
| CTLA4     | 0.7004  | 0.661   | 0.8752  | 0.114009532 | -0.1945  |
| SNX18     | 0.5851  | 0.6236  | 0.7989  | 0.11396109  | -0.19455 |
| VIPR1     | 1.0303  | 0.7902  | 1.105   | 0.164482593 | -0.19475 |
| SORBS1    | 0.7224  | 0.6882  | 0.9003  | 0.113874536 | -0.195   |
| HDAC9     | -0.5999 | -0.7747 | -0.4922 | 0.142571958 | -0.1951  |
| SOD1      | 5.2203  | 5.3939  | 5.5025  | 0.14234217  | -0.1954  |
| ERVV-1    | -0.0425 | -0.0485 | 0.15    | 0.112911839 | -0.1955  |
| CFC1      | -1.2287 | -1.1028 | -0.9701 | 0.1293149   | -0.19565 |
| MEP1A     | -3.4999 | -3.376  | -3.2416 | 0.129185564 | -0.19635 |
| CEACAM6   | -1.9651 | -1.9912 | -1.7803 | 0.114971779 | -0.19785 |
| ADA2      | -7.0175 | -6.8453 | -6.7335 | 0.143066465 | -0.1979  |
| LILRA6    | -4.3913 | -4.3699 | -4.1826 | 0.114815025 | -0.198   |
| ARNT      | -0.1646 | -0.0019 | 0.1149  | 0.140376743 | -0.19815 |
| SSH3      | -0.6098 | -0.5902 | -0.4016 | 0.114964748 | -0.1984  |
| SMPD1     | -3.2605 | -3.3303 | -3.0963 | 0.12013165  | -0.1991  |
| SLC12A2   | 0.5911  | 0.3497  | 0.6696  | 0.166719435 | -0.1992  |
| RBM25     | -0.0921 | -0.0037 | 0.1513  | 0.123209253 | -0.1992  |
| TST       | 0.0315  | 0.2532  | 0.3416  | 0.159753696 | -0.19925 |
| TSHB      | -6.979  | -6.9868 | -6.7836 | 0.115131982 | -0.1993  |
| ULBP2     | -1.1396 | -1.9026 | -1.3205 | 0.398692492 | -0.2006  |
| NFE2      | 1.2663  | 1.0872  | 1.3776  | 0.146513173 | -0.20085 |

|            |         |         |         |             |          |
|------------|---------|---------|---------|-------------|----------|
| SDC4       | -2.056  | -2.0989 | -1.8764 | 0.118041532 | -0.20105 |
| ELN        | -1.8873 | -2.3479 | -1.916  | 0.258041876 | -0.2016  |
| RICTOR     | -0.2307 | -0.3934 | -0.1104 | 0.142028389 | -0.20165 |
| IL17C      | -4.7082 | -4.0863 | -4.195  | 0.332151958 | -0.20225 |
| HAO1       | -4.9967 | -4.6391 | -4.6147 | 0.21385241  | -0.2032  |
| BHMT2      | 0.9254  | 0.3397  | 0.8363  | 0.31559332  | -0.20375 |
| PAMR1      | -5.866  | -6.1028 | -5.7801 | 0.167126868 | -0.2043  |
| FRZB       | -4.1188 | -4.2666 | -3.9884 | 0.139190661 | -0.2043  |
| NUDT10     | 0.838   | 0.5513  | 0.8996  | 0.185878249 | -0.20495 |
| OLFM4      | -0.7765 | -0.8837 | -0.6251 | 0.129928031 | -0.205   |
| OGN        | -5.4286 | -5.2336 | -5.1257 | 0.153522973 | -0.2054  |
| COLEC12    | -5.4364 | -5.5449 | -5.2841 | 0.131011564 | -0.20655 |
| SCARF1     | -5.1536 | -5.0099 | -4.8748 | 0.139422105 | -0.20695 |
| EFA1_DEFA1 | -1.4953 | -1.73   | -1.4054 | 0.16759637  | -0.20725 |
| ENOPH1     | 0.2499  | 0.2057  | 0.4351  | 0.121708011 | -0.2073  |
| ACAA1      | 0.0814  | 0.0904  | 0.2942  | 0.120346223 | -0.2083  |
| MED21      | 0.6273  | 0.1617  | 0.6028  | 0.262028249 | -0.2083  |
| PRL        | -6.8785 | -8.2014 | -7.331  | 0.672361116 | -0.20895 |
| PRTN3      | -5.8285 | -6.0131 | -5.711  | 0.152286911 | -0.2098  |
| MEGF10     | -3.9074 | -3.9529 | -3.7203 | 0.123274369 | -0.20985 |
| CNDP1      | -2.0468 | -2.3709 | -1.9987 | 0.202438163 | -0.21015 |
| DCDC2C     | -0.7685 | -0.2131 | -0.2802 | 0.303152453 | -0.2106  |
| PRAP1      | -4.5092 | -4.7725 | -4.4302 | 0.179228523 | -0.21065 |
| IL19       | -3.9744 | -3.9019 | -3.7266 | 0.12740433  | -0.21155 |
| AIF1L      | 1.1993  | 1.0517  | 1.338   | 0.143173054 | -0.2125  |
| TCTN3      | -3.7368 | -3.6979 | -3.5044 | 0.124475714 | -0.21295 |
| EIF5A      | -0.2029 | 0.1226  | 0.1729  | 0.204004077 | -0.21305 |
| JAM2       | -3.9154 | -3.2671 | -3.3781 | 0.346723997 | -0.21315 |
| ENSA       | 0.55    | 0.5239  | 0.7504  | 0.123924453 | -0.21345 |
| TAP1       | -2.2563 | -1.52   | -1.6739 | 0.38837539  | -0.21425 |
| PKD1       | -4.1802 | -3.6661 | -3.7089 | 0.285264304 | -0.21425 |
| MMP8       | -4.1959 | -4.3688 | -4.068  | 0.150959962 | -0.21435 |
| REN        | -1.9104 | -1.984  | -1.7326 | 0.129248959 | -0.2146  |
| TNFRSF1A   | 0.2568  | 0.2842  | 0.4852  | 0.124711881 | -0.2147  |
| SMARCA2    | -6.1632 | -5.6278 | -5.6806 | 0.295054729 | -0.2149  |
| PCDHB15    | -2.5555 | -3.5569 | -2.8409 | 0.515899073 | -0.2153  |
| MLN        | -2.5696 | -2.1365 | -2.1372 | 0.249848574 | -0.21585 |
| GAL        | -6.7851 | -6.6128 | -6.4829 | 0.151594932 | -0.21605 |
| SERPINA6   | -2.9656 | -2.8268 | -2.6801 | 0.142768215 | -0.2161  |
| CTSO       | -6.343  | -6.5807 | -6.2455 | 0.17241741  | -0.21635 |
| SMPD3      | -0.5216 | -0.8134 | -0.4508 | 0.192197225 | -0.2167  |
| C1QTNF6    | 0.2335  | -0.1579 | 0.2556  | 0.232617218 | -0.2178  |
| ANXA10     | -3.7427 | -2.1509 | -2.7285 | 0.805817457 | -0.2183  |
| TREML1     | 0.3151  | 0.0405  | 0.3974  | 0.186885018 | -0.2196  |
| CTSE       | -5.4118 | -5.4899 | -5.2311 | 0.132746337 | -0.21975 |
| ZP3        | -3.1501 | -3.257  | -2.9835 | 0.137831673 | -0.22005 |
| ANGPTL3    | -5.5399 | -6.1128 | -5.6062 | 0.313383062 | -0.22015 |
| NFIC       | -0.2966 | -0.0774 | 0.035   | 0.168642106 | -0.222   |
| CCL16      | -1.5749 | -1.5714 | -1.3502 | 0.128732138 | -0.22295 |
| ADH4       | -2.0844 | -2.132  | -1.8849 | 0.131100737 | -0.2233  |

|          |         |         |         |             |          |
|----------|---------|---------|---------|-------------|----------|
| SLC13A1  | 0.0605  | 0.3756  | 0.4416  | 0.203666893 | -0.22355 |
| COPB2    | 1.148   | 0.8899  | 1.2426  | 0.182556868 | -0.22365 |
| ISM1     | -5.7752 | -6.0457 | -5.6861 | 0.187270402 | -0.22435 |
| TCN1     | -0.2908 | -0.2901 | -0.0654 | 0.129933149 | -0.22505 |
| GZMA     | -6.6319 | -6.9792 | -6.5801 | 0.217018179 | -0.22545 |
| VAMP5    | 0.2826  | -0.0242 | 0.3551  | 0.201350019 | -0.2259  |
| RGS8     | -0.4732 | -1.1969 | -0.609  | 0.384666466 | -0.22605 |
| PNLIP    | -4.5291 | -4.1533 | -4.1147 | 0.228926102 | -0.2265  |
| ZP4      | 0.144   | -0.5578 | 0.0196  | 0.374475046 | -0.2265  |
| GCLM     | -1.2305 | -1.0452 | -0.9111 | 0.160382491 | -0.22675 |
| GBP2     | -0.8824 | -0.4121 | -0.4199 | 0.269304406 | -0.22735 |
| IL18BP   | -1.7528 | -1.8423 | -1.5697 | 0.138952402 | -0.22785 |
| BCAT2    | 0.2204  | 0.4034  | 0.5398  | 0.160265571 | -0.2279  |
| GALNT2   | -4.107  | -3.8125 | -3.7315 | 0.197607144 | -0.22825 |
| ITGA11   | -4.0321 | -4.0829 | -3.8289 | 0.134404167 | -0.2286  |
| BST1     | -4.3616 | -4.5879 | -4.2461 | 0.173867373 | -0.22865 |
| ACTN2    | -1.2801 | -1.1397 | -0.9806 | 0.149847267 | -0.2293  |
| CDK1     | 3.5821  | 3.5827  | 3.8123  | 0.132733166 | -0.2299  |
| TNFSF9   | 1.1035  | 1.2782  | 1.4214  | 0.159209893 | -0.23055 |
| KRT5     | -1.2281 | -1.8451 | -1.306  | 0.336002535 | -0.2306  |
| LIPF     | -4.2628 | -4.9667 | -4.3825 | 0.37662823  | -0.23225 |
| IFNL1    | -1.2995 | -1.8896 | -1.3614 | 0.324305633 | -0.23315 |
| CLEC10A  | -4.19   | -4.2528 | -3.9875 | 0.138644738 | -0.2339  |
| PLEKHO1  | 0.1651  | -0.1034 | 0.265   | 0.190521574 | -0.23415 |
| NRN1     | 0.3107  | 0.1837  | 0.4816  | 0.149488138 | -0.2344  |
| PROC     | -7.1994 | -7.1387 | -6.9344 | 0.138833221 | -0.23465 |
| TNFRSF14 | -2.5527 | -2.4479 | -2.265  | 0.145606055 | -0.2353  |
| EFEMP1   | -5.6048 | -5.2131 | -5.1731 | 0.238535036 | -0.23585 |
| BHLHE40  | 0.4159  | 0.7019  | 0.7948  | 0.19748064  | -0.2359  |
| HMCN2    | -7.5298 | -7.3757 | -7.2164 | 0.15670719  | -0.23635 |
| CLEC1B   | -5.3825 | -6.9158 | -5.9124 | 0.778739843 | -0.23675 |
| SSBP1    | 0.832   | 0.4959  | 0.9009  | 0.216693109 | -0.23695 |
| APOL1    | -4.7719 | -4.8771 | -4.5874 | 0.146647753 | -0.2371  |
| FOLR3    | -9.831  | -9.7799 | -9.5677 | 0.13962267  | -0.23775 |
| CEP152   | 0.8442  | 1.4506  | 1.3853  | 0.332859895 | -0.2379  |
| UNC79    | -0.3675 | 0.3305  | 0.2196  | 0.375097592 | -0.2381  |
| TNR      | -4.7085 | -4.1527 | -4.1923 | 0.310092524 | -0.2383  |
| RARRES1  | -0.9834 | -1.0013 | -0.754  | 0.137902175 | -0.23835 |
| TYRO3    | -6.5314 | -6.0982 | -6.0764 | 0.256632838 | -0.2384  |
| CEP350   | -0.5447 | -0.3392 | -0.2031 | 0.171970937 | -0.23885 |
| RBP1     | -1.4598 | -0.5039 | -0.7427 | 0.497494164 | -0.23915 |
| OSTN     | -0.0338 | -0.2218 | 0.1132  | 0.167917639 | -0.241   |
| SCGB1A1  | -4.5866 | -4.5021 | -4.303  | 0.145607932 | -0.24135 |
| COL3A1   | 0.7264  | 0.6046  | 0.9069  | 0.152096888 | -0.2414  |
| IL22RA1  | -0.6572 | -1.5071 | -0.8407 | 0.447230593 | -0.24145 |
| IGLON5   | 2.9863  | 2.8892  | 3.1794  | 0.147722747 | -0.24165 |
| YOD1     | -1.5379 | -2.019  | -1.5362 | 0.278255261 | -0.24225 |
| ARFIP1   | 0.7234  | 0.6408  | 0.9256  | 0.146525675 | -0.2435  |
| BNIP2    | 1.6645  | 1.2712  | 1.7117  | 0.241851532 | -0.24385 |
| LRRRC38  | -0.3873 | -0.5935 | -0.2462 | 0.174663934 | -0.2442  |

|             |         |         |         |             |          |
|-------------|---------|---------|---------|-------------|----------|
| NME1        | 0.9147  | 0.7478  | 1.0763  | 0.164257126 | -0.24505 |
| LYPD1       | 0.2685  | -0.0022 | 0.3786  | 0.195963066 | -0.24545 |
| RET         | -6.2421 | -6.2077 | -5.9793 | 0.142836597 | -0.2456  |
| DIPK1C      | -0.6891 | -0.8525 | -0.5252 | 0.163650064 | -0.2456  |
| PTH1R       | -3.0942 | -3.1183 | -2.8606 | 0.142337076 | -0.24565 |
| CCER2       | -3.2763 | -2.4486 | -2.6167 | 0.437496107 | -0.24575 |
| SLK         | -0.1762 | -0.6139 | -0.1489 | 0.260944304 | -0.24615 |
| STX5        | -0.708  | -0.335  | -0.2753 | 0.234493205 | -0.2462  |
| MBL2        | -3.6982 | -3.696  | -3.4497 | 0.142840692 | -0.2474  |
| SEZ6L       | -4.7529 | -5.085  | -4.6707 | 0.219351977 | -0.24825 |
| ARHGAP5     | -0.5272 | -0.4596 | -0.2448 | 0.147455394 | -0.2486  |
| CLASP1      | 0.5758  | 0.7823  | 0.9294  | 0.177629586 | -0.25035 |
| GUK1        | 0.2479  | 0.2967  | 0.5247  | 0.147751864 | -0.2524  |
| ATF2        | -0.524  | -0.5964 | -0.3052 | 0.151609498 | -0.255   |
| IL12RB2     | -0.1088 | -0.4178 | -0.0075 | 0.213732223 | -0.2558  |
| MFAP5       | -7.3046 | -7.0768 | -6.9347 | 0.186597276 | -0.256   |
| SERPINI1    | -3.652  | -3.7147 | -3.4271 | 0.151231092 | -0.25625 |
| CASQ2       | 0.1751  | -0.3072 | 0.1927  | 0.283673245 | -0.25875 |
| CSNK2A1     | 0.3739  | 0.0904  | 0.4914  | 0.206146994 | -0.25925 |
| TIGAR       | 1.1318  | 1.3288  | 1.4896  | 0.179204948 | -0.2593  |
| ICAM3       | 0.7539  | 0.8165  | 1.0449  | 0.153170014 | -0.2597  |
| EPO         | -3.0354 | -3.207  | -2.8614 | 0.172801389 | -0.2598  |
| EDNRB       | 0.2668  | -0.1074 | 0.3396  | 0.239838307 | -0.2599  |
| RTBDN       | -2.952  | -3.0419 | -2.737  | 0.156668982 | -0.25995 |
| CD83        | -6.2073 | -5.2999 | -5.4936 | 0.477888087 | -0.26    |
| FCGR2B      | -4.1551 | -3.6896 | -3.6618 | 0.277130529 | -0.26055 |
| L6-OID20563 | -1.0322 | -0.8576 | -0.6843 | 0.173950405 | -0.2606  |
| CELA2A      | -4.6204 | -4.6989 | -4.3984 | 0.15585597  | -0.26125 |
| CCT5        | -0.8438 | -0.5819 | -0.4515 | 0.199789498 | -0.26135 |
| VWC2        | -5.255  | -6.0253 | -5.3786 | 0.413694722 | -0.26155 |
| SCG3        | -1.724  | -1.3933 | -1.2961 | 0.224317015 | -0.26255 |
| CASP1       | -3.1216 | -2.9169 | -2.7561 | 0.183188873 | -0.26315 |
| BCL2L1      | 0.8065  | 0.8764  | 1.1059  | 0.156629403 | -0.26445 |
| KRT14       | -0.0539 | 0.0437  | 0.2595  | 0.160371943 | -0.2646  |
| NPPC        | -4.6349 | -4.8344 | -4.4699 | 0.182521916 | -0.26475 |
| PROCR       | 0.431   | -0.0585 | 0.4526  | 0.289050174 | -0.26635 |
| IL4         | 1.8838  | 1.7208  | 2.069   | 0.17421791  | -0.2667  |
| MYOM3       | -3.3551 | -3.2697 | -3.0456 | 0.159845874 | -0.2668  |
| CETN2       | -0.6213 | -0.9272 | -0.5074 | 0.217094473 | -0.26685 |
| STAM        | -0.0773 | 0.0457  | 0.2517  | 0.166235776 | -0.2675  |
| FGFR4       | -6.6671 | -6.803  | -6.4669 | 0.169072006 | -0.26815 |
| ARF6        | -2.5012 | -2.2185 | -2.0914 | 0.209765639 | -0.26845 |
| FCGR3B      | -4.0029 | -3.8312 | -3.6486 | 0.177177943 | -0.26845 |
| CD82        | 0.1863  | -0.3783 | 0.1725  | 0.322062168 | -0.2685  |
| ATXN2       | 0.3295  | -0.1333 | 0.3669  | 0.278622397 | -0.2688  |
| HIF1A       | 0.1483  | 0.5926  | 0.6398  | 0.271171096 | -0.26935 |
| COL15A1     | -4.7942 | -4.5618 | -4.408  | 0.194428496 | -0.27    |
| C1RL        | 0.5113  | 0.5262  | 0.7891  | 0.156264338 | -0.27035 |
| PLTP        | -6.6674 | -6.0434 | -6.083  | 0.349396508 | -0.2724  |
| ANXA3       | -4.6974 | -4.903  | -4.5272 | 0.188177682 | -0.273   |

|             |         |         |         |             |          |
|-------------|---------|---------|---------|-------------|----------|
| NRTN        | -1.2325 | -0.1935 | -0.4396 | 0.54295129  | -0.2734  |
| DSC2        | -4.2692 | -4.1112 | -3.9164 | 0.17671959  | -0.2738  |
| TRIM26      | 0.3383  | 0.3471  | 0.6173  | 0.158601429 | -0.2746  |
| GNLY        | -3.2849 | -2.8311 | -2.783  | 0.276933103 | -0.275   |
| ANKRD54     | 1.2168  | 1.3265  | 1.5474  | 0.168388074 | -0.27575 |
| RAPGEF2     | -0.6344 | -0.1959 | -0.1391 | 0.271056753 | -0.27605 |
| TP73        | 0.4328  | -0.3979 | 0.2956  | 0.44531423  | -0.27815 |
| ANP32C      | -0.1954 | -0.2625 | 0.0498  | 0.164396239 | -0.27875 |
| CCL15       | -9.2182 | -9.1029 | -8.8806 | 0.171602807 | -0.27995 |
| SFRP1       | -0.3137 | -0.3804 | -0.0668 | 0.165203642 | -0.28025 |
| NOS2        | 0.4452  | 0.0914  | 0.5486  | 0.23975607  | -0.2803  |
| NFAT5       | -0.5328 | -0.4474 | -0.2092 | 0.16770478  | -0.2809  |
| NMRK2       | 0.317   | 0.0175  | 0.4482  | 0.220762384 | -0.28095 |
| PECAM1      | -1.5979 | -1.7754 | -1.4043 | 0.185608198 | -0.28235 |
| EFNB2       | -1.1929 | -1.9476 | -1.287  | 0.411262135 | -0.28325 |
| DPP10       | -2.194  | -2.3093 | -1.9667 | 0.174324477 | -0.28495 |
| DCUN1D2     | 0.8202  | -0.1916 | 0.5993  | 0.531986663 | -0.285   |
| IGFL4       | -1.4628 | -1.5804 | -1.2362 | 0.174952832 | -0.2854  |
| CEACAM3     | -0.0287 | -0.0962 | 0.2247  | 0.169186593 | -0.28715 |
| CDH23       | 0.0573  | 0.1017  | 0.367   | 0.167466186 | -0.2875  |
| CKB         | 3.3296  | 3.2962  | 3.6006  | 0.166941067 | -0.2877  |
| RPL14       | 0.0358  | -0.146  | 0.2329  | 0.189501478 | -0.288   |
| CNTN1       | -4.408  | -4.4993 | -4.1655 | 0.172512985 | -0.28815 |
| DRAXIN      | -4.4419 | -4.1466 | -4.0058 | 0.222564575 | -0.28845 |
| NOMO1       | -0.7099 | -0.4139 | -0.2724 | 0.22325042  | -0.2895  |
| ATG4A       | 0.0312  | 0.0146  | 0.3135  | 0.167983164 | -0.2906  |
| CSF1        | -1.9064 | -1.7865 | -1.5557 | 0.178248488 | -0.29075 |
| FLT1        | 1.8595  | 1.9011  | 2.1714  | 0.169348881 | -0.2911  |
| TNFRSF8     | -5.1328 | -5.3884 | -4.9686 | 0.211551822 | -0.292   |
| AMBP        | -7.153  | -7.0999 | -6.8336 | 0.171148892 | -0.29285 |
| FCER2       | -2.4092 | -2.4299 | -2.1257 | 0.169969791 | -0.29385 |
| CRHBP       | -9.832  | -9.078  | -9.1608 | 0.413497537 | -0.2942  |
| FGA         | -5.9967 | -5.5854 | -5.4968 | 0.266745091 | -0.29425 |
| CCN2        | -4.0793 | -3.9673 | -3.7279 | 0.179507809 | -0.2954  |
| SRP14       | -1.4572 | -1.4633 | -1.1638 | 0.171182661 | -0.29645 |
| CEACAM8     | -5.1462 | -4.1344 | -4.3437 | 0.534096118 | -0.2966  |
| PO1-OID3147 | -6.0467 | -5.5045 | -5.4775 | 0.321117445 | -0.2981  |
| KIT         | 2.1224  | 2.2666  | 2.493   | 0.186813169 | -0.2985  |
| FCN2        | -8.0845 | -7.722  | -7.6047 | 0.250124496 | -0.29855 |
| HPSE        | -0.4934 | -1.0444 | -0.4694 | 0.325269632 | -0.2995  |
| CFP         | -2.0695 | -1.9948 | -1.7324 | 0.177045314 | -0.29975 |
| CALCB       | -2.7421 | -2.8187 | -2.4806 | 0.177276347 | -0.2998  |
| ASGR1       | -3.8049 | -4.5664 | -3.8854 | 0.418354614 | -0.30025 |
| IL2RB       | 0.2509  | 0.5484  | 0.6999  | 0.228421941 | -0.30025 |
| ZBP1        | -1.9148 | -1.9123 | -1.6127 | 0.173700326 | -0.30085 |
| TMEM132A    | -4.1133 | -3.403  | -3.4567 | 0.395502495 | -0.30145 |
| CRYBB2      | -1.2041 | -1.6271 | -1.1136 | 0.274105059 | -0.302   |
| IGFBP3      | -7.3193 | -7.7758 | -7.2446 | 0.287560365 | -0.30295 |
| DNAJC6      | -2.331  | -1.9487 | -1.8366 | 0.259213895 | -0.30325 |
| CLSTN3      | 0.154   | 0.1565  | 0.4588  | 0.175259132 | -0.30355 |



|             |         |         |         |             |          |
|-------------|---------|---------|---------|-------------|----------|
| CDH2        | -3.4916 | -3.5047 | -3.1944 | 0.175492421 | -0.30375 |
| SIGLEC9     | -6.5705 | -7.0724 | -6.5175 | 0.306220678 | -0.30395 |
| SFTPD       | -5.1804 | -6.6972 | -5.6336 | 0.778601036 | -0.3052  |
| SLITRK1     | -4.0652 | -3.6524 | -3.5524 | 0.271835637 | -0.3064  |
| CILP        | -4.3476 | -3.6011 | -3.6674 | 0.413184781 | -0.30695 |
| ARID3A      | -0.3093 | -0.3757 | -0.0354 | 0.180385818 | -0.3071  |
| CFH         | -7.2997 | -7.0482 | -6.8662 | 0.217676557 | -0.30775 |
| L6-OID21276 | -2.0401 | -2.1056 | -1.765  | 0.180729365 | -0.30785 |
| GABARAP     | 0.4335  | 0.25    | 0.65    | 0.200226746 | -0.30825 |
| CD3E        | -0.3096 | -0.2168 | 0.0451  | 0.183945436 | -0.3083  |
| DNM3        | -1.6234 | -2.0694 | -1.5358 | 0.286158092 | -0.3106  |
| FLT4        | -4.6801 | -4.5246 | -4.2916 | 0.195534098 | -0.31075 |
| EFNA1       | -0.9478 | -1.026  | -0.6742 | 0.184722964 | -0.3127  |
| CD3G        | 0.1202  | -0.9246 | -0.0886 | 0.552886438 | -0.3136  |
| TP53INP1    | -0.8331 | -0.9105 | -0.558  | 0.185259737 | -0.3138  |
| F10         | -3.6954 | -3.3863 | -3.2257 | 0.238730413 | -0.31515 |
| ODAM        | -1.8892 | -2.4061 | -1.832  | 0.316240483 | -0.31565 |
| TYRP1       | 1.3901  | 1.4574  | 1.74    | 0.185661906 | -0.31625 |
| TOP1        | -4.3594 | -4.0216 | -3.8741 | 0.248790802 | -0.3164  |
| NPHS1       | -2.8592 | -2.3074 | -2.2666 | 0.330989083 | -0.3167  |
| NEB         | -0.9481 | -0.6033 | -0.4588 | 0.251390062 | -0.3169  |
| CD300LG     | -1.8971 | -2.2327 | -1.7479 | 0.248300571 | -0.317   |
| TIMD4       | -4.845  | -4.6771 | -4.4428 | 0.202011444 | -0.31825 |
| B103A_DEFBI | -0.2837 | -1.177  | -0.4118 | 0.483033046 | -0.31855 |
| CD200       | -5.4133 | -7.1248 | -5.9503 | 0.875314372 | -0.31875 |
| USP47       | 1.0311  | 0.7525  | 1.2116  | 0.231290229 | -0.3198  |
| HTR1B       | -0.0925 | 0.2756  | 0.4114  | 0.260721582 | -0.31985 |
| SPARCL1     | -3.7774 | -4.127  | -3.6322 | 0.254339091 | -0.32    |
| ICOSLG      | -5.706  | -4.7962 | -4.9289 | 0.491465451 | -0.3222  |
| TNFSF14     | -5.2926 | -5.1982 | -4.9227 | 0.192196783 | -0.3227  |
| CSF2RB      | -1.0426 | -1.856  | -1.1265 | 0.447368048 | -0.3228  |
| LRTM1       | 0.0247  | -0.2886 | 0.1915  | 0.243746843 | -0.32345 |
| SOX2        | -0.245  | 0.0125  | 0.2073  | 0.226873158 | -0.32355 |
| NPR1        | -0.0864 | -0.2593 | 0.1516  | 0.206307707 | -0.32445 |
| ALDH5A1     | 0.2452  | 0.0847  | 0.4903  | 0.204265195 | -0.32535 |
| IL15RA      | -0.899  | -1.8421 | -1.0447 | 0.507692962 | -0.32585 |
| MTPN        | 2.9273  | 2.8477  | 3.2138  | 0.192547665 | -0.3263  |
| IL11        | -1.541  | -0.8097 | -0.8478 | 0.411658746 | -0.32755 |
| TBC1D23     | 0.1386  | 0.1948  | 0.4944  | 0.191273033 | -0.3277  |
| FCER1A      | -1.41   | -1.7584 | -1.2561 | 0.257349652 | -0.3281  |
| MCEE        | -0.2042 | 0.3805  | 0.4173  | 0.348685766 | -0.32915 |
| MFAP4       | -5.2623 | -4.9037 | -4.7532 | 0.261542546 | -0.3298  |
| KLRB1       | -7.998  | -7.8844 | -7.6111 | 0.198867401 | -0.3301  |
| GIPC3       | 0.1029  | -0.0149 | 0.3769  | 0.20102242  | -0.3329  |
| GIP         | -1.0326 | -1.4782 | -0.9224 | 0.294283605 | -0.333   |
| PPBP        | -4.9479 | -5.3798 | -4.8305 | 0.289266561 | -0.33335 |
| B104A_DEFBI | -0.9482 | -0.0993 | -0.188  | 0.46661957  | -0.33575 |
| MEGF11      | -0.2635 | -0.1857 | 0.1116  | 0.197964702 | -0.3362  |
| CPXM1       | -1.5839 | -1.6039 | -1.2571 | 0.194708534 | -0.3368  |
| DPEP2       | -8.3496 | -8.6242 | -8.1494 | 0.238369545 | -0.3375  |

|            |         |         |         |             |          |
|------------|---------|---------|---------|-------------|----------|
| DLL4       | -4.131  | -3.0225 | -3.2389 | 0.587571786 | -0.33785 |
| GZMB       | -0.8966 | -1.2161 | -0.7177 | 0.252483669 | -0.33865 |
| BTC        | -2.7098 | -2.6282 | -2.3301 | 0.199872568 | -0.3389  |
| HYAL1      | -1.2573 | -0.9587 | -0.7688 | 0.246257392 | -0.3392  |
| SPON1      | -6.8101 | -6.6009 | -6.3663 | 0.22202111  | -0.3392  |
| CCL24      | -4.1876 | -4.139  | -3.823  | 0.197969324 | -0.3403  |
| PTPRZ1     | -5.5226 | -5.257  | -5.0492 | 0.237287364 | -0.3406  |
| PALM3      | 1.8669  | 1.7793  | 2.1638  | 0.201520727 | -0.3407  |
| FOLH1      | -1.0732 | -0.732  | -0.5618 | 0.260421274 | -0.3408  |
| RALB       | 1.2182  | 0.8182  | 1.3595  | 0.280764249 | -0.3413  |
| CD38       | -6.1014 | -6.0187 | -5.7184 | 0.201539235 | -0.34165 |
| GAS6       | -3.1048 | -3.1101 | -2.7657 | 0.197327249 | -0.34175 |
| CNTF       | -0.1132 | 0.1972  | 0.3855  | 0.25182889  | -0.3435  |
| ADGRE1     | -3.5862 | -4.1527 | -3.5257 | 0.345859196 | -0.34375 |
| GLT8D2     | 0.108   | 0.2746  | 0.5353  | 0.215369969 | -0.344   |
| CLEC4M     | -6.4552 | -6.1993 | -5.982  | 0.236862245 | -0.34525 |
| UXS1       | -2.2962 | -2.3792 | -1.9921 | 0.203802282 | -0.3456  |
| ITPRIP     | -0.2984 | -0.0687 | 0.1624  | 0.230400354 | -0.34595 |
| JCHAIN     | -4.6808 | -3.483  | -3.7358 | 0.631355378 | -0.3461  |
| CRACR2A    | -2.3856 | -1.3378 | -1.5155 | 0.560734064 | -0.3462  |
| FTCD       | -3.1306 | -2.9235 | -2.6805 | 0.225288489 | -0.34655 |
| CACNA1H    | -0.8849 | -0.4139 | -0.3027 | 0.30907477  | -0.3467  |
| GABRA4     | 0.0725  | 0.0411  | 0.405   | 0.201645489 | -0.3482  |
| TRDMT1     | -0.9062 | -0.3991 | -0.3038 | 0.323810196 | -0.34885 |
| FAM13A     | -0.0139 | 0.327   | 0.5063  | 0.264250304 | -0.34975 |
| CNPY2      | -0.2321 | 0.036   | 0.2522  | 0.242613046 | -0.35025 |
| SCG2       | -2.5233 | -2.5599 | -2.1912 | 0.20312954  | -0.3504  |
| CA7        | -0.1608 | -0.4676 | 0.0368  | 0.254162468 | -0.351   |
| VTCN1      | -0.4889 | -0.3043 | -0.0449 | 0.223047648 | -0.3517  |
| MAP3K5     | 1.0988  | 1.3246  | 1.5646  | 0.232936071 | -0.3529  |
| ADAMTS16   | 0.6615  | 0.2683  | 0.8179  | 0.283174669 | -0.353   |
| RETN       | -7.1824 | -7.3759 | -6.9249 | 0.226255571 | -0.35425 |
| OD1-OID305 | -3.0652 | -2.2975 | -2.3265 | 0.4351019   | -0.35485 |
| KLF4       | -0.0101 | 0.0088  | 0.3549  | 0.20549429  | -0.35555 |
| ACA5_SPACA | -0.241  | -0.4537 | 0.0101  | 0.232164791 | -0.35745 |
| PLCB1      | 0.1067  | -0.1577 | 0.3327  | 0.245450443 | -0.3582  |
| TNFSF10    | -6.6388 | -5.848  | -5.8842 | 0.44648558  | -0.3592  |
| BRSK2      | 0.7687  | 0.2217  | 0.8554  | 0.343584434 | -0.3602  |
| RNASE3     | -5.5003 | -6.4962 | -5.6372 | 0.539820868 | -0.36105 |
| AKT3       | 1.1501  | 1.4731  | 1.6737  | 0.264173655 | -0.3621  |
| EVPL       | -0.3031 | -0.7747 | -0.1766 | 0.315206921 | -0.3623  |
| CHGA       | 2.8269  | 2.8668  | 3.2093  | 0.210209427 | -0.36245 |
| SUSD4      | -2.4885 | -2.9582 | -2.359  | 0.315285315 | -0.36435 |
| CABP2      | -1.2408 | -1.2949 | -0.9033 | 0.212204155 | -0.36455 |
| CD226      | -2.4539 | -2.1193 | -1.922  | 0.268887232 | -0.3646  |
| OTOA       | -0.3739 | -0.0645 | 0.1457  | 0.261373475 | -0.3649  |
| RBP7       | -6.1941 | -8.1751 | -6.8192 | 1.012717122 | -0.3654  |
| DDX4       | -0.4742 | 0.0952  | 0.1759  | 0.354344197 | -0.3654  |
| CTF1       | -0.7599 | -1.224  | -0.6256 | 0.313981916 | -0.36635 |
| ACTA2      | 1.7346  | 1.7164  | 2.0921  | 0.211852142 | -0.3666  |

|          |         |         |         |             |          |
|----------|---------|---------|---------|-------------|----------|
| SPTBN2   | -0.0902 | -0.5015 | 0.071   | 0.295214436 | -0.36685 |
| MMP1     | -6.214  | -5.95   | -5.7137 | 0.250277772 | -0.3683  |
| KCNC4    | -0.2566 | -0.3511 | 0.0651  | 0.218190887 | -0.36895 |
| CYP24A1  | -1.3177 | -1.4912 | -1.0353 | 0.230107518 | -0.36915 |
| CRX      | -0.2062 | -0.3972 | 0.0678  | 0.233731327 | -0.3695  |
| CORO6    | 0.0741  | 0.0396  | 0.428   | 0.214976751 | -0.37115 |
| MAPT     | 0.3752  | -0.3105 | 0.404   | 0.404459347 | -0.37165 |
| MRPL28   | -0.2551 | -0.1376 | 0.176   | 0.222859605 | -0.37235 |
| TPSD1    | 4.4927  | 4.4248  | 4.8317  | 0.217982805 | -0.37295 |
| BRME1    | -0.6503 | -0.1296 | -0.017  | 0.337855033 | -0.37295 |
| CGREF1   | -3.4021 | -3.9079 | -3.282  | 0.33216674  | -0.373   |
| MYOM2    | -2.0485 | -2.9101 | -2.1063 | 0.481627422 | -0.373   |
| VSIG10   | -1.4707 | -1.4016 | -1.0629 | 0.218248078 | -0.37325 |
| GATA3    | 0.2429  | -0.2401 | 0.3748  | 0.323725352 | -0.3734  |
| CEACAM20 | -0.2521 | -0.2351 | 0.1302  | 0.215980856 | -0.3738  |
| SPINK8   | -0.3581 | -0.5338 | -0.0703 | 0.233998426 | -0.37565 |
| FOS      | -1.8781 | -0.5326 | -0.8286 | 0.707040369 | -0.37675 |
| BTNL10   | -0.031  | 0.0872  | 0.4049  | 0.225430455 | -0.3768  |
| RASA1    | 0.9623  | 0.3526  | 1.0349  | 0.374730601 | -0.37745 |
| LRTM2    | -2.2268 | -2.3386 | -1.9051 | 0.225060133 | -0.3776  |
| HEPACAM2 | -3.9313 | -3.9642 | -3.5683 | 0.219692292 | -0.37945 |
| FCGR2A   | 1.167   | 1.307   | 1.6177  | 0.230674728 | -0.3807  |
| FN1      | -1.0991 | -0.9828 | -0.6593 | 0.227889586 | -0.38165 |
| PENK     | -2.7692 | -2.64   | -2.3226 | 0.229814041 | -0.382   |
| EPHA4    | -6.8833 | -6.9888 | -6.5528 | 0.227470328 | -0.38325 |
| ITIH1    | 1.3942  | 1.3959  | 1.7786  | 0.221444327 | -0.38355 |
| DNAJB8   | -0.2244 | -0.4715 | 0.0357  | 0.253627765 | -0.38365 |
| PIGR     | -3.326  | -3.2272 | -2.8929 | 0.226970461 | -0.3837  |
| TNFSF13B | -3.8128 | -3.9119 | -3.4785 | 0.22708767  | -0.38385 |
| CDKL5    | 0.363   | 0.0462  | 0.5899  | 0.273085927 | -0.3853  |
| TFF2     | -7.3615 | -7.6494 | -7.1192 | 0.265426619 | -0.38625 |
| IL32     | -5.3144 | -5.6704 | -5.1056 | 0.285579084 | -0.3868  |
| IGFBP4   | -3.68   | -3.8692 | -3.3871 | 0.242901715 | -0.3875  |
| CDAN1    | 0.5613  | 0.4804  | 0.9085  | 0.2274358   | -0.38765 |
| RANGAP1  | -1.0348 | -0.9261 | -0.5923 | 0.23059502  | -0.38815 |
| BAMBI    | 0.062   | 0.0943  | 0.4667  | 0.224910034 | -0.38855 |
| GLI2     | 0.903   | 0.8549  | 1.2677  | 0.225729757 | -0.38875 |
| PTEN     | -0.3069 | -1.1975 | -0.3616 | 0.499147483 | -0.3906  |
| GRN      | 0.496   | 0.6432  | 0.9605  | 0.23738414  | -0.3909  |
| CEBPA    | 0.1297  | -0.0725 | 0.4242  | 0.249775226 | -0.3956  |
| CHL1     | -4.6826 | -4.8561 | -4.3737 | 0.244346482 | -0.39565 |
| ALDH1A1  | -3.0412 | -3.3287 | -2.7893 | 0.269895727 | -0.39565 |
| LRG1     | -0.8168 | -0.8376 | -0.4315 | 0.228694097 | -0.3957  |
| CSF2RA   | -2.643  | -2.5012 | -2.1759 | 0.23948199  | -0.3962  |
| BRD3     | 0.4201  | 0.1745  | 0.6945  | 0.260132889 | -0.3972  |
| APCS     | -5.3722 | -4.8751 | -4.7262 | 0.338278884 | -0.39745 |
| CTSS     | -0.5283 | -0.2555 | 0.0058  | 0.267070634 | -0.3977  |
| MEP1B    | -3.4476 | -3.8847 | -3.2683 | 0.317057792 | -0.39785 |
| LYZL2    | -0.3124 | -0.6606 | -0.0881 | 0.288475874 | -0.3984  |
| LCAT     | -3.8075 | -4.1415 | -3.5738 | 0.285322911 | -0.4007  |

|             |         |          |         |             |          |
|-------------|---------|----------|---------|-------------|----------|
| RRP15       | -0.3858 | 0.5846   | 0.5011  | 0.537779388 | -0.4017  |
| PSMC3       | 0.0888  | 0.0223   | 0.4573  | 0.234321538 | -0.40175 |
| MAP1LC3A    | 0.9302  | 0.516    | 1.125   | 0.311017063 | -0.4019  |
| ITGB6       | -2.9225 | -3.8173  | -2.9678 | 0.5040452   | -0.4021  |
| CPA2        | -7.6629 | -8.2672  | -7.5617 | 0.381477431 | -0.40335 |
| RASGRF1     | 0.2081  | 0.3947   | 0.705   | 0.251003074 | -0.4036  |
| AGR2        | -1.846  | -2.4269  | -1.7318 | 0.372748901 | -0.40465 |
| SEMA6C      | -0.3826 | -0.902   | -0.2375 | 0.349378167 | -0.4048  |
| MEPE        | -9.386  | -10.5533 | -9.5628 | 0.629144628 | -0.40685 |
| SPESP1      | 0.0017  | -0.3448  | 0.2361  | 0.292247161 | -0.40765 |
| TGFBR3      | -4.4469 | -4.6305  | -4.1302 | 0.253083629 | -0.4085  |
| PO1-OID3023 | -5.9033 | -6.1877  | -5.6368 | 0.275498463 | -0.4087  |
| LY96        | -3.8076 | -3.2843  | -3.1367 | 0.352546796 | -0.40925 |
| PAFAH1B3    | 0.1137  | 0.2726   | 0.603   | 0.249608981 | -0.40985 |
| SH3GL3      | -0.9742 | -1.3163  | -0.7346 | 0.292351233 | -0.41065 |
| ITGAL       | -4.3156 | -4.4819  | -3.9859 | 0.252445961 | -0.41285 |
| FETUB       | -8.1528 | -7.4625  | -7.3947 | 0.419489082 | -0.41295 |
| SAG         | 0.2453  | -0.024   | 0.5236  | 0.273812326 | -0.41295 |
| LILRA3      | -4.8378 | -5.6382  | -4.824  | 0.466145943 | -0.414   |
| MYOM1       | 0.0369  | -1.1501  | -0.1426 | 0.639823609 | -0.414   |
| CEACAM21    | -2.7062 | -3.315   | -2.5965 | 0.387064547 | -0.4141  |
| APOH        | -1.3891 | -1.7939  | -1.1764 | 0.313690553 | -0.4151  |
| KLK13       | -4.4245 | -4.7378  | -4.1657 | 0.286482326 | -0.41545 |
| MAPRE3      | -0.5499 | -0.545   | -0.1301 | 0.24096959  | -0.41735 |
| DUSP29      | -0.541  | -0.8009  | -0.253  | 0.27407007  | -0.41795 |
| ISLR2       | -2.7002 | -3.9919  | -2.9275 | 0.689577351 | -0.41855 |
| FABP9       | -1.9526 | -1.9673  | -1.541  | 0.241992541 | -0.41895 |
| SLC39A5     | -3.2393 | -3.2466  | -2.8237 | 0.242081618 | -0.41925 |
| ANGPT2      | -7.2928 | -6.8971  | -6.675  | 0.312938689 | -0.41995 |
| CLEC4C      | -4.5706 | -4.82    | -4.2749 | 0.272877524 | -0.4204  |
| GALNT5      | -1.3922 | -1.6531  | -1.1018 | 0.275781514 | -0.42085 |
| HS6ST2      | -3.5595 | -3.756   | -3.2361 | 0.262518514 | -0.42165 |
| CLEC12A     | -0.656  | -0.6884  | -0.2485 | 0.245159139 | -0.4237  |
| ACVRL1      | -5.8202 | -6.4906  | -5.7309 | 0.415241845 | -0.4245  |
| PGLYRP4     | -1.1843 | -1.847   | -1.0898 | 0.412604205 | -0.42585 |
| OLR1        | -4.6292 | -4.7626  | -4.2694 | 0.255113648 | -0.4265  |
| LAYN        | -5.0678 | -5.2248  | -4.7164 | 0.260320802 | -0.4299  |
| CD8A        | -6.7765 | -6.8739  | -6.3945 | 0.25338874  | -0.4307  |
| CA12        | -8.9232 | -5.2069  | -6.6325 | 1.874856774 | -0.43255 |
| CXCL9       | -4.3418 | -4.3121  | -3.8941 | 0.250346886 | -0.43285 |
| SIGLEC6     | 1.7752  | 1.8055   | 2.2237  | 0.250653007 | -0.43335 |
| CXCL16      | 0.3292  | 0.3722   | 0.7854  | 0.25189339  | -0.4347  |
| TJP3        | -0.1093 | -0.5385  | 0.1115  | 0.330521124 | -0.4354  |
| SERPINB5    | -0.1473 | -1.2161  | -0.2424 | 0.591533197 | -0.4393  |
| DPP6        | -3.8102 | -3.7643  | -3.3479 | 0.254694935 | -0.43935 |
| ECI2        | -0.727  | -0.2655  | -0.0563 | 0.343167933 | -0.43995 |
| FCAR        | -4.0968 | -4.6473  | -3.9315 | 0.374776373 | -0.44055 |
| DEFB118     | -0.4579 | -0.5976  | -0.0858 | 0.26454796  | -0.44195 |
| KIRREL1     | -0.1446 | -0.1436  | 0.3015  | 0.257267766 | -0.4456  |
| SIGLEC15    | -0.1725 | -0.3729  | 0.1786  | 0.279160533 | -0.4513  |

|           |         |         |         |             |          |
|-----------|---------|---------|---------|-------------|----------|
| BPIFA2    | -4.9319 | -5.2132 | -4.6208 | 0.296324895 | -0.45175 |
| B3GNT7    | -6.8684 | -6.3198 | -6.1417 | 0.37876432  | -0.4524  |
| CD300LF   | -7.0053 | -7.3673 | -6.7282 | 0.320488487 | -0.4581  |
| LILRA2    | -4.801  | -4.5992 | -4.2415 | 0.283346896 | -0.4586  |
| MSTN      | -1.7051 | -1.729  | -1.2582 | 0.265186557 | -0.45885 |
| CCL11     | -8.3017 | -7.5272 | -7.4549 | 0.469423011 | -0.45955 |
| PAIP2B    | 0.7092  | 1.3226  | 1.4767  | 0.406009569 | -0.4608  |
| SLA2      | -1.4725 | -1.2126 | -0.8805 | 0.296732882 | -0.46205 |
| H2AP      | -1.1934 | -1.5258 | -0.8969 | 0.314620729 | -0.4627  |
| ACAN      | -4.1183 | -4.6692 | -3.9298 | 0.384216827 | -0.46395 |
| CEMIP2    | -2.2739 | -2.4415 | -1.8918 | 0.281738726 | -0.4659  |
| DMP1      | -7.2172 | -6.8008 | -6.5421 | 0.340605994 | -0.4669  |
| C1R       | -0.6233 | -0.65   | -0.1695 | 0.270039374 | -0.46715 |
| PARD3     | -2.8723 | -2.6994 | -2.3176 | 0.283830272 | -0.46825 |
| DAND5     | 2.1349  | 1.8127  | 2.4429  | 0.315126662 | -0.4691  |
| FGF20     | -0.6206 | -0.8986 | -0.2876 | 0.305912297 | -0.472   |
| IGDCC3    | -0.0232 | 0.1528  | 0.5368  | 0.286365734 | -0.472   |
| TPP1      | -2.151  | -2.0289 | -1.6172 | 0.279686652 | -0.47275 |
| APOA4     | -3.5897 | -3.1236 | -2.8832 | 0.359208301 | -0.47345 |
| ERCC1     | 0.4183  | -0.4439 | 0.4633  | 0.511277107 | -0.4761  |
| PDGFC     | -2.0933 | -2.1598 | -1.6502 | 0.277023471 | -0.47635 |
| BCL7A     | -0.6378 | -0.2517 | 0.0334  | 0.336864132 | -0.47815 |
| FH        | -0.7711 | 0.2596  | 0.2235  | 0.584932312 | -0.47925 |
| LAIR2     | -3.4581 | -4.18   | -3.3393 | 0.454977937 | -0.47975 |
| GPC1      | -5.2849 | -5.2525 | -4.7873 | 0.278408142 | -0.4814  |
| TNFRSF11B | -6.2623 | -6.2076 | -5.7531 | 0.27953741  | -0.48185 |
| PITHD1    | -0.8595 | -1.7162 | -0.8047 | 0.511170255 | -0.48315 |
| TNFRSF21  | -6.6252 | -7.2526 | -6.4557 | 0.419803649 | -0.4832  |
| CLU       | 0.5539  | 0.6693  | 1.0951  | 0.285049773 | -0.4835  |
| MIA       | -7.0536 | -7.9729 | -7.0297 | 0.537790222 | -0.48355 |
| LAMP3     | -8.941  | -9.7021 | -8.8377 | 0.472075464 | -0.48385 |
| DAPK2     | -1.5284 | -2.2434 | -1.4017 | 0.453823898 | -0.4842  |
| ATP6AP2   | -2.3827 | -2.4396 | -1.925  | 0.282117015 | -0.48615 |
| CR2       | -3.477  | -3.3951 | -2.9486 | 0.284393044 | -0.48745 |
| EIF2AK2   | -3.6952 | -4.0726 | -3.3955 | 0.339292219 | -0.4884  |
| GPR101    | -0.3781 | -0.3206 | 0.1397  | 0.283813078 | -0.48905 |
| ATP1B2    | 0.0598  | 0.1572  | 0.5977  | 0.286607577 | -0.4892  |
| QSOX1     | 6.6255  | 6.7014  | 7.1548  | 0.286208217 | -0.49135 |
| CPE       | -9.0844 | -7.0732 | -7.5861 | 1.045059387 | -0.4927  |
| NUBP1     | -1.4923 | -0.1504 | -0.3276 | 0.728997204 | -0.49375 |
| CYB5A     | -2.1076 | -0.1504 | -0.6338 | 1.019509183 | -0.4952  |
| ANKRA2    | 0.5333  | -0.354  | 0.5851  | 0.527872039 | -0.49545 |
| HTR1A     | -0.4086 | -0.2373 | 0.1776  | 0.3014178   | -0.50055 |
| PDXDC1    | 0.0192  | -0.3694 | 0.3261  | 0.348548854 | -0.5012  |
| CCL26     | -2.6867 | -2.0344 | -1.8589 | 0.436185813 | -0.50165 |
| NAGA      | -1.6722 | -1.138  | -0.9027 | 0.39430656  | -0.5024  |
| CNTN2     | -8.1417 | -8.5729 | -7.8536 | 0.362014627 | -0.5037  |
| DDX53     | -0.0357 | -0.6966 | 0.14    | 0.441127128 | -0.50615 |
| PBLD      | -1.1989 | -0.9667 | -0.5762 | 0.314685658 | -0.5066  |
| TNXB      | -5.7719 | -6.0346 | -5.3963 | 0.320809793 | -0.50695 |

|           |         |         |         |             |          |
|-----------|---------|---------|---------|-------------|----------|
| MYOC      | -4.2956 | -4.9981 | -4.139  | 0.457544646 | -0.50785 |
| PCDH17    | -2.8911 | -2.6737 | -2.272  | 0.314088751 | -0.5104  |
| ADCYAP1R1 | -3.4745 | -2.7589 | -2.6049 | 0.46404086  | -0.5118  |
| DGKZ      | 0.1315  | 0.0901  | 0.6231  | 0.296500006 | -0.5123  |
| CD84      | -4.6204 | -4.8079 | -4.2018 | 0.310306145 | -0.51235 |
| DUOX2     | -0.1819 | 0.279   | 0.5613  | 0.375159597 | -0.51275 |
| ATP1B4    | 0.5566  | -0.1186 | 0.7339  | 0.449830816 | -0.5149  |
| PLA2G1B   | -7.2963 | -6.9135 | -6.5898 | 0.353661745 | -0.5151  |
| FBLN2     | 5.0195  | 5.0209  | 5.5367  | 0.298202236 | -0.5165  |
| CDNF      | -2.6749 | -3.046  | -2.3422 | 0.352074552 | -0.51825 |
| CD300C    | -0.6106 | -0.4106 | 0.0103  | 0.316931544 | -0.5209  |
| TERF1     | 0.6401  | 0.5787  | 1.1332  | 0.303970344 | -0.5238  |
| EHD3      | -2.7714 | -3.7622 | -2.7425 | 0.580561214 | -0.5243  |
| PCSK9     | -5.1436 | -4.6102 | -4.3518 | 0.403780749 | -0.5251  |
| CSF3R     | -2.1789 | -2.4597 | -1.7937 | 0.334361003 | -0.5256  |
| MSMB      | -4.0373 | -3.261  | -3.1233 | 0.49278105  | -0.52585 |
| TMOD4     | -0.1781 | 0.7798  | 0.8272  | 0.567222364 | -0.52635 |
| STX16     | -2.3175 | -1.903  | -1.5833 | 0.368118636 | -0.52695 |
| AIF1      | -0.5273 | -0.9184 | -0.1938 | 0.362681362 | -0.52905 |
| LAMB1     | -4.5871 | -5.1682 | -4.3467 | 0.42236075  | -0.53095 |
| FAM3C     | -3.6566 | -3.652  | -3.1227 | 0.306928021 | -0.5316  |
| NXPE4     | -0.3951 | -0.5618 | 0.0537  | 0.318342211 | -0.53215 |
| PLAT      | 4.9607  | 5.0007  | 5.5136  | 0.30831932  | -0.5329  |
| TSLP      | -0.1804 | -0.4628 | 0.2113  | 0.338523623 | -0.5329  |
| TOP1MT    | -0.5604 | -0.152  | 0.1768  | 0.369315547 | -0.533   |
| GZMH      | -4.4866 | -4.5107 | -3.9654 | 0.308107757 | -0.53325 |
| CSF1R     | -7.4988 | -6.3709 | -6.4005 | 0.642818982 | -0.53435 |
| SLAMF8    | -2.4673 | -2.3405 | -1.8679 | 0.315887469 | -0.536   |
| APOM      | -7.4057 | -6.8087 | -6.5712 | 0.429962305 | -0.536   |
| EPHB6     | -5.7766 | -6.494  | -5.5986 | 0.474005612 | -0.5367  |
| CFHR2     | -3.294  | -3.244  | -2.7311 | 0.311561342 | -0.5379  |
| FKBP7     | -0.4887 | -1.5478 | -0.4781 | 0.614554481 | -0.54015 |
| ANG       | -5.1397 | -4.8681 | -4.4632 | 0.34043179  | -0.5407  |
| GP1BB     | -0.7931 | -1.5784 | -0.6447 | 0.50174933  | -0.54105 |
| EFCAB14   | -3.1756 | -3.0569 | -2.575  | 0.318076946 | -0.54125 |
| KYNU      | -9.259  | -8.3276 | -8.2509 | 0.5611973   | -0.5424  |
| MINDY1    | -1.6562 | -2.1239 | -1.3467 | 0.391274281 | -0.54335 |
| PROS1     | 0.5208  | 0.5664  | 1.089   | 0.315711197 | -0.5454  |
| CEBPB     | 0.101   | -0.2516 | 0.4707  | 0.361183734 | -0.546   |
| FABP4     | -5.918  | -5.5512 | -5.1878 | 0.365101319 | -0.5468  |
| CDON      | -6.3271 | -6.066  | -5.6474 | 0.342877835 | -0.54915 |
| APOF      | -7.914  | -8.9415 | -7.8772 | 0.604130916 | -0.55055 |
| ARHGAP1   | -0.9528 | -0.2396 | -0.0447 | 0.478066568 | -0.5515  |
| ECSCR     | -1.2945 | -1.5997 | -0.8951 | 0.353347931 | -0.552   |
| VIT       | -5.3191 | -5.2636 | -4.735  | 0.322405288 | -0.55635 |
| TPPP3     | -0.3058 | -0.9915 | -0.0902 | 0.470639554 | -0.55845 |
| THPO      | -5.7356 | -5.8265 | -5.2225 | 0.325666092 | -0.55855 |
| CLEC1A    | -4.1319 | -4.7064 | -3.8602 | 0.432035026 | -0.55895 |
| PLB1      | -3.0571 | -3.4193 | -2.6777 | 0.370833242 | -0.5605  |
| SMPDL3B   | -0.8173 | -1.4    | -0.545  | 0.436789724 | -0.56365 |

|             |         |         |         |             |          |
|-------------|---------|---------|---------|-------------|----------|
| GLB1        | -3.6973 | -4.0136 | -3.2915 | 0.361973236 | -0.56395 |
| IL1RL1      | 4.5292  | 4.601   | 5.1297  | 0.327942876 | -0.5646  |
| ELAVL4      | 0.5237  | 1.4186  | 1.536   | 0.553681626 | -0.56485 |
| SESTD1      | 0.2543  | -1.0403 | 0.1784  | 0.726519059 | -0.5714  |
| CLEC14A     | -3.5368 | -4.3913 | -3.3925 | 0.539844759 | -0.57155 |
| CD28        | -3.1154 | -3.1625 | -2.5662 | 0.331514892 | -0.57275 |
| TDGF1       | -3.3107 | -4.6395 | -3.4001 | 0.742721814 | -0.575   |
| KIRREL2     | 1.4111  | 1.0649  | 1.8133  | 0.374549027 | -0.5753  |
| B4GAT1      | -4.9124 | -4.5801 | -4.1703 | 0.371723854 | -0.57595 |
| FURIN       | -0.6882 | -0.6519 | -0.0919 | 0.334288144 | -0.57815 |
| DUSP3       | -5.5468 | -5.6357 | -5.0125 | 0.337085039 | -0.57875 |
| PPM1B       | -0.6379 | -0.4694 | 0.0258  | 0.344991058 | -0.57945 |
| VSTM1       | -3.4005 | -4.0122 | -3.1266 | 0.453410311 | -0.57975 |
| CXCL6       | -9.907  | -8.2507 | -8.4959 | 0.893929149 | -0.58295 |
| WAS         | -0.4536 | -0.3288 | 0.1946  | 0.34392001  | -0.5858  |
| KHDC3L      | -0.9211 | -0.8894 | -0.3193 | 0.33866949  | -0.58595 |
| CD177       | -5.4192 | -5.1409 | -4.6917 | 0.367080323 | -0.58835 |
| BGN         | -7.9429 | -8.4567 | -7.6094 | 0.426835249 | -0.5904  |
| TPM3        | -0.1328 | -0.3814 | 0.3383  | 0.365537335 | -0.5954  |
| PKN3        | -2.3478 | -1.5035 | -1.3302 | 0.544424029 | -0.59545 |
| RAB3GAP1    | -0.3387 | -0.7984 | 0.0271  | 0.41363913  | -0.59565 |
| C4BPB       | -6.2259 | -5.7854 | -5.409  | 0.408868932 | -0.59665 |
| REST        | -0.295  | -0.1492 | 0.3759  | 0.352867884 | -0.598   |
| PTX3        | -7.654  | -6.368  | -6.4065 | 0.731611748 | -0.6045  |
| CDH4        | -0.8407 | -0.2093 | 0.0827  | 0.4719812   | -0.6077  |
| BOLA1       | -1.2098 | -1.1122 | -0.552  | 0.354976675 | -0.609   |
| ST8SIA1     | -0.5822 | -0.4551 | 0.0928  | 0.358695279 | -0.61145 |
| TMED10      | -0.2357 | -1.1081 | -0.0601 | 0.561281439 | -0.6118  |
| FCRL6       | -5.3493 | -5.5314 | -4.8219 | 0.368488222 | -0.61845 |
| PO1-01D3056 | -5.9293 | -6.0737 | -5.377  | 0.367713099 | -0.6245  |
| BLOC1S2     | 0.2216  | 0.2388  | 0.8587  | 0.362966541 | -0.6285  |
| ADAM23      | -7.384  | -7.2545 | -6.6888 | 0.369704788 | -0.63045 |
| FOLR2       | -8.8771 | -9.9244 | -8.7699 | 0.637860928 | -0.63085 |
| CCN4        | -6.1232 | -6.5222 | -5.6899 | 0.416267778 | -0.6328  |
| VCAN        | -3.7315 | -4.0546 | -3.2577 | 0.400817843 | -0.63535 |
| NOP56       | -1.5348 | -1.2333 | -0.743  | 0.399633912 | -0.64105 |
| RBP5        | -8.3768 | -7.011  | -7.0521 | 0.776952266 | -0.6418  |
| PCARE       | -1.9226 | -1.4895 | -1.0626 | 0.430003725 | -0.64345 |
| PTK7        | -0.8287 | -2.2148 | -0.8732 | 0.78773346  | -0.64855 |
| IL17D       | -2.9363 | -3.1162 | -2.3761 | 0.385991377 | -0.65015 |
| HEBP1       | -0.2693 | 0.2403  | 0.6386  | 0.455085607 | -0.6531  |
| VSTM2L      | -1.0573 | 0.1953  | 0.2231  | 0.73134622  | -0.6541  |
| BMP6        | -3.42   | -3.9301 | -3.0208 | 0.455775738 | -0.65425 |
| STXBP1      | -0.2412 | -0.8422 | 0.1131  | 0.482929874 | -0.6548  |
| TNNI3       | 7.5757  | 7.3087  | 8.0978  | 0.401363555 | -0.6556  |
| ST6GAL1     | -0.4844 | -0.3373 | 0.2495  | 0.388282942 | -0.66035 |
| CSF3        | -3.8323 | -2.811  | -2.6598 | 0.637791944 | -0.66185 |
| B4GALT1     | -4.5788 | -4.1833 | -3.7182 | 0.430768813 | -0.66285 |
| CELA3A      | -7.0014 | -7.1921 | -6.4293 | 0.396973706 | -0.66745 |
| CASP4       | -4.3018 | -4.0994 | -3.5331 | 0.398447224 | -0.6675  |

|            |         |          |         |             |          |
|------------|---------|----------|---------|-------------|----------|
| SPINK5     | -5.5851 | -4.7829  | -4.5093 | 0.559125424 | -0.6747  |
| GIPR       | -1.1366 | -0.1446  | 0.0349  | 0.630964407 | -0.6755  |
| CD4        | -6.6853 | -6.3748  | -5.8535 | 0.42032828  | -0.67655 |
| CTSB       | -2.0189 | -1.9088  | -1.2819 | 0.3975539   | -0.68195 |
| ICAM5      | -1.9514 | -1.6779  | -1.1326 | 0.416850849 | -0.68205 |
| PTPRM      | -5.2444 | -5.9118  | -4.8897 | 0.518961023 | -0.6884  |
| NUCB2      | -3.0358 | -2.7041  | -2.1798 | 0.431596142 | -0.69015 |
| TNFRSF12A  | -1.5263 | -1.5313  | -0.8386 | 0.398494998 | -0.6902  |
| GFRAL      | -4.9381 | -3.4937  | -3.5244 | 0.825205181 | -0.6915  |
| KLRK1      | -5.3953 | -4.0135  | -4.0074 | 0.799549338 | -0.697   |
| CANT1      | -1.7639 | -1.7252  | -1.0453 | 0.404175634 | -0.69925 |
| MENT       | -7.7915 | -7.4067  | -6.8991 | 0.447605958 | -0.7     |
| PRRT3      | -5.8917 | -6.3565  | -5.4222 | 0.46715197  | -0.7019  |
| HBEGF      | -7.9884 | -7.2833  | -6.9337 | 0.537242692 | -0.70215 |
| CEACAM1    | -8.016  | -10.4305 | -8.5211 | 1.273495493 | -0.70215 |
| NF-OID2007 | 1.5428  | 1.3619   | 2.1588  | 0.417777935 | -0.70645 |
| CDHR1      | -2.1866 | -2.1188  | -1.4457 | 0.409591923 | -0.707   |
| MPRIP      | -3.4773 | -3.6945  | -2.8779 | 0.422944394 | -0.708   |
| ART5       | -0.6338 | -0.2422  | 0.2701  | 0.453291124 | -0.7081  |
| UROS       | -1.0608 | -1.6361  | -0.6384 | 0.500798885 | -0.71005 |
| MAGEA3     | 0.5337  | 0.2868   | 1.1223  | 0.429237661 | -0.71205 |
| CCL18      | -4.1284 | -4.2167  | -3.4533 | 0.417599581 | -0.71925 |
| CDH15      | -2.5273 | -3.119   | -2.1007 | 0.511375814 | -0.72245 |
| GPC5       | -5.455  | -5.3167  | -4.6631 | 0.422970736 | -0.72275 |
| CCL23      | -4.1872 | -3.9798  | -3.3607 | 0.430000353 | -0.7228  |
| PALLD      | -0.3701 | -0.4325  | 0.3218  | 0.418646203 | -0.7231  |
| LSP1       | -4.1623 | -4.3245  | -3.5197 | 0.425626331 | -0.7237  |
| DNLZ       | -3.4587 | -3.2468  | -2.6278 | 0.431751746 | -0.72495 |
| MERTK      | -9.4666 | -6.6094  | -7.311  | 1.488984316 | -0.727   |
| RSPO1      | -3.7559 | -4.4045  | -3.35   | 0.531884546 | -0.7302  |
| OD1-OID302 | -2.8816 | -3.5141  | -2.4676 | 0.527038028 | -0.73025 |
| AGRP       | -6.3301 | -6.3455  | -5.6074 | 0.42176693  | -0.7304  |
| APLP1      | -4.9849 | -4.5948  | -4.0516 | 0.468738225 | -0.73825 |
| ICA1       | -1.7404 | -1.877   | -1.0703 | 0.431751947 | -0.7384  |
| CTSZ       | 2.2454  | 2.3501   | 3.0377  | 0.430405843 | -0.73995 |
| SNED1      | -4.6165 | -5.4063  | -4.2664 | 0.583912959 | -0.745   |
| MTSS2      | -1.0769 | -1.6814  | -0.6309 | 0.527239114 | -0.74825 |
| FGF7       | -2.2822 | -2.3558  | -1.5707 | 0.433595668 | -0.7483  |
| IL5RA      | -2.7337 | -2.2058  | -1.7179 | 0.508031242 | -0.75185 |
| IL31       | -1.488  | -0.9672  | -0.474  | 0.5070626   | -0.7536  |
| B3_CGB5_CG | 8.1797  | 8.1952   | 8.9412  | 0.435246769 | -0.75375 |
| VSIG10L    | -1.4409 | -0.9165  | -0.4222 | 0.509424109 | -0.7565  |
| ENTPD5     | -2.3087 | -2.3021  | -1.5464 | 0.43822128  | -0.759   |
| NF-OID2123 | 2.1695  | 2.5682   | 3.1279  | 0.481448568 | -0.75905 |
| GP5        | -6.5784 | -6.6114  | -5.8355 | 0.43875016  | -0.7594  |
| FKBP14     | -1.2282 | -0.3413  | -0.0249 | 0.62378301  | -0.75985 |
| KAZALD1    | -3.9805 | -4.3551  | -3.4051 | 0.478523827 | -0.7627  |
| PGA4       | 0.4678  | 0.401    | 1.1983  | 0.442300761 | -0.7639  |
| CXCL3      | -5.7797 | -5.5971  | -4.9241 | 0.450614972 | -0.7643  |
| SPARC      | -4.71   | -2.9354  | -3.0562 | 0.991535194 | -0.7665  |



|             |          |         |         |             |          |
|-------------|----------|---------|---------|-------------|----------|
| LRR37A2     | -4.6446  | -5.0121 | -4.0618 | 0.479197625 | -0.76655 |
| CBLN1       | -0.3743  | -0.7043 | 0.2274  | 0.472406566 | -0.7667  |
| INPP5J      | -3.2246  | -3.6066 | -2.6442 | 0.484596382 | -0.7714  |
| CSNK1D      | 0.067    | -0.3985 | 0.6061  | 0.502749146 | -0.77185 |
| TNFRSF13C   | -3.0914  | -3.6187 | -2.5831 | 0.517829048 | -0.77195 |
| KEL         | -3.6931  | -3.3384 | -2.7413 | 0.481016933 | -0.77445 |
| BEX3        | -0.4878  | -0.3768 | 0.3437  | 0.451448317 | -0.776   |
| GIMAP8      | -1.5174  | -2.0227 | -0.994  | 0.514376538 | -0.77605 |
| AGRN        | -1.0937  | -0.9252 | -0.2327 | 0.456302075 | -0.77675 |
| TET2        | -1.23    | -0.5076 | -0.0909 | 0.576346172 | -0.7779  |
| CELSR2      | -4.6495  | -4.6422 | -3.8629 | 0.452051129 | -0.78295 |
| IGDCC4      | -5.1796  | -4.8352 | -4.2189 | 0.48672058  | -0.7885  |
| PO1-OID3105 | -5.2495  | -5.0364 | -4.3539 | 0.467852758 | -0.78905 |
| PLXDC1      | -3.8945  | -3.6119 | -2.9638 | 0.477161548 | -0.7894  |
| SYTL4       | 0.1993   | -0.1507 | 0.8138  | 0.48825719  | -0.7895  |
| CHGB        | -4.9763  | -5.3721 | -4.3808 | 0.498991246 | -0.7934  |
| IL1R2       | -10.2345 | -9.8879 | -9.2656 | 0.490943999 | -0.7956  |
| BRDT        | 0.2808   | 0.0657  | 0.9697  | 0.47224062  | -0.79645 |
| DIPK2B      | -5.4056  | -4.9717 | -4.3844 | 0.512516657 | -0.80425 |
| KLRC1       | -0.5749  | -0.4176 | 0.3106  | 0.47242791  | -0.80685 |
| SEMA3G      | -3.648   | -3.4029 | -2.7185 | 0.48174122  | -0.80695 |
| OSM         | 5.5663   | 5.779   | 6.4797  | 0.477933283 | -0.80705 |
| GDNF        | -1.5246  | -2.4582 | -1.1832 | 0.660023727 | -0.8082  |
| DOCK9       | -0.6619  | -0.8108 | 0.0739  | 0.473685363 | -0.81025 |
| CLEC11A     | 4.8314   | 4.8997  | 5.6813  | 0.472209957 | -0.81575 |
| ADAM12      | -2.404   | -2.452  | -1.612  | 0.471728736 | -0.816   |
| LECT2       | -8.6247  | -8.8259 | -7.9083 | 0.482303528 | -0.817   |
| TRIM58      | -1.3366  | -1.7408 | -0.7204 | 0.513857347 | -0.8183  |
| BLNK        | -2.3548  | -1.6221 | -1.1654 | 0.600013408 | -0.82305 |
| CPVL        | -7.9252  | -9.0242 | -7.6481 | 0.727809112 | -0.8266  |
| CCDC134     | -0.863   | -0.1913 | 0.3012  | 0.584394099 | -0.82835 |
| PF4         | -3.6346  | -1.8381 | -1.9067 | 1.017984661 | -0.82965 |
| PGF         | -2.108   | -2.0685 | -1.256  | 0.480905483 | -0.83225 |
| SIGLEC5     | 1.2923   | 1.2786  | 2.1195  | 0.481587711 | -0.83405 |
| RELT        | 3.3403   | 3.3832  | 4.1971  | 0.48276631  | -0.83535 |
| NF-OID2047  | 2.9307   | 3.3163  | 3.9594  | 0.519693605 | -0.8359  |
| ADIPOQ      | -3.6287  | -3.1988 | -2.5767 | 0.528918144 | -0.83705 |
| PRG3        | 1.605    | 1.585   | 2.4329  | 0.483865136 | -0.8379  |
| TSPAN15     | 0.6404   | -0.0998 | 1.1175  | 0.613370435 | -0.8472  |
| TIMP3       | 1.9146   | 2.0943  | 2.853   | 0.49808171  | -0.84855 |
| CACNB1      | 0.0008   | -0.1001 | 0.8011  | 0.493764846 | -0.85075 |
| RNF149      | -4.0598  | -3.4309 | -2.8944 | 0.583310183 | -0.85095 |
| KLRF1       | -2.6287  | -3.196  | -2.0588 | 0.568600495 | -0.85355 |
| ECM1        | 2.9047   | 4.1694  | 4.3942  | 0.802974821 | -0.85715 |
| MARCO       | -5.0533  | -5.3429 | -4.3378 | 0.517370663 | -0.8603  |
| GRIN2B      | -0.98    | -1.2797 | -0.2611 | 0.523479267 | -0.86875 |
| ADGRF5      | -4.8024  | -3.6966 | -3.3768 | 0.748042004 | -0.8727  |
| PSAPL1      | -5.8653  | -5.1853 | -4.6523 | 0.60798273  | -0.873   |
| PCOLCE      | -0.4989  | -0.2607 | 0.494   | 0.518356656 | -0.8738  |
| GM2A        | 4.6323   | 4.6183  | 5.5011  | 0.505691817 | -0.8758  |

|            |         |         |         |             |          |
|------------|---------|---------|---------|-------------|----------|
| SELL       | 1.8178  | 2.3021  | 2.9449  | 0.565404389 | -0.88495 |
| PAPPA      | -5.0711 | -3.5763 | -3.4385 | 0.90542795  | -0.8852  |
| TMPRSS11B  | -0.3123 | -0.9841 | 0.2391  | 0.612586788 | -0.8873  |
| FRMD4B     | 0.3767  | -0.6072 | 0.7785  | 0.712936058 | -0.89375 |
| ADM        | -8.4621 | -8.7309 | -7.6965 | 0.536715344 | -0.9     |
| SHC1       | -1.2824 | -1.4699 | -0.4736 | 0.529453709 | -0.90255 |
| PTP4A3     | -3.1607 | -2.5874 | -1.9641 | 0.598474079 | -0.90995 |
| KIR2DS4    | -5.476  | -4.5969 | -4.121  | 0.687425465 | -0.91545 |
| DKK4       | -6.9094 | -7.0294 | -6.0523 | 0.532876599 | -0.9171  |
| ADAM9      | -3.2797 | -3.2761 | -2.3593 | 0.530357012 | -0.9186  |
| VMO1       | -2.6496 | -4.9627 | -2.8803 | 1.274103859 | -0.92585 |
| EBI3_IL27  | -9.1458 | -7.213  | -7.2429 | 1.107372134 | -0.9365  |
| PAM        | -3.2932 | -3.1666 | -2.2913 | 0.545585505 | -0.9386  |
| NF-OID2084 | 2.8231  | 2.7009  | 3.7023  | 0.546309961 | -0.9403  |
| LIF        | 7.8162  | 7.6964  | 8.7077  | 0.552547431 | -0.9514  |
| MYH7B      | -0.74   | -0.6589 | 0.2536  | 0.551735809 | -0.95305 |
| CSH1       | 0.3734  | 0.1286  | 1.2051  | 0.564284825 | -0.9541  |
| CA5A       | -3.0902 | -2.8652 | -2.0201 | 0.56420047  | -0.9576  |
| MYBPC1     | -3.2712 | -3.3741 | -2.3612 | 0.557472693 | -0.96145 |
| TPSG1      | 0.1443  | 0.3123  | 1.1928  | 0.563154286 | -0.9645  |
| GLA        | -0.8769 | -0.6586 | 0.202   | 0.570425639 | -0.96975 |
| DLL1       | -4.1705 | -4.1889 | -3.1992 | 0.566166692 | -0.9805  |
| FST        | 3.6049  | 3.6918  | 4.6324  | 0.569800582 | -0.98405 |
| PODXL2     | -0.6527 | -0.7466 | 0.2927  | 0.574854019 | -0.99235 |
| GGA1       | -1.2368 | -1.5802 | -0.4138 | 0.599408253 | -0.9947  |
| BOC        | -5.6    | -4.5628 | -4.084  | 0.774950459 | -0.9974  |
| TCL1B      | 0.4592  | -0.22   | 1.1173  | 0.668677743 | -0.9977  |
| SPINK4     | -0.4755 | -0.5187 | 0.5033  | 0.577984959 | -1.0004  |
| CD160      | -7.3316 | -8.3987 | -6.8433 | 0.795446254 | -1.02185 |
| SHISA5     | 3.738   | 3.711   | 4.7465  | 0.59020639  | -1.022   |
| VEGFA      | -1.7283 | -1.6003 | -0.632  | 0.599425083 | -1.0323  |
| ADAMTSL5   | -2.4684 | -3.0541 | -1.71   | 0.673896612 | -1.05125 |
| SPP1       | -4.0135 | -3.8571 | -2.8818 | 0.613244913 | -1.0535  |
| ADAMTS8    | -3.1042 | -3.1954 | -2.0884 | 0.61449384  | -1.0614  |
| CTSV       | -3.619  | -4.1074 | -2.7944 | 0.66363503  | -1.0688  |
| CHP1       | -0.5653 | 0.2506  | 0.9121  | 0.740043447 | -1.06945 |
| IGFBP7     | -0.4632 | -0.4924 | 0.5919  | 0.617764132 | -1.0697  |
| IL10       | -6.9437 | -4.4778 | -4.6362 | 1.380236068 | -1.07455 |
| MANEAL     | -2.8207 | -1.3116 | -0.9916 | 0.976847789 | -1.07455 |
| HGF        | -8.7509 | -8.6253 | -7.5999 | 0.6314034   | -1.0882  |
| WASF3      | -1.8088 | 1.0905  | 0.732   | 1.580618412 | -1.09115 |
| GHRHR      | -0.5857 | -0.6542 | 0.4894  | 0.641398631 | -1.10935 |
| CXCL12     | -2.3883 | -4.7147 | -2.4324 | 1.330599806 | -1.1191  |
| FGFBP3     | -2.9819 | -2.9041 | -1.8182 | 0.650567616 | -1.1248  |
| TREML2     | -7.243  | -6.9455 | -5.9631 | 0.669795991 | -1.13115 |
| KIR2DL3    | -3.6964 | -3.9025 | -2.6359 | 0.67963385  | -1.16355 |
| NTRK3      | -6.5832 | -6.3069 | -5.2805 | 0.686399536 | -1.16455 |
| AIDA       | -0.3064 | -0.718  | 0.7053  | 0.732431378 | -1.2175  |
| HS3ST3B1   | -3.1666 | -2.8543 | -1.791  | 0.721158043 | -1.21945 |
| GKN1       | -1.972  | -2.9386 | -1.2241 | 0.85957162  | -1.2312  |

|            |          |          |         |             |          |
|------------|----------|----------|---------|-------------|----------|
| SCARA5     | -10.1203 | -11.8945 | -9.7757 | 1.136943874 | -1.2317  |
| ALS7_LGALS | -5.9446  | -5.7026  | -4.5898 | 0.722538451 | -1.2338  |
| GPIHBP1    | -7.7766  | -2.4587  | -3.8587 | 2.756507477 | -1.25895 |
| CRISP2     | -10.078  | -7.6027  | -7.5572 | 1.442429258 | -1.28315 |
| CASP9      | -0.8659  | -0.0963  | 0.8119  | 0.839853582 | -1.293   |
| IL15       | -4.632   | -5.2269  | -3.6303 | 0.806891201 | -1.29915 |
| CRH        | -5.3269  | -5.6523  | -4.1893 | 0.768156659 | -1.3003  |
| C2         | -9.355   | -12.9559 | -9.8544 | 1.950862349 | -1.30105 |
| S100A12    | -8.8994  | -7.3071  | -6.7607 | 1.1111563   | -1.34255 |
| MN1        | 0.4271   | -1.1212  | 0.998   | 1.096522407 | -1.34505 |
| GALNT7     | -4.5929  | -6.8774  | -4.3674 | 1.388637852 | -1.36775 |
| CD34       | -5.1591  | -6.5209  | -4.4676 | 1.044725832 | -1.3724  |
| IGFBPL1    | 1.1815   | 1.2232   | 2.5827  | 0.79721814  | -1.38035 |
| CXCL11     | -3.6833  | -3.7837  | -2.3455 | 0.802932982 | -1.388   |
| CEACAM5    | -4.3257  | -3.9651  | -2.7359 | 0.833509552 | -1.4095  |
| MSLN       | -6.7745  | -6.0582  | -5.0057 | 0.889709258 | -1.41065 |
| CCL8       | -10.3711 | -10.3029 | -8.9197 | 0.81898875  | -1.4173  |
| GHRL       | -6.8753  | -6.5007  | -5.2123 | 0.872340599 | -1.4757  |
| EGFL7      | 0.3173   | 0.6746   | 1.9798  | 0.875130141 | -1.48385 |
| KCNIP4     | -0.1736  | -2.0704  | 0.4018  | 1.293619486 | -1.5238  |
| AKR1C4     | -1.9422  | -1.3119  | -0.0901 | 0.941660567 | -1.53695 |
| GALNT10    | -3.9505  | -6.9969  | -3.9316 | 1.764321128 | -1.5421  |
| LEFTY2     | -12.6067 | -8.7056  | -9.0192 | 2.167451746 | -1.63695 |
| PLXNA4     | -7.7256  | -4.8733  | -4.6535 | 1.713754443 | -1.64595 |
| CXCL10     | -5.2619  | -5.0898  | -3.5069 | 0.967403382 | -1.66895 |
| GPA33      | -10.4304 | -6.9943  | -7.0402 | 1.970716708 | -1.67215 |
| PSPN       | -6.0625  | -4.3477  | -3.5123 | 1.300125138 | -1.6928  |
| FCRL2      | -12.1643 | -8.6149  | -8.6861 | 2.029005711 | -1.7035  |
| WIF1       | -8.7443  | -11.4726 | -8.4006 | 1.683198076 | -1.70785 |
| TRIM40     | -1.7566  | -1.2124  | 0.2871  | 1.058407891 | -1.7716  |
| TNFRSF19   | -4.358   | -4.4658  | -2.5174 | 1.095117327 | -1.8945  |
| PNLIPRP1   | -11.2661 | -5.8402  | -6.6317 | 2.930998875 | -1.92145 |
| HS6ST1     | -4.6672  | -3.8917  | -2.2734 | 1.221377199 | -2.00605 |
| CBLIF      | -8.1986  | -10.3476 | -7.2538 | 1.585478187 | -2.0193  |
| GPR37      | -7.1626  | -5.9354  | -4.4602 | 1.353095257 | -2.0888  |
| UPB1       | -2.4965  | -9.1222  | -3.6298 | 3.543790982 | -2.17955 |
| SCN4B      | -7.1043  | -10.9731 | -6.785  | 2.331299621 | -2.2537  |
| CD5        | -9.4266  | -9.2804  | -7.0564 | 1.32824436  | -2.2971  |
| KIR3DL1    | -9.6159  | -6.4588  | -5.6194 | 2.107284391 | -2.41795 |
| CD7        | -5.6127  | -4.8767  | -2.7385 | 1.493018245 | -2.5062  |
| APOA2      | -5.9514  | -7.6163  | -3.7812 | 1.923090051 | -3.00265 |
| CCL25      | -12.3593 | -9.7029  | -7.9829 | 2.204833248 | -3.0482  |
| CLEC4A     | -11.5762 | -7.1834  | -5.5926 | 3.099215101 | -3.7872  |
| MUC16      | -8.1825  | -4.6468  | -1.9178 | 3.140994577 | -4.49685 |
| COL24A1    | -7.8525  | -7.994   | -3.1045 | 2.783006064 | -4.81875 |
