# Supplementary material for: BAG6 restricts pancreatic cancer progression by suppressing the release of IL33-presenting extracellular vesicles and the activation of mast cells
Source: PubMed Central journal article supplement (PMC11291976; doi:10.1038/s41423-024-01195-1), 2024-06-28
Supplement: 41423_2024_1195_MOESM13_ESM.pdf [file 41423_2024_1195_MOESM13_ESM.pdf]

**Supplementary table S4: Antibodies used in this study.**

| <b>Antibody name</b>                                              | <b>Supplier</b>                 | <b>Cat Number</b>   | <b>Clone</b>      |
|-------------------------------------------------------------------|---------------------------------|---------------------|-------------------|
| mouse monoclonal anti-beta-Actin antibody                         | Sigma-Aldrich                   | A1978               | AC-15             |
| Anti BAG6 antibody (3E4) Mouse and Human                          | Self-made                       |                     |                   |
| mouse monoclonal anti-CD4 antibody                                | Dako                            | M7310               | 4B12              |
| mouse monoclonal anti-CD8 antibody                                | Dako                            | M7103               | C8/144B           |
| mouse monoclonal anti-CD56 antibody                               | Dako                            | M7304               | 123C3             |
| mouse monoclonal anti-Alpha SMA                                   | Progen                          | 61001               | 1A4/ASM-1         |
| polyclonal Goat-anti-mouse anti-GFP antibody                      | Rockland                        | 600-101.215         | polyclonal        |
| monoclonal mouse anti-TSG101 antibody                             | Abcam                           | ab83                | 4A10              |
| Mouse monoclonal Alix antibody                                    | Santa Cruz                      | SC-53540            | 1A12              |
| Purified Mouse Anti-Flotillin-1                                   | BD Trans. Laboratories™         | 610821              | 18                |
| monoclonal rabbit anti-Cd63 antibody                              | Abcam                           | ab217345            | EPR21151          |
| monoclonal mouse anti-Hsp70/72 antibody                           | Enzo Lifesciences               | ADI-SPA-810F        | C92F3A-5          |
| Purified anti-mouse Cd9 Antibody                                  | Biologend                       | 124802              | MZ3               |
| polyclonal rabbit anti-Histone H2A antibody                       | Cell Signaling                  | 2578                | polyclonal        |
| Rabbit polyclonal anti-CD117 antibody                             | Dako                            | A4502               | polyclonal        |
| Rabbit anti-gapdh HRP (D16H11)                                    | Cell signaling                  | 8884                |                   |
| Goat anti-rabbit IgG, HRP-conjugated                              | Cell Signaling                  | 7074S               |                   |
| Horse anti-mouse IgG, HRP-conjugated                              | Cell Signaling                  | 7076S               |                   |
| F(ab') <sub>2</sub> -Rabbit anti-Goat IgG (H+L), Alexa Fluor™ 488 | Thermo Fisher                   | A-21222             | polyclonal        |
| Anti-IL-33 polyclonal antibody                                    | Thermo Fisher                   | PA5-96929           | polyclonal        |
| Anti-PDGF antibody, neutralizing                                  | Merck KGaA                      | 06-127              | polyclonal        |
| Purified anti-human Ki-67 Antibody                                | Biologend                       | 398502              | W17211A           |
| Chicken anti-Rat IgG (H+L), Alexa Fluor™ 647                      | Thermo Fisher                   | A-21472             | Polyclonal        |
| Hoechst 33342 Lösung (Nucleus staining)                           | Thermo Fisher                   | 62249               |                   |
| Actin-Alexa Fluor™ 546 Phalloidin                                 | Thermo Fisher                   | A22283              |                   |
| <b>ST2 Polyclonal Antibody</b>                                    | <b>Thermo Fisher</b>            | <b>PA5-20077</b>    | <b>Polyclonal</b> |
| <b>Goat anti-Mouse IgG (H + L)</b>                                | <b>Neta Scientific (LI-COR)</b> | <b>IRDye® 680RD</b> | <b>Polyclonal</b> |
| <b>Rabbit Polyclonal Calnexin antibody</b>                        | <b>Abcam</b>                    | <b>ab22595</b>      | <b>Polyclonal</b> |
| <b>Mouse IL-33 Antibody</b>                                       | <b>R&amp;D Systems</b>          | <b>AF3626-SP</b>    | <b>Polyclonal</b> |
| <b>Antibody name (single-cell sequencing)</b>                     |                                 |                     |                   |
| Anti-mouse Cd4 antibody                                           | Becton Dickinson                | 940108              | RM4-5             |
| Anti-mouse Cd279 antibody                                         | Becton Dickinson                | 940128              | J43               |
| Anti-mouse NK-1.1 antibody                                        | Becton Dickinson                | 940121              | PK136             |
| Anti-mouse Cd69 antibody                                          | Becton Dickinson                | 940126              | H1.2F3            |
| Anti-mouse Cd8b antibody                                          | Becton Dickinson                | 940181              | 53-5.8            |
| Anti-mouse Cd11b antibody                                         | Becton Dickinson                | 940008              | M1/70             |
| Anti-mouse Cd335 antibody                                         | Becton Dickinson                | 940140              | 29A1.4            |
| Anti-mouse Cd274 antibody                                         | Becton Dickinson                | 940142              | MIH5              |
| Anti-mouse Cd45R antibody                                         | Becton Dickinson                | 940110              | RA3-6B2           |
| Anti-mouse Cd45 antibody                                          | Becton Dickinson                | 940320              | 30-F11            |
