# Supplementary material for: BAG6 restricts pancreatic cancer progression by suppressing the release of IL33-presenting extracellular vesicles and the activation of mast cells
Source: PubMed Central journal article supplement (PMC11291976; doi:10.1038/s41423-024-01195-1), 2024-06-28
Supplement: 41423_2024_1195_MOESM14_ESM.pdf [file 41423_2024_1195_MOESM14_ESM.pdf]

**Supplementary table S5: List of customized gene panel for single cell sequencing.**

| Gene    | Transcript_id         | PolyA_location      | avg_(%) | max_(%) | Prod.length |
|---------|-----------------------|---------------------|---------|---------|-------------|
| Abcc9   | ENSMUST00000087527.10 | chr6(-): 142589133  | 100     | 100     | 478         |
| Ackr1   | ENSMUST00000038227.5  | chr1(-): 173331890  | 100     | 100     | 511         |
| Acod1   | ENSMUST00000022722.6  | chr14(+): 103056573 |         |         | 344         |
| Acsbg1  | ENSMUST00000034822.11 | chr9(-): 54604891   | 96,4    | 100     | 556         |
| Acta2   | ENSMUST00000039631.9  | chr19(-): 34241525  | 85,2    | 100     | 353         |
| Bcam    | ENSMUST00000003061.13 | chr7(-): 19756140   | 100     | 100     | 362         |
| Bcat1   | ENSMUST00000111742.7  | chr6(-): 144999156  | 100     | 100     | 545         |
| Car6    | ENSMUST00000030817.4  | chr4(-): 150187015  |         |         | 548         |
| Cav1    | ENSMUST00000007799.12 | chr6(+): 17341297   | 99,5    | 100     | 531         |
| Ccl7    | ENSMUST00000021011.2  | chr11(+): 82047520  | 100     | 100     | 516         |
| Ccn3    | ENSMUST00000050027.8  | chr15(+): 54753533  | 53,3    | 100     | 399         |
| Cd300lg | ENSMUST00000017453.11 | chr11(+): 102055611 | 55,5    | 100     | 345         |
| Cd300lg | ENSMUST00000017453.11 | chr11(+): 102054686 | 43,6    | 86,6    | 521         |
| Cdh10   | ENSMUST00000040562.13 | chr15(+): 19014236  |         |         | 447         |
| Cdh11   | ENSMUST00000075190.4  | chr8(-): 102632101  | 50      | 100     | 387         |
| Cdh11   | ENSMUST00000075190.4  | chr8(-): 102633509  | 49,7    | 92,1    | 578         |
| Cdh18   | ENSMUST00000164787.7  | chr15(+): 23474418  |         |         | 379         |
| Cdh3    | ENSMUST00000080797.7  | chr8(+): 106556123  | 75,2    | 100     | 392         |
| Cldn5   | ENSMUST00000043577.2  | chr16(+): 18778257  | 100     | 100     | 583         |
| Clec3b  | ENSMUST00000026890.5  | chr9(+): 123157428  | 100     | 100     | 481         |
| Col12a1 | ENSMUST00000071750.12 | chr9(-): 79598992   | 47,5    | 79,3    | 525         |
| Col14a1 | ENSMUST00000110221.9  | chr15(+): 55520203  |         |         | 486         |
| Col1a1  | ENSMUST00000001547.7  | chr11(+): 94953035  | 86      | 100     | 418         |
| Col1a2  | ENSMUST00000031668.9  | chr6(+): 4540973    | 71,1    | 100     | 583         |
| Crabp1  | ENSMUST00000034830.8  | chr9(+): 54773108   | 100     | 100     | 348         |
| Csf3    | ENSMUST00000038886.2  | chr11(+): 98703629  |         |         | 386         |
| Cxadr   | ENSMUST00000023572.14 | chr16(+): 78340731  | 80,3    | 100     | 478         |
| Cxcl12  | ENSMUST00000112871.7  | chr6(+): 117181364  | 98,5    | 100     | 570         |
| Cxcl14  | ENSMUST00000021970.10 | chr13(-): 56288684  | 54,8    | 100     | 539         |
| Cxcl14  | ENSMUST00000021970.10 | chr13(-): 56289702  | 44,9    | 100     | 431         |
| Cxcl3   | ENSMUST00000031326.9  | chr5(+): 90788093   |         |         | 535         |
| Cxcl5   | ENSMUST00000031318.5  | chr5(+): 90761623   | 99,3    | 100     | 499         |
| Dcn     | ENSMUST00000105287.10 | chr10(+): 97518125  | 93,2    | 100     | 542         |
| Dll4    | ENSMUST00000102517.3  | chr2(+): 119335640  | 97,9    | 100     | 482         |
| Ednrb   | ENSMUST00000022718.10 | chr14(-): 103814620 | 79,5    | 100     | 482         |
| Emcn    | ENSMUST00000119475.5  | chr3(+): 137431061  | 100     | 100     | 478         |
| Ezr     | ENSMUST00000064234.6  | chr17(-): 6738612   | 48,7    | 100     | 394         |
| Ezr     | ENSMUST00000064234.6  | chr17(-): 6738293   | 46,4    | 95,2    | 462         |
| F11r    | ENSMUST00000043839.4  | chr1(+): 171464008  | 94,4    | 100     | 461         |
| Fap     | ENSMUST00000102732.9  | chr2(-): 62500943   |         |         | 389         |
| Flt4    | ENSMUST00000020617.2  | chr11(+): 49652726  | 97      | 100     | 472         |
| Gas6    | ENSMUST00000033828.6  | chr8(-): 13465412   | 99,8    | 100     | 591         |
| Gjb2    | ENSMUST00000055698.7  | chr14(-): 57098717  | 45,7    | 61,9    | 574         |
| Gjb3    | ENSMUST00000046532.3  | chr4(-): 127325237  | 100     | 100     | 362         |
| Gpm6a   | ENSMUST00000033915.8  | chr8(+): 55060840   | 59,1    | 75,8    | 533         |
| Gpr84   | ENSMUST00000079824.5  | chr15(-): 103308235 |         |         | 379         |
| H2-Q10  | ENSMUST00000068291.6  | chr17(+): 35474530  | 99,9    | 100     | 471         |
| Has1    | ENSMUST00000003762.7  | chr17(-): 17843332  | 100     | 100     | 343         |

|          |                       |                     |      |      |     |
|----------|-----------------------|---------------------|------|------|-----|
| Hck      | ENSMUST00000109799.7  | chr2(+): 153151425  | 100  | 100  | 550 |
| Hp       | ENSMUST00000074898.7  | chr8(-): 109575153  | 97,2 | 100  | 551 |
| Igf1     | ENSMUST00000105300.8  | chr10(+): 87930893  | 87,3 | 100  | 490 |
| Igfbp4   | ENSMUST00000017637.12 | chr11(+): 99052619  | 94,5 | 100  | 385 |
| Igfbp7   | ENSMUST00000163898.5  | chr5(-): 77349266   | 99,7 | 100  | 404 |
| Il11     | ENSMUST00000094892.11 | chr7(-): 4772373    |      |      | 569 |
| Il13ra2  | ENSMUST00000033646.8  | chrX(-): 147383533  | 100  | 100  | 504 |
| Irf5     | ENSMUST00000004392.11 | chr6(+): 29537318   | 99   | 100  | 399 |
| Ism1     | ENSMUST00000184404.7  | chr2(+): 139758571  | 78,9 | 100  | 589 |
| Itih2    | ENSMUST00000042290.13 | chr2(-): 10094646   | 100  | 100  | 444 |
| Kcnj15   | ENSMUST00000113854.7  | chr16(+): 95299622  | 81,3 | 97,6 | 388 |
| Klhdc8a  | ENSMUST00000046071.4  | chr1(+): 132305568  | 45,1 | 75   | 515 |
| Lgals7   | ENSMUST00000081457.4  | chr7(+): 28866284   | 100  | 100  | 382 |
| Lif      | ENSMUST00000066283.11 | chr11(+): 4272512   | 100  | 100  | 458 |
| Lipg     | ENSMUST00000066532.4  | chr18(-): 74939368  | 100  | 100  | 488 |
| Lrrn4    | ENSMUST00000049787.2  | chr2(-): 132868311  | 89,7 | 93,7 | 480 |
| Lum      | ENSMUST00000038160.5  | chr10(+): 97572702  | 99,8 | 100  | 546 |
| Ly6a     | ENSMUST00000023248.12 | chr15(-): 74994879  | 91,9 | 100  | 537 |
| Ly6c1    | ENSMUST00000065408.15 | chr15(-): 75045040  | 100  | 100  | 373 |
| Lyve1    | ENSMUST00000033050.4  | chr7(-): 110850648  | 99,5 | 100  | 513 |
| Mmrn1    | ENSMUST00000129603.3  | chr6(+): 60989367   | 100  | 100  | 348 |
| Mogat2   | ENSMUST00000064231.7  | chr7(-): 99219086   | 100  | 100  | 466 |
| Msln     | ENSMUST00000237359.1  | chr17(-): 25748618  | 100  | 100  | 569 |
| Ndufa4   | ENSMUST00000204978.2  | chr6(-): 11900388   | 99,2 | 100  | 352 |
| Nfe2l3   | ENSMUST00000005103.11 | chr6(+): 51458767   | 100  | 100  | 401 |
| Nid2     | ENSMUST00000022340.4  | chr14(+): 19811785  | 88,7 | 100  | 456 |
| Nkain4   | ENSMUST00000103053.9  | chr2(-): 180934802  | 100  | 100  | 569 |
| Nos2     | ENSMUST00000018610.6  | chr11(+): 78960220  | 88,9 | 100  | 431 |
| Pdgfra   | ENSMUST00000000476.14 | chr5(+): 75198199   | 54,6 | 100  | 435 |
| Pdgfrb   | ENSMUST00000025522.10 | chr18(+): 61085038  | 100  | 100  | 554 |
| Pdpr     | ENSMUST00000030317.13 | chr4(-): 143267437  | 100  | 100  | 442 |
| Pecam1   | ENSMUST00000080853.10 | chr11(-): 106654220 | 81,7 | 100  | 566 |
| Pi16     | ENSMUST00000114701.9  | chr17(+): 29328895  | 97,4 | 100  | 568 |
| Piezo2   | ENSMUST00000047480.12 | chr18(-): 63010233  | 71,3 | 100  | 580 |
| Pkp1     | ENSMUST00000027667.12 | chr1(-): 135871402  | 100  | 100  | 378 |
| Pnpla3   | ENSMUST00000045289.5  | chr15(+): 84186206  |      |      | 435 |
| Ptn      | ENSMUST00000101534.4  | chr6(-): 36714934   | 100  | 100  | 370 |
| Ramp3    | ENSMUST00000045374.7  | chr11(+): 6677472   | 100  | 100  | 447 |
| Rrm2     | ENSMUST00000020980.11 | chr12(+): 24714085  | 69,9 | 100  | 431 |
| Saa1     | ENSMUST00000128088.3  | chr7(-): 46740527   | 100  | 100  | 364 |
| Saa3     | ENSMUST00000006956.8  | chr7(-): 46712000   | 100  | 100  | 411 |
| Saa4     | ENSMUST00000006952.8  | chr7(-): 46728017   | 67,1 | 92,4 | 448 |
| Selp     | ENSMUST00000162746.1  | chr1(+): 164150026  |      |      | 433 |
| Shank2   | ENSMUST00000105902.7  | chr7(+): 144424489  | 19,8 | 85,7 | 467 |
| Shank2   | ENSMUST00000105902.7  | chr7(+): 144424036  | 73,4 | 100  | 537 |
| Slpi     | ENSMUST00000109367.9  | chr2(-): 164354074  | 98,1 | 100  | 442 |
| Smim10l2 | ENSMUST00000068106.4  | chrX(+): 56377796   | 100  | 100  | 420 |
| Spink5   | ENSMUST00000069245.7  | chr18(+): 44022148  | 100  | 100  | 378 |
| Steap4   | ENSMUST00000115421.2  | chr5(+): 7982194    | 96,9 | 100  | 562 |
| Tagln    | ENSMUST00000034590.3  | chr9(-): 45930003   | 98,9 | 100  | 353 |

|         |                       |                    |      |      |     |
|---------|-----------------------|--------------------|------|------|-----|
| Thbs2   | ENSMUST00000170872.2  | chr17(-): 14665498 | 42,1 | 100  | 475 |
| Thbs2   | ENSMUST00000170872.2  | chr17(-): 14667118 | 57,9 | 100  | 563 |
| Tll1    | ENSMUST00000066166.5  | chr8(-): 64014931  |      |      | 430 |
| Tmem252 | ENSMUST00000057243.5  | chr19(+): 24678247 | 86,3 | 95,1 | 479 |
| Tnnt2   | ENSMUST00000179863.7  | chr1(+): 135852224 | 98,7 | 100  | 368 |
| Vcam1   | ENSMUST00000029574.12 | chr3(-): 116110141 | 98,7 | 100  | 390 |
| Vim     | ENSMUST00000028062.7  | chr2(+): 13582778  | 99,4 | 100  | 529 |
| Vwf     | ENSMUST00000112254.7  | chr6(+): 125686672 | 99,9 | 100  | 496 |
| Myl9    | ENSMUST00000088552.6  | chr2(+): 156781656 | 100  | 100  | 539 |
| Myod1   | ENSMUST00000072514.2  | chr7(+): 46379096  | 100  | 100  | 451 |
