# Supplementary material for: BAG6 restricts pancreatic cancer progression by suppressing the release of IL33-presenting extracellular vesicles and the activation of mast cells
Source: PubMed Central journal article supplement (PMC11291976; doi:10.1038/s41423-024-01195-1), 2024-06-28
Supplement: 41423_2024_1195_MOESM15_ESM.pdf [file 41423_2024_1195_MOESM15_ESM.pdf]

| <b>Supplementary table S6: Antibodies used for flow cytometry and nano-FCM in this study.</b> |                 |                    |              |
|-----------------------------------------------------------------------------------------------|-----------------|--------------------|--------------|
| <b>Flow cytometry</b>                                                                         | <b>Supplier</b> | <b>Cat. Number</b> | <b>Clone</b> |
| monoclonal hamster anti-Cd81 Antibody                                                         | BioLegend       | 104905             | Eat-2        |
| monoclonal hamster IgG Isotype Ctrl, FITC-conjugated                                          | BioLegend       | 400905             | HTK888       |
| monoclonal rat anti-IL-33R $\alpha$ (IL1RL1, ST2), PE-conjugated                              | BioLegend       | 145303             | DIH9         |
| monoclonal rat IgG2a, $\kappa$ Isotype Ctrl, PE-conjugated                                    | BioLegend       | 400507             | RTK2758      |
| monoclonal rat anti-Mouse IL-33, Alexa Fluor <sup>®</sup> 647-conjugated                      | R&D systems     | IC3626R            | 396118       |
| monoclonal rat IgG2a, $\kappa$ Isotype Ctrl, APC-conjugated                                   | BioLegend       | 400511             | RTK2758      |
| monoclonal rat anti-mouse CD117 (c-Kit), APC-conjugated                                       | BioLegend       | 105811             | 2B8          |
| monoclonal rat IgG2b, $\kappa$ Isotype Ctrl, APC-conjugated                                   | BioLegend       | 400611             | RTK4530      |
| <b>nano-flow cytometry</b>                                                                    |                 |                    |              |
| monoclonal rat anti-Cd63 antibody, PE-conjugated                                              | BioLegend       | 143904             | NVG-2        |
| monoclonal hamster anti-Cd81, FITC-conjugated                                                 | Miltenyi Biotec | 130-102-631        | 16-10A1      |
| monoclonal rat anti-Cd9, FITC-conjugated                                                      | BioLegend       | 124808             | MZ3          |
| monoclonal hamster Isotype control, FITC-conjugated                                           | BioLegend       | 400905             | HTK888       |
| monoclonal rat isotype control, FITC                                                          | BioLegend       | 400506             | RTK2758      |
| monoclonal rat isotype control, PE-conjugated                                                 | BioLegend       | 400508             | RTK2758      |
| monoclonal rat antiCd63, FITC-conjugated                                                      | BioLegend       | 143919             | NVG-2        |
